# Supplementary material
Source: ML conference proceedings conference paper supplement (https://aclanthology.org/2022.acl-long.104)
Supplement: software [file 2022.acl-long.104.software.zip]

## Sheet: train
index	original	translation	scores	mean	z_scores	z_mean	model_scores	fluent_inadequate
18	Renaissance Humanism and the Future of the Humanities.	Renaissance Humanism and the Future of the Humanities.	[1, 1, 1]	1	[-4.503593318384322, -3.4312512323590427, -8.00864789335575]	-5314497481366370	-0.12549848854541779	0
1846	Faerie Apocalypse, Jason Franks, IFWG Publishing Australia.	Faerie Apocalypse, Jason Franks, IFWG Publishing Australia.	[1, 1, 1]	1	[-8.00864789335575, -7.556217303171075, -4.933081736850102]	-6832648977792300	-0.12904708087444305	0
2080	Haroun and S.A. Mourad, Proceedings of International Colloquium on Structural Engineering, Cairo, Egypt, April 1992, pp.	Haroun and S.A. Mourad, Proceedings of International Colloquium on Structure Engineering, Cairo, Egypt, April 1992, pp.	[1, 1, 1]	1	[-9.000885564931252, -8.00864789335575, -4.5739530784473486]	-7194495512244780	-0.24092458188533783	0
2163	Pollock, Griselda, Generations and Geographies in the Visual Arts, Routledge, London, 1996.	Pollock, Griselda, Generations and Geographies in the Visual Arts, Routledge, London, 1996.	[1, 1, 1]	1	[-8.00864789335575, -7.556217303171075, -4.933081736850102]	-6832648977792300	-0.13844096660614014	0
2214	Illustrated Encyclopedia of Woodworking Handtools, Instruments & Devices.	Illustrated Encyclopedia of Woodworking Handtools, Instruments & Devices.	[1, 1, 1]	1	[-8.00864789335575, -7.556217303171075, -4.933081736850102]	-6832648977792300	-0.22093158960342407	0
2576	The Great Reform Act of 1832 and British Democratization.	The Great Reform Act of 1832 and British Democracy.	[1, 1, 1]	1	[-8.00864789335575, -7.556217303171075, -4.933081736850102]	-6832648977792300	-0.29448390007019043	0
6229	Boone Trails Grand Towers Gravois Trail New Horizons North Star Osage Ozark Trailblazers Pathfinder River Trails Thunderbird	Boone Trails Grand Towers Gravois Trail New Horizons North Star Osage Ozark Trailblazers Pathfinder River Trails Thunderbird	[1, 1, 1]	1	[-9.000885564931252, -7.556217303171075, -4.5739530784473486]	-7043685315516550	-0.06131245940923691	0
2604	U.S. Army National Infantry Museum, "Indian Wars", U.S. Army Infantry Home Page Viele, John.	U.S. Army National Infantry Museum, "Indian Wars", U.S. Army Infantry Home Page Viele, John.	[4, 3, 1]	2.66667	[-7.74018790234345, -7.366045157778585, -4.933081736850102]	-6679771598990710	-0.16763374209403992	0
2500	Radio Birdman, in The Trouser Press Record Guide, 4th ed., ed.	Radio Birdman, in The Hose Press Record Guide, 4th ed., ed.	[5, 3, 1]	3	[-5.168824371638764, -7.366045157778585, -8.00864789335575]	-6847839140924360	-0.23988540470600128	0
3917	The Mummy, A Handbook of Egyptian Funerary Archaeology.	The Mummy, A Handbook of Egyptian Funerary Archaeology.	[1, 1, 1, 9, 22, 1]	5.83333	[-9.000885564931252, -8.00864789335575, -7.9114489868019655, -2.5435093700941005, -2.0289219283370814, -2.4708547552253903]	-5327378083124250	-0.21975237131118774	0
4994	Center for Advanced Study in the Behavioral Sciences fellows	Center for Advanced Study in the Behavioral Sciences Fellows	[1, 8, 15]	8	[-8.00864789335575, -6.890614794297358, -4.137233915325214]	-634549886765944	-0.09233444184064865	0
1364	154 Randy Hankins and his Melody Wranglers Love Bird Of Tennessee / Blue Mountain Girl 1950	154 Randy Hankins and his Melody Wranglers Love Bird Of Tennessee / Blue Mountain Girl 1950	[9, 1, 16]	8.66667	[-8.252090652729919, -8.00864789335575, -3.675635088303992]	-6.64546e+16	-0.1505301296710968	0
1279	Grushenka inspires complete admiration and lust in both Fyodor and Dmitri Karamazov.	Grushenka begeistert sowohl bei Fjodor als auch Dmitri Karamazow v√∂llige Bewunderung und Lust.	[11, 1, 20]	10.6667	[-8.064891924679586, -7.556217303171075, -3.572922092648766]	-6398010440166470	-0.3543107211589813	0
423	Their krises are gilt, and also the point of their lances.	Ihre Aufg√§nge sind vergoldet, und auch der Punkt ihrer Lanzen.	[12, 1, 22]	11.6667	[-7.971292560654419, -7.556217303171075, -3.467550409933126]	-6331686757919530	-0.4293419420719147	1
6797	The Wings of Light Whirl to the Stars Worst Maneuvers in History!?	Die Fl√ºgel des Lichts wirbeln zu den Sternen schlechteste Man√∂ver in der Geschichte!?	[12, 20, 3]	11.6667	[-7.971292560654419, -6.3214636391926, -4.400542105395953]	-6231099435080990	-0.32488763332366943	0
1016	In the Second Branch of the Mabinogi, he seizes the throne from Caradog ap Bran during Bran's campaigns in Ireland.	In der zweiten Zweig der Mabinogi, ergreift er den Thron von Caradog ap Bran w√§hrend Bran Kampagnen in Irland.	[12, 1, 23]	12	[-7.971292560654419, -7.556217303171075, -3.4148645685753056]	-6314124810800260	-0.2832818627357483	0
6975	He vacated the WWA Cruiserweight title in April 2002 after returning to WWF.	Nach seiner R√ºckkehr zum WWF verlie√ü er im April 2002 den Titel WWA Cruiserweight.	[1, 13, 24]	12.6667	[-9.000885564931252, -10.29283318973243, -3.332073285785744]	-7541930680149800	-0.3605729043483734	1
979	Later in the month she hosted the Sea Furies of 802 and the Fireflies of 814 Squadrons for Exercise Winged Fleet.	Sp√§ter im Monat war sie Gastgeberin der Sea Furies von 802 und der Gl√ºhw√ºrmchen von 814 Squadrons f√ºr die √úbung Gefl√ºgelte Flotte.	[13, 1, 25]	13	[-7.877693196629252, -7.556217303171075, -3.3094928858596657]	-6247801128553330	-0.3446216285228729	0
4962	Vanderbilt halfback Gil Reese starred in this game, including two punt returns for touchdowns.	Vanderbilt halfback Gil Reese spielte in diesem Spiel, darunter zwei punt Renditen f√ºr Touchdowns.	[14, 1, 26]	13.6667	[-7.784093832604086, -7.556217303171075, -3.1180143059255605]	-6152775147233570	-0.32762134075164795	0
3172	Wild boar may on occasion contract swine erysipelas through rodents or hog lice and ticks.	Wildschwein kann gelegentlich Schweine Erysipel durch Nagetiere oder Schweine L√§use und Zecken Vertrag.	[21, 7, 14]	14	[-7.128898284427919, -7.409348350714797, -4.838612074688062]	-6458952903276920	-0.4118495583534241	0
5464	Katniss and several other tributes are stung and hallucinate.	Katniss und andere Ehrungen werden gestochen und halluziniert.	[14, 1, 27]	14	[-7.784093832604086, -7.556217303171075, -3.0622522276877175]	-6134187787820950	-0.3307887315750122	0
5914	At first, these farmed Crown land, but later estates contracted sharecropping "Visiting Tenants".	Auf den ersten, diese bewirtschafteten Kronland, aber sp√§ter G√ºter Vertrag sharecropping "Visiting Mieter".	[14, 22, 6]	14	[-7.784093832604086, -6.154096760496877, -4.310523871658248]	-6082904821586400	-0.41813573241233826	0
4085	Dopamine is also synthesized there, by tubule cells, and discharged into the tubular fluid.	Dort wird auch Dopamin durch Schlauchzellen synthetisiert und in die Rohrfl√ºssigkeit abgeleitet.	[15, 1, 28]	14.6667	[-7.690494468578919, -7.556217303171075, -3.151435361786205]	-6132715711178730	-0.43580448627471924	1
130	Real Time Relativity The Australian National University.	Real Time Relativity Die Australian National University.	[15, 1, 29]	15	[-7.690494468578919, -7.556217303171075, -3.098749520428385]	-6.11515e+16	-0.22321386635303497	0
4399	Wheeler‚Äôs Dental Anatomy, Physiology, and Occlusion.	Wheeler sucht Zahnanatomie, Physiologie und Okklusion.	[14, 15, 16]	15	[-7.784093832604086, -6.755834601965016, -3.675635088303992]	-6071854507624360	-0.3137657940387726	0
6599	The Mughals now bordered Persian ruled Kandahar on three sides.	Die Moguln nun grenzt persischen regiert Kandahar auf drei Seiten.	[16, 1, 30]	15.6667	[-7.596895104553752, -7.556217303171075, -3.046063679070565]	-6066392028931790	-0.421989381313324	0
6955	In his last three seasons, McCabe took only one wicket, from 18 overs of bowling.	In seinen letzten drei Jahreszeiten, McCabe nahm nur einen Wicker, von 18 overs Bowling.	[16, 1, 30]	15.6667	[-7.596895104553752, -7.556217303171075, -2.8949659929741878]	-6.01603e+16	-0.4317725598812103	0
4056	Morton positioned the boat to intercept the seaplane tender .	Morton positioniert das Boot, um das Wasserflugzeug Ausschreibung abfangen.	[16, 1, 31]	16	[-7.596895104553752, -7.556217303171075, -2.839203914736345]	-5997438774153720	-0.2834887206554413	0
4737	The sniping at traffic continued during the Second Truce.	Die Scharfsch√ºtzen am Verkehr w√§hrend des zweiten Waffenstillstands fortgesetzt.	[17, 22, 11]	16.6667	[-7.503295740528586, -6.154096760496877, -3.9544454794932076]	-5870612660172890	-0.5970406532287598	0
3643	Apostasy Brights movement Death of God theology Dysteleology Lists of atheists Outline of atheism	Apostasie Brights Bewegung Tod Gottes Theologie Dysteleologie Listen von Atheisten Darstellung des Atheismus	[19, 33, 4]	18.6667	[-6.397887947281949, -1.9099308228136218, -4.762542917951912]	-4356787229349160	-0.34689024090766907	0
1719	At 0000 UTC on June 21, the JMA upgraded the cyclone to Tropical Storm Bebinca.	Mit 0000 UTC am 21. Juni verbesserte die JMA den Wirbelsturm auf Tropical Storm Bebinca.	[19, 23, 21]	21	[-6.397887947281949, -5.464323703853678, -4.750584666655395]	-5537598772597000	-0.29335540533065796	1	?
1799	Sussex edged past Somerset with 2 balls and 2 wickets remaining.	Sussex eingefasst vorbei Somerset mit 2 Kugeln und 2 Pforten √ºbrig.	[22, 27, 16]	21.6667	[-7.035298920402752, -5.735679563757571, -3.675635088303992]	-5482204524154770	-0.4454176723957062	0
616	Canadian expatriate musicians in the United States	Kanadische Wahlausl√§nder in den Vereinigten Staaten	[23, 23, 22]	22.6667	[-6.941699556377586, -6.039941292598882, -3.34563953546758]	-5442426794814680	-0.28522565960884094	1
3272	Catcher Kristina Hilberth then picked off the runner at third for the second out.	Die F√§ngerin Kristina Hilberth holte dann den dritten Platz f√ºr den zweiten Platz ab.	[30, 18, 24]	24	[-5.413534646903515, -3.8629870534293285, -5.369237631157432]	-4881919777163420	-0.5213789939880371	1
2077	The common Jacobite supporters fared better than the ranking individuals.	Den gemeinsamen Jakobiten ging es besser als den Ranking-Individuen.	[25, 34, 15]	24.6667	[-5.274151558461186, -2.6719176800228155, -3.7316241297731607]	-3892564456085720	-0.6356940865516663	1
6167	Rock Hacker, Stone Chopper, Cave Cutter, Underground Mining Station, Rubble Rescue Rover	Steinhacker, Steinhacker, H√∂hlenschneider, U-Bahnhof, Schutt Rover	[34, 15, 25]	24.6667	[-5.055587992220448, -4.046284185264647, -5.274151558461186]	-4792007911982090	-0.3791505694389343	0
6936	Incumbent Democrat Joe Lieberman lost the August 8 Democratic primary to cable executive Ned Lamont, a former Greenwich selectman.	Der amtierende Demokrat Joe Lieberman verlor den 8. August Democratic Prim√§r Kabel Executive Ned Lamont, ein ehemaliger Greenwich Selectman.	[17, 25, 32]	24.6667	[-7.503295740528586, -5.274151558461186, -2.7834418364985014]	-5186963045162750	-0.32145097851753235	0
6605	Nancy passed through the Korea Straits just before turning extratropical and accelerating northeastward into the Sea of Japan.	Nancy durchquerte die Koreastra√üe kurz bevor sie extratrope und beschleunigte Nordost in das japanische Meer verwandelte.	[27, 25, 29]	27	[-6.567302100276919, -5.903046442453293, -2.950728071212031]	-5140358871314080	-0.4226386845111847	0
3034	Fredrick the slime mold supposedly gained sentience from living in the squalor of Fooker's cesspool of an apartment.	Fredrick die Schleimform angeblich gewonnen Sentience aus dem Leben in der squalor von Fooker 's cesspool einer Wohnung.	[40, 28, 15]	27.6667	[-5.350510367949751, -7.9160002157321525, -3.868455814717107]	-5711655466133000	-0.42244356870651245	0
6027	Democratic presidential primaries of 1972 and assassination attempt	Demokratische Pr√§sidentschaftswahlen 1972 und Attentat	[33, 22, 28]	27.6667	[-5.145074655891214, -3.6185908776489044, -4.988893340372451]	-4.58419e+16	-0.5070192217826843	1
5130	The VC continued their assault regardless, surging around the flanks of 11 Platoon.	Die VC setzte ihren Angriff unabh√§ngig, wog um die Flanken von 11 Zug.	[31, 28, 25]	28	[-6.192904644176252, -5.65199612440971, -3.1737763841634035]	-5.00623e+16	-0.44623270630836487	0
6148	He batted at 5 and was dismissed for 4 and 15 caught behind by Fidel Edwards in both innings.	Er schlug mit 5 und wurde f√ºr 4 und 15 hinter Fidel Edwards in beiden Innings gefangen entlassen.	[35, 21, 28]	28	[-4.966101328549681, -3.6796899215940106, -4.988893340372451]	-4544894863505380	-0.42434385418891907	0
3075	While the northern weighs from 90 to, other pocket gophers hunted average from 95 to in mass.	W√§hrend der Norden von 90 bis wiegt, jagten andere Taschengopher durchschnittlich von 95 bis in Masse.	[29, 40, 18]	29	[-4.893807267676205, -2.3373452105957564, -3.5662021607850547]	-3599118213019000	-0.36086979508399963	0
3325	Metacomet, unleashed from Hartford, captured Selma.	Metacomet, entfesselt von Hartford, gefangen Selma.	[29, 35, 23]	29	[-4.893807267676205, -2.616155601784972, -3.2904988791382115]	-3600153916199790	-0.2777256965637207	0
2741	In the Guangzhou Open C√Ærstea advanced to the semifinals before losing to Laura Robson.	Im Guangzhou Open stieg C√Ærstea ins Halbfinale vor Laura Robson.	[35, 30, 25]	30	[-2.616155601784972, -4.79872119497996, -5.860967965257348]	-442528158734076	-0.3447721302509308	0
2874	Three Tampa Bay quarterbacks completed a combined 3 of 8 passes for ‚àí4 yards.	Drei Tampa Bay Quartiere absolvierten zusammen 3 von 8 P√§ssen f√ºr ‚àí 4 Yards.	[30, 40, 20]	30	[-4.79872119497996, -2.3373452105957564, -3.4559208481263175]	-3.53066e+16	-0.35953056812286377	0
6130	The Benevolent Asylum fronted present Railway Square.	Die Wohlwollende Asyl fronted gegenw√§rtigen Railway Square.	[32, 30, 28]	30	[-6.099305280151086, -7.599089152532115, -5.65199612440971]	-6450130185697630	-0.573100745677948	0
705	Buzz began pacing the sidelines of Grant Field as a mischievous anthropomorphized yellow jacket during the 1970s.	Buzz begann in den 1970er Jahren als schelmische anthropomorphierte gelbe Jacke den Rand von Grant Field zu sprengen.	[32, 43, 21]	32	[-4.608549049587469, -2.170058975882227, -3.4007801917969487]	-3.39313e+16	-0.44531863927841187	1	what is this sentence (German and english?!)
2891	Devastated, Andy confronts Angela who tries to squirm her way out of the confrontation before admitting to the affair.	Verw√ºstert konfrontiert Andy Angela, die versucht, sich aus der Konfrontation herauszuquirlen, bevor sie der Aff√§re zugibt.	[33, 40, 25]	32.6667	[-4.513462976891224, -2.3373452105957564, -3.180217566479474]	-3.34368e+16	-0.4624886214733124	0
2475	For this very reason, Maria kills her, impaling her.	Genau aus diesem Grund t√∂tet Maria sie und ruft sie an.	[34, 44, 23]	33.6667	[-4.418376904194979, -2.1142968976443837, -3.2904988791382115]	-3.27439e+16	-0.5235472321510315	1
3381	Lindwall's Test haul of 27 scalps equalled the record for an Australian fast bowler in England.	Lindwalls Teststrecke von 27 Kopfhaut entsprach dem Rekord f√ºr einen australischen Fast Bowler in England.	[34, 44, 23]	33.6667	[-4.418376904194979, -2.1142968976443837, -3.2904988791382115]	-3.27439e+16	-0.3972945809364319	0
1699	Theys bumped Smith, and added to the lore of the Curse of the Smiths at the Indy 500.	Theys stie√ü Smith, und f√ºgte hinzu, die lore of the Curse of the Smiths at the Indy 500.	[33, 37, 40]	36.6667	[-5.145074655891214, -4.133118686106243, -2.716077091173629]	-3.99809e+16	-0.3224237263202667	0
6590	The church and chapel fielded useful sides, also very often second elevens.	Die Kirche und Kapelle nutzten Seiten, auch sehr oft zweite erhebt.	[37, 48, 25]	36.6667	[-5.631308460025252, -3.9783273374524826, -4.021249420698299]	-4543628406058670	-0.6261408925056458	0
122	For coronation he summoned "Dadiani, Gurieli, Sharvashidze and Gelovani", but headed with Vameq II Dadiani.	Zur Kr√∂nung rief er "Dadiani, Gurieli, Sharvashidze und Gelovani", leitete aber Vameq II Dadiani.	[31, 37, 43]	37	[-6.192904644176252, -4.133118686106243, -2.170058975882227]	-4165360768721570	-0.19605714082717896	1	grammar or meaning??
2051	Mattock and Mark Refoy, both peeved, left the meeting prematurely and effectively resigned from Spacemen 3.	Mattock und Mark Refoy, beide erbost, verlie√ü das Treffen vorzeitig und effektiv zur√ºckgetreten von Spacemen 3.	[38, 29, 47]	38	[-5.537709096000086, -5.568312685061848, -2.3865241127187735]	-4497515297926900	-0.3404783606529236	0
2269	Another common method of preparing taro is to boil, peel then slice it into thick slices, before frying and marinating in edible "red" sumac.	Eine weitere g√§ngige Methode der Vorbereitung Taro ist zu kochen, sch√§len dann in dicke Scheiben schneiden, vor dem Braten und marinieren in essbaren "rot" sumac.	[39, 52, 25]	38.6667	[-5.444109731974919, -3.6435935800610375, -3.3094928858596657]	-4132398732631870	-0.3710942268371582	0
516	When Carla tries to warn Maria, Tony knocks her unconscious and pulls Maria into the hostage situation.	Als Carla Maria zu warnen versucht, klopft Tony ihr bewusstlos an und zieht Maria in die Geiselsituation.	[45, 41, 37]	41	[-4.882513547823918, -3.7527743953212616, -2.5046314453092857]	-3713306462818150	-0.3224654197692871	0
6248	His innings was soon terminated at 138 when he leg glanced an inswinger from Bedser to Hutton at short fine leg.	Sein Innings wurde bald mit 138 beendet, als er Bein blickte ein Inwinger von Bedser Hutton auf kurze feine Bein.	[42, 34, 49]	41.6667	[-5.697622773331892, -5.149895488322541, -2.237912721084271]	-4361810327579560	-0.5310853123664856	0
37	This marked the first international bandy in Harbin.	Dies war der erste internationale Verband in Harbin.	[57, 27, 42]	42	[-1.4157165639396765, -2.122423442696315, -4.339694682854314]	-2.62594e+16	-0.32772648334503174	1
2748	Retrieved December 27, 2014.</ref><ref>[[Lo√Øc Wacquant]].	27. Dezember 2014. < / ref > < ref > [[Lo√Øc Wacquant]]	[50, 34, 42]	42	[-2.2389799062591984, -4.418376904194979, -4.339694682854314]	-366568383110283	-0.372321218252182	0
5815	Unlike the related ratites, tinamous can fly, though poorly and reluctantly, preferring to walk or run.	Im Gegensatz zu den verwandten Verh√§ltnissen, k√∂nnen tinam√∂se fliegen, wenn auch schlecht und widerwillig, lieber zu Fu√ü oder laufen.	[42, 52, 32]	42	[-5.163311639899418, -3.6435935800610375, -2.7834418364985014]	-3863449018819650	-0.5023176074028015	0
1056	After 16 splashed down, I kicked them off the backup crew for 17."	Nachdem 16 gespritzt waren, habe ich sie f√ºr 17 Jahre aus dem Backup-Team gesto√üen ".	[32, 53, 43]	42.6667	[-6.099305280151086, -3.3553413824758795, -2.3611477414189035]	-3.9386e+16	-0.6588006615638733	0	? grammar or meaning?
3199	Wood defied tradition and ran for a second term as mayor in 1856, which irked some of his Tammany associates.	Holz trotzte der Tradition und lief 1856 f√ºr eine zweite Amtszeit als B√ºrgermeister, was einige seiner Tammany Mitarbeiter irrte.	[52, 43, 34]	43	[-4.2273179996477515, -3.5626022499287706, -2.6719176800228155]	-3487279309866440	-0.36228543519973755	0	? grammatically NOT correct, right?
3766	In , Shapiro signed veteran help for the bullpen and outfield in the offseason.	In, unterzeichnete Shapiro Veteran Hilfe f√ºr die Stift und Au√üenfeld in der Nebensaison.	[44, 58, 29]	43.6667	[-4.976112911849085, -3.1414929439738692, -2.950728071212031]	-3.68944e+16	-0.2906051576137543	0
1481	When Yale's fake punt failed Collier Winter soon passed to Chris Lorditch for the winning touchdown.	Als Yales gef√§lschter Fotze Collier Winter scheiterte, ging er bald an Chris Lorditch f√ºr den siegreichen Touchdown.	[35, 53, 44]	44	[-5.818507188075586, -3.559910140713176, -2.3084619000610833]	-3895626409616610	-0.39651352167129517	0
5962	Just before the Live Eviction, Arisa informed the HouseGuests of the Double Eviction.	Kurz vor der Live Eviction informierte Arisa die Hausg√§ste √ºber die Double Eviction.	[44, 34, 54]	44	[-3.4675161772325254, -2.6719176800228155, -1.5811385329277825]	-2.57352e+16	-0.2837943136692047	0
1377	Cass attacked Amore, resulting in Big Show retaliating.	Cass angegriffen Amore, was zu Big Show Vergeltung.	[31, 58, 45]	44.6667	[-6.192904644176252, -2.907908064122046, -2.255776058703263]	-3.78553e+16	-0.31125742197036743	0
4514	Each front is 3 bays wide, divided by composite pilasters, with moulded entablature; stuccoed plinth.	Jede Front ist 3 Buchten breit, geteilt durch Verbundpilaster, mit geformter Entablatur; Stucksockel.	[45, 38, 51]	44.6667	[-4.882513547823918, -4.815161730931096, -1.7239623499794816]	-3.80721e+16	-0.44941893219947815	0
6940	A powerful warrior and armoursmith, Iorek repairs the Subtle Knife when it shatters.	Als m√§chtiger Krieger und Panzerschmied repariert Iorek das Subtile Messer, wenn es zerschmettert.	[45, 56, 33]	44.6667	[-3.37243010453628, -3.0868813914635793, -3.114001001936073]	-3191104165978640	-0.31193581223487854	0
6686	The short ends with an impressed Daisy showering her new boyfriend with kisses.	Die kurze Enden mit einem beeindruckt Daisy Duschen ihren neuen Freund mit K√ºssen.	[45, 38, 52]	45	[-4.882513547823918, -4.815161730931096, -2.0149956336325174]	-3.90422e+16	-0.4055849611759186	0
6193	Ida M. Tarbell The Woman Who Challenged Big Business and Won.	Ida M. Tarbell The Woman Who Challenged Big Business and Won.	[100, 90, 75, 1, 7, 1]	45.6667	[0.2654514735602496, -0.0443348266575098, -0.5198479236489196, -2.865718466511266, -2.6527470424939543, -2.4708547552253903]	-1.38134e+16	-0.24474011361598969	0
6593	The Toa rushed to fit the keystones they retrieved into the Codrex.	Die Toa eilte, um die Schl√ºsselanh√§nger, die sie in die Codrex abgerufen passen.	[34, 58, 46]	46	[-5.912106552100752, -2.907908064122046, -2.203090217345443]	-3.67437e+16	-0.4400840699672699	0
3593	The Second Crusade and Aftermath at the Internet Medieval Sourcebook	The Second Crusade and Aftermath at the Internet Medieval Sourcebook	[100, 92, 83, 1, 1, 1]	46.3333	[0.2654514735602496, 0.1346385006840237, 0.2408406579210431, -2.865718466511266, -2.902277088156704, -2.4708547552253903]	-1.26632e+16	-0.16161604225635529	0
5397	Naval artillery disappeared apart from that belonging to marines.	Die Marineartillerie verschwand au√üer der der Marines.	[55, 40, 44]	46.3333	[-3.176368055134346, -1.5705281048522608, -2.4886919993093755]	-2.41186e+16	-0.6498550772666931	0
4739	No Fat Chicks, Cat Sparks, in In Your Face, FableCroft Publishing.	No Fat Chicks, Cat Sparks, In Your Face, FableCroft Publishing.	[87, 100, 89, 1, 1, 1]	46.5	[0.6211849487060245, 0.2654514735602496, -0.13382149032827656, -2.865718466511266, -2.902277088156704, -2.4708547552253903]	-1.24767e+16	-0.24198953807353973	0
2486	While reminiscing, she interchanges places with her young self.	W√§hrend sie erinnert, tauscht sie Orte mit ihrem jungen Selbst aus.	[47, 53, 40]	46.6667	[-4.695314819773585, -3.559910140713176, -2.3373452105957564]	-3.53086e+16	-0.41975468397140503	1
3583	Falling for his trick, Haja snatches the Strike Shot from Terry and he shoots.	Falling f√ºr seinen Trick, schnappt Haja den Strike Shot von Terry und er schie√üt.	[47, 54, 39]	46.6667	[-4.695314819773585, -3.4762267013653148, -2.980969679256783]	-3717503733465220	-0.3541446924209595	0
4135	Morrow to infiltrate the Justice Society only for Red Tornado to defect to them.	Morrow, um die Justice Society nur f√ºr Red Tornado infiltrieren, um sie zu defekt.	[36, 57, 47]	46.6667	[-5.724907824050419, -2.9973947277928126, -2.150404375987623]	-3624235642610280	-0.3689327836036682	0
5897	The two men grappled with one another, the much stronger Native American overpowering Mullan and nearly drowning him.	Die beiden M√§nner ergriff miteinander, die viel st√§rker Native American overpowering Mullan und fast ertrinken ihn.	[47, 56, 37]	46.6667	[-3.182257959143789, -3.0868813914635793, -2.5046314453092857]	-2.92459e+16	-0.4425073266029358	0
506	Eight United Spanish War Veterans served as honorary pall bearers for the dead.	Acht United Spanish War Veterans dienten als Ehrenb√ºrger f√ºr die Toten.	[47, 57, 37]	47	[-3.182257959143789, -2.9973947277928126, -2.886615910071819]	-3.02209e+16	-0.5172866582870483	1
2094	Anoiapithecus Chororapithecus Pierolapithecus Samburupithecus Monkey Day	Anoiapithecus Chororapithecus Pierolapithecus Samburupithecus Monkey Day	[100, 93, 86, 1, 1, 1]	47	[0.2654514735602496, -0.21257256679872272, 0.5260988760097791, -2.865718466511266, -2.902277088156704, -2.4708547552253903]	-1276645421187000	-0.0442039929330349	0
3951	West XIII metope recalls the back of a volute krater, attributed to the Painter of the Woolly Satyrs and preserved in New York.	West XIII Metope erinnert an die R√ºckseite einer Volute Krater, die dem Maler der Woolly Satyrs zugeschrieben und in New York erhalten.	[34, 60, 47]	47	[-5.912106552100752, -2.7289347367805123, -2.150404375987623]	-3.59715e+16	-0.31441447138786316	0
4639	Grouard and Big Bat Pourier crept close enough to the banks of the ravine to parley with the concealed Indians in endeavors to get them to surrender.	Grouard und Big Bat Pourier krochen nahe genug an den Ufern der Schlucht, um sich mit den verborgenen Indianern zu parley, um sie zur Kapitulation zu bewegen.	[47, 61, 33]	47	[-4.695314819773585, -2.6394480731097456, -2.888006154997105]	-3.40759e+16	-0.36166882514953613	0
2804	Hassett then caught Bedser during England's second innings.	Hassett dann gefangen Bedser w√§hrend Englands zweite Innings.	[48, 60, 35]	47.6667	[-4.601715455748418, -2.7289347367805123, -2.616155601784972]	-3.3156e+16	-0.4261113405227661	0
4504	Meade's 1st Brigade of Pennsylvanians, under Brig.	Meade 's 1st Brigade of Pennsylvanians, under Brig.	[81, 100, 88, 15, 1, 1]	47.6667	[0.05066851252855241, 0.2654514735602496, -0.2233081539990433, -2.301852547781227, -2.902277088156704, -2.4708547552253903]	-1.2637e+16	-0.19919651746749878	0
5351	Microbats and toothed whales including oceanic dolphins vocalize both socially and in echolocation.	Mikroflederm√§use und Zahnwale einschlie√ülich ozeanischer Delfine stimmen sozial und in Echoortung.	[48, 47, 48]	47.6667	[-3.8027747008297133, -1.2311253868908998, -2.261306907445122]	-2431735665055240	-0.312071830034256	0
5902	On the July 6 episode of Nitro, Hall was handpicked by Hogan to wrestle United States Heavyweight Champion Bill Goldberg.	Am 6. Juli Folge von Nitro, Hall wurde von Hogan handverlesen, um United States Heavyweight Champion Bill Goldberg ringen.	[48, 37, 59]	48	[-3.087171886447544, -2.5046314453092857, -1.305435251280939]	-2299079527679250	-0.24038320779800415	0
2	In his diary, Chase wrote that the release of Mason and Slidell "‚Ä¶was like gall and wormwood to me.	In seinem Tagebuch, Chase schrieb, dass die Ver√∂ffentlichung von Mason und Slidell "war wie Galle und Wermut f√ºr mich.	[52, 45, 49]	48.6667	[-1.6914198455865197, -1.2163118960067345, -3.7132880371589465]	-2.20701e+16	-0.3517189621925354	0
720	In 170 Costoboci invaded Dobruja, attacking Libida, Ulmetum and Tropaeum.	In 170 Costoboci √ºberfallen Dobruja, Angriff auf Libida, Ulmetum und Tropaeum.	[44, 49, 53]	48.6667	[-4.976112911849085, -3.894643898104621, -1.9406899378152664]	-3.60382e+16	-0.2547106444835663	0
5229	1 in singles or doubles, achieving both feats in August.	1 in Einzel oder Doppel, beide Leistungen im August zu erreichen.	[49, 41, 56]	48.6667	[-2.9920858137512987, -2.2815831323579134, -1.470857220269045]	-2.24818e+16	-0.5442280173301697	0
168	The typhoon then curved north as it rounded a subtropical ridge, although unlike most recurving tropical cyclones, a TUTT cell prevented.	Der Taifun kurvte dann nach Norden, als er einen subtropischen Grat umrundete, obwohl im Gegensatz zu den meisten tropischen Zyklonen eine TUTT-Zelle verhinderte.	[49, 46, 52]	49	[-2.9920858137512987, -2.0027727411686973, -1.6914198455865197]	-2228759466835500	-0.37111547589302063	0
644	Captain Jones dispatched his executive officer, Lt. Silverthorn and Lt. Corey with two platoons to investigate.	Captain Jones entsandte seinen Offizier, Lt. Silverthorn und Lt. Corey, mit zwei Blutpl√§ttchen, um zu untersuchen.	[49, 62, 36]	49	[-2.9920858137512987, -2.549961409438979, -2.943462183037883]	-2828503135409380	-0.4292038679122925	0
3270	It premiered in Australia on Nine Network on September 25, 2011.	Es Premiere in Australien auf Nine Network am 25. September 2011.	[60, 49, 38]	49	[-3.478523087446418, -2.9920858137512987, -2.4488693670714428]	-2.97316e+16	-0.21459832787513733	0
5761	, it shunts empty coaching stock for the Caledonian sleepers into London Euston alongside 87002.	schaltet er neben 87002 leere Coaching-Lager f√ºr die Caledonian Sleepers in London Euston ein.	[43, 56, 50]	49.6667	[-5.069712275874251, -3.0868813914635793, -1.9923468519141625]	-3.38298e+16	-0.5013946890830994	0
2308	Fonda and Hayden divorced on June 10, 1990 in Santa Monica.	Fonda und Hayden scheideten am 10. Juni 1990 in Santa Monica.	[70, 64, 76, 38, 33, 20]	50.1667	[-2.542529447194751, -2.6393923078867014, -0.4247618509526743, -1.3755013955818776, -1.5714501779553744, -1.7857864547326259]	-1.72324e+16	-0.23384054005146027	0
4505	Some substitutes ‚Äúbounty jumped‚Äù, deserting only to collect another substitute bonus.	Einige Ersatz-Floskel gesprungen, verlassene nur, um einen anderen Ersatz Bonus zu sammeln.	[85, 100, 92, 10, 1, 15]	50.5	[0.4310128033135338, 0.2654514735602496, 0.1346385006840237, -2.503233233041955, -2.902277088156704, -1.966067586441248]	-1.09008e+16	-0.9051245450973511	0
6194	He timed out at the top of the Soritatsu Kabe in Sasuke 32, after dislocating his shoulder.	In Sasuke 32 kam er an der Spitze des Soritatsu Kabe heraus, nachdem er seine Schulter aufgel√∂st hatte.	[100, 95, 77, 8, 3, 20]	50.5	[0.2654514735602496, 0.40309849169632395, -0.32967577825642896, -2.583785507146246, -2.8191004062691207, -1.7857864547326259]	-1141633030191300	-0.5926445722579956	1
4418	Woods also pointed out the seeming coincidences that involved locales.	Woods wies auch auf die scheinbaren Zuf√§lle, die Locales beteiligt.	[51, 47, 54]	50.6667	[-2.8019136683588077, -1.9470106629308543, -1.5811385329277825]	-2110020954739140	-0.4682178795337677	0
1257	These splattered and shot panels and canvasses were first exhibited in the Tony Shafrazi Gallery in New York City in 1987.	Diese Splatter- und Shot-Panels und Leinw√§nde wurden 1987 erstmals in der Tony Shafrazi Gallery in New York City ausgestellt.	[52, 43, 60]	51.6667	[-2.7068275956625625, -2.170058975882227, -1.2502945949515705]	-2.04239e+16	-0.38330402970314026	1
1569	Irish Cessation and the Solemn League and Covenant	Irish Cessation und die Feierliche Liga und Bund	[52, 43, 60]	51.6667	[-2.7068275956625625, -2.170058975882227, -1.2502945949515705]	-2.04239e+16	-0.3344183564186096	0
1554	Heirs occur in both testate and intestate succession; legatees occur only in testate succession.	Erben treten sowohl in der Test- als auch in der immateriellen Nachfolge auf; Legate treten nur in der Testnachfolge auf.	[68, 59, 77, 25, 52, 30]	51.8333	[-2.7297281752450844, -2.818421400451279, -0.32967577825642896, -1.8990911772597705, -0.7812717000233351, -1.4252241913153814]	-1.6639e+16	-0.4296889007091522	1
29	Pujols provided levity when he then joined in the booing.	Pujols sorgte f√ºr Leichtigkeit, als er dann in die Booing beitrat.	[53, 51, 52]	52	[-1.636279189257151, -0.9142747137768742, -3.4448280461466463]	-1.99846e+16	-0.5969313383102417	0
5455	Simultaneously, a German battalion, which had just arrived to reinforce the defenders, counterattacked causing several casualties.	Gleichzeitig konterte ein deutsches Bataillon, das gerade gekommen war, um die Verteidiger zu st√§rken, mehrere Opfer zu fordern.	[52, 48, 56]	52	[-2.7068275956625625, -1.8912485846930112, -1.470857220269045]	-2.02298e+16	-0.44381505250930786	0
5694	Waller dismisses the group, though they soon reconvened to rescue Captain Boomerang after Godfrey captures him.	Waller lehnt die Gruppe ab, obwohl sie sich bald wieder versammelten, um Captain Boomerang zu retten, nachdem Godfrey ihn gefangen genommen hatte.	[52, 51, 53]	52	[-4.2273179996477515, -4.271522988931725, -1.6037295814513497]	-3367523523343600	-0.3098624348640442	1
1368	So claimants petitioned the King to sidestep the common law courts.	So Kl√§ger bat den K√∂nig, die Common Law Gerichte zu umgehen.	[53, 38, 67]	52.6667	[-4.133718635622585, -2.4488693670714428, -1.7362344833314276]	-2772940828675150	-0.5086430311203003	0
2115	Afterschool, Joe ignores Sarah's pleas for the doll.	Nachschule ignoriert Joe Sarahs Pl√§doyer f√ºr die Puppe.	[53, 47, 58]	52.6667	[-2.6117415229663172, -1.9470106629308543, -1.3605759076103077]	-1973109364502490	-0.2861126661300659	0
6142	Bobby Lashley pretended to help Young, but he speared him.	Bobby Lashley gab vor, Young zu helfen, aber er beschleunigte ihn.	[58, 47, 53]	52.6667	[-2.907908064122046, -2.091114779021254, -2.6117415229663172]	-2.53692e+16	-0.3156130313873291	0
4030	A sacrifice bunt moved him to second, but Duensing struck out Kyle Farmer for the second out.	Ein Opfer bunt zog ihn an zweiter Stelle, aber Duensing schlug Kyle Farmer f√ºr die zweite heraus.	[45, 53, 61]	53	[-4.882513547823918, -3.9546119257316876, -2.6394480731097456]	-3825524515555110	-0.3923797011375427	0
1718	Richard died during the siege in 1078, after the deathbed lifting of his excommunication.	Richard starb w√§hrend der Belagerung 1078, nach der Aufhebung des Todesbettes seiner Exkommunikation.	[54, 47, 60]	53.6667	[-2.516655450270072, -1.9470106629308543, -1.2502945949515705]	-1.90465e+16	-0.43120941519737244	1
2473	Few commanders understood how the rifle musket strengthened the tactical defensive.	Wenige Kommandeure verstanden, wie die Gewehre die taktische Defensive st√§rkten.	[54, 66, 41]	53.6667	[-4.040119271597418, -1.894690014931446, -2.318906286693168]	-2.75124e+16	-0.4043246805667877	1
4986	The first of these shorts, Trickle Dickle Down, contains reused animation from Coonskin and criticizes Republican presidential candidate Mitt Romney.	Die erste dieser Shorts, Trickle Dickle Down, enth√§lt wiederverwendete Animation von Coonskin und kritisiert republikanischen Pr√§sidentschaftskandidaten Mitt Romney.	[54, 59, 48]	53.6667	[-3.265854718805113, -0.6492921560999952, -2.261306907445122]	-2.05882e+16	-0.16803909838199615	0
5851	A Stengel dive combines an overbanked turn with a camelback hill.	Ein Stengel Tauchgang kombiniert eine √ºberspannte Kurve mit einem Kamelr√ºckenh√ºgel.	[63, 54, 45]	54	[-1.6608807960038638, -3.265854718805113, -3.3193235561118515]	-2.74869e+16	-0.4556354284286499	1
3407	On June 24, Clemens pitched an inning in relief against the San Francisco Giants.	Am 24. Juni schlug Clemens eine Inning in Relief gegen die San Francisco Giants auf.	[68, 74, 61, 51, 46, 25]	54.1667	[-2.7297281752450844, -0.614933996345165, -2.6394480731097456, -0.8519116139039844, -1.0308017456860843, -1.6055053230240035]	-1.57872e+16	-0.3901072144508362	0
15	The use of furrow widener or a longer mouldboard on the rear body will overcome the problem.	Die Verwendung von Furchenwischer oder ein l√§ngeres Mouldboard auf der R√ºckseite K√∂rper wird das Problem zu √ºberwinden.	[57, 52, 55]	54.6667	[-1.4157165639396765, -0.8639351834052308, -3.176368055134346]	-1.81867e+16	-0.5566882491111755	0
441	In his single semester there, he averaged 17.6 points and 13.3 rebounds, before flunking out due to poor academic performance.	In seinem Semester dort lag er im Durchschnitt bei 17,6 Punkten und 13,3 Rebounds, bevor er aufgrund schlechter akademischer Leistungen ausflog.	[55, 47, 62]	54.6667	[-2.4215693775738267, -1.9470106629308543, -1.140013282292833]	-1.8362e+16	-0.47916537523269653	1
6376	768 were commissioned as Navy Ensigns and 259 as Marine 2nd Lieutenants.	768 wurden als Marine Ensign und 259 als Marine 2nd Lieutenants in Dienst gestellt.	[55, 64, 45]	54.6667	[-2.4215693775738267, -2.3709880820974454, -2.0585348194065407]	-2283697426359270	-0.31047993898391724	0
470	In 1843 she sailed from London to Africa under Captain Foster and from London to Cape of Good Hope in 1850 under Captain J Laws.	1843 segelte sie unter Captain Foster von London nach Afrika und 1850 unter Captain J Laws von London nach Cape of Good Hope.	[55, 69, 41]	55	[-3.9465199075722515, -1.4193234201313905, -2.318906286693168]	-2.56158e+16	-0.23610423505306244	0	besser als angegeben!
3619	Tillman "embraced segregation as divinely imperative".	Tillman "umarmte die Segregation als g√∂ttlichen Imperativ".	[64, 55, 46]	55	[-3.1041256313457515, -2.4215693775738267, -2.0027727411686973]	-2.50949e+16	-0.29369187355041504	0
3790	The township is also known as KwaHove after the pioneer businessman the late Mr Hove.	Die Gemeinde ist auch bekannt als KwaHove nach dem Pionier Gesch√§ftsmann der verstorbene Herr Hove.	[55, 59, 51]	55	[-3.9465199075722515, -3.057809504626008, -1.9396610105563423]	-2981330140918200	-0.2912740409374237	0
4275	Carpenter hits grand slam in 11th to beat Blue Jays	Carpenter trifft Grand Slam in 11. Blue Jays schlagen	[100, 89, 78, 35, 13, 15]	55	[0.2654514735602496, -0.13382149032827656, -0.23458970556018363, -1.4963298067383144, -2.403216996831205, -1.966067586441248]	-0.9947623520564964	-0.29931530356407166	0
3494	9 Purdue in the Big Ten Tournament, the Spartans fell to Penn State in the semifinals.	9 Purdue in der Big Ten Turnier, fielen die Spartaner an Penn State im Halbfinale.	[73, 68, 77, 51, 34, 30]	55.5	[-2.261731355119251, -1.1854504325226372, -1.2076614543774775, -0.8519116139039844, -1.5298618370115828, -1.4252241913153814]	-1410306814041710	-0.3661936819553375	0	44289
4345	In lancet three another cavalier kneels, this one bearing the arms of L√©zongar and Pratanras.	In Lanzette kniet drei weitere Cavalier, diese tr√§gt die Arme von L√©zongar und Pratanras.	[100, 93, 100, 10, 19, 11]	55.5	[0.2654514735602496, 0.22412516435479046, 0.37321150863630664, -2.503233233041955, -2.153686951168456, -2.110292491808146]	-0.9840707549112017	-0.3656822741031647	0
1089	Stephen's armies again broke into the Ottoman Empire, but they could not recapture Chilia or Cetatea Alb«é.	Stephans Armeen brachen wieder in das Osmanische Reich, aber sie konnten nicht zur√ºckerobern Chilia oder Cetatea Albanien.	[58, 56, 53]	55.6667	[-1.3336278023145798, -2.326483304877581, -3.3553413824758795]	-233848416322268	-0.42948010563850403	0
1974	Bodices remained at the natural waistline, necklines varied, while sleeves began under the shoulder line.	Die K√∂rper blieben an der nat√ºrlichen Taille, die Halsketten variierten, w√§hrend die √Ñrmel unter der Schulterlinie begannen.	[56, 69, 42]	55.6667	[-3.0868813914635793, -1.0903643598263917, -2.6023845452415024]	-2259876765510490	-0.3703908324241638	1
3024	Some deep ecologists, such as the radical thinker and polemicist Pentti Linkola, see human overpopulation as a threat to the entire biosphere.	Einige tiefe √ñkologen, wie der radikale Denker und Polemiker Pentti Linkola, sehen die menschliche √úberbev√∂lkerung als Bedrohung f√ºr die gesamte Biosph√§re.	[56, 63, 48]	55.6667	[-3.0868813914635793, -0.4553477458363604, -2.261306907445122]	-1.93451e+16	-0.25403907895088196	1
3109	He was retained for the Third Test but injured himself early in the match while fielding and neither batted nor bowled.	Er wurde f√ºr den dritten Test beibehalten, verletzte sich aber fr√ºh im Spiel w√§hrend des Feldes und weder gestochen noch gebeugt.	[56, 70, 41]	55.6667	[-3.852920543547085, -1.2608678885313718, -2.318906286693168]	-2477564906257200	-0.6537371277809143	0
2103	In 1977, he directed and starred in The Gauntlet opposite Locke, Pat Hingle, William Prince, Bill McKinney, and Mara Corday.	1977 drehte und spielte er in The Gauntlet gegen√ºber Locke, Pat Hingle, William Prince, Bill McKinney und Mara Corday.	[52, 60, 56]	56	[-2.0149956336325174, -1.9461390140925998, -3.852920543547085]	-2.60469e+16	-0.1778271347284317	0	besser als angegeben!
2118	857 Doctor Ross and the Orbits Cat Squirrel / The Sunnyland 1961	857 Doktor Ross und das Orbits Cat Squirrel / The Sunnyland 1961	[56, 56, 56]	56	[-3.852920543547085, -3.0868813914635793, -1.445151958790266]	-2.79498e+16	-0.18291586637496948	0
30	Plum Borough School District encompasses approximately 28 sqmi.	Plum Borough School District umfasst etwa 28 qm.	[64, 49, 57]	56.6667	[-1.0297319696340956, -1.014953774520161, -2.9973947277928126]	-1.68069e+16	-0.3705615997314453	1
1532	She instantly regrets it, and confides in Michelle, who persuades Carla not to tell Nick.	Sie bedauert es sofort und vertraut Michelle an, die Carla davon √ºberzeugt, Nick nicht zu sagen.	[57, 62, 51]	56.6667	[-3.759321179521918, -2.806759186582424, -1.7239623499794816]	-2.76335e+16	-0.3487947881221771	0
2131	Alternative spellings with y in place of either or both is‚Äîtympani, tympany, or timpany‚Äîare occasionally encountered in older English texts.	Alternative Schreibweisen mit y anstelle von Beidem oder Beidem finden sich gelegentlich in √§lteren englischen Texten.	[51, 62, 57]	56.6667	[-2.0893013294497687, -1.755966868700109, -3.759321179521918]	-2.53486e+16	-0.8076154589653015	0
2871	Rick, overcome with rage, bites one of the bandits' jugular vein, which distracts the other bandits.	Rick, √ºberw√§ltigt von Wut, bei√üt eine der Banditen 'Jonglea, die die anderen Banditen ablenkt.	[45, 68, 57]	56.6667	[-4.882513547823918, -2.304658550495256, -1.6235459624094217]	-2936906020242860	-0.48070478439331055	0
3825	They grew barley, chickpeas, lentils, wheat, dates, onions, garlic, lettuce, leeks and mustard.	Sie wuchsen Gerste, Kichererbsen, Linsen, Weizen, Datteln, Zwiebeln, Knoblauch, Salat, Lauch und Senf.	[57, 64, 49]	56.6667	[-2.9973947277928126, -0.40686164327045166, -2.2044606344790583]	-1.86957e+16	-0.1453155279159546	1
6856	She can erect a pink orbicular shield around her and her fellow Mysticons.	Sie kann um sie und ihre Mitmenschen Mysticons einen rosa orbikul√§ren Schild errichten.	[57, 62, 51]	56.6667	[-3.759321179521918, -2.549961409438979, -1.9396610105563423]	-2.74965e+16	-0.4352063238620758	0
700	Fought on October 2, 1863, at Lookout Mountain, Tennessee.	Gefunden am 2. Oktober 1863, am Lookout Mountain, Tennessee.	[100, 91, 75, 30, 20, 25]	56.8333	[0.2654514735602496, 0.04515183701325695, -0.5198479236489196, -1.6977104919990424, -2.1120986102246646, -1.6055053230240035]	-0.9374265063871873	-0.3189690411090851	1
990	Single, and double sculls are usually steered by the scullers pulling harder on one side or the other.	Einzelne und doppelte Sch√§del werden in der Regel von den Sch√§delern gelenkt, die auf der einen oder anderen Seite h√§rter ziehen.	[100, 99, 96, 8, 24, 15]	57	[0.2654514735602496, 1.7622178210609687, 0.4925851553670907, -2.583785507146246, -1.9457452464494982, -1.966067586441248]	-0.6625573150081139	-0.4209829568862915	1
1240	Sultan Ghiyasuddin Azam began sending envoys to the neighboring Jaunpur Sultanate.	Sultan Ghiyasuddin Azam begann Senden Gesandter in das benachbarte Sultanat Jaunpur.	[57, 44, 70]	57	[-3.759321179521918, -4.160721355512781, -0.93863002475776]	-2.95289e+16	-0.2126128226518631	0
1942	Labori reproached Demange about his excessive caution.	Labori warf Demange seine √ºbertriebene Vorsicht vor.	[54, 57, 60]	57	[-3.265854718805113, -1.4801243395701933, -1.9461390140925998]	-2230706024155960	-0.2727985382080078	0	ist doch gut übersetzt?
3139	The Encyclopedia of Phobias, Fears, and Anxieties.	Die Enzyklop√§die der Phobien, √Ñngste und √Ñngste.	[57, 66, 48]	57	[-2.9973947277928126, -0.30988943813863423, -2.261306907445122]	-1.8562e+16	-0.17030420899391174	0	? Nicht falsch, nur falsche Vokabel
38	Sophomore Jacory Harris directed the newly implemented offense.	Sophomore Jacory Harris leitete die neu umgesetzte Straftat.	[48, 58, 67]	57.6667	[-4.601715455748418, -2.1363111594850905, -0.8317690981739914]	-25232652378025	-0.22819635272026062	1
3267	Other sounds produced include purring, puffing, bleating and humming.	Weitere Sounds sind Schnurren, Puffing, Bluten und Summen.	[58, 57, 58]	57.6667	[-3.6657218154967515, -2.9973947277928126, -1.3605759076103077]	-2.67456e+16	-0.4446175992488861	1
4473	Raiola later took out his frustration on Patriots defensive lineman Zach Moore by punching him in the back of the helmet.	Raiola sp√§ter nahm seine Frustration auf Patriots defensive Lineman Zach Moore, indem er ihn in den R√ºcken des Helms.	[100, 95, 89, 31, 11, 20]	57.6667	[0.2654514735602496, 0.40309849169632395, 0.8113570940985152, -1.6574343549468968, -2.4863936787187884, -1.7857864547326259]	-0.741617904840537	-0.239518940448761	0
5603	Dimercaprol used alone may also redistribute lead to the brain and testes.	Dimercaprol allein verwendet kann auch umverteilen Blei auf das Gehirn und Hoden.	[58, 61, 54]	57.6667	[-3.6657218154967515, -2.6394480731097456, -2.9726532719696293]	-3092607720192040	-0.39296573400497437	0
5850	The convertible and hardtop were the sportiest of the final 100 in wheelbase Rambler Americans, and arguably the most desirable now.	Das Cabrio und Hardtop waren die sportlichsten der letzten 100 in Radstand Rambler Amerikaner, und wohl die w√ºnschenswertesten jetzt.	[54, 58, 61]	57.6667	[-3.265854718805113, -1.4190252956250873, -1.8510529413963546]	-2.17864e+16	-0.33059147000312805	0
1398	He characterized it as guessing and as inference to an explanatory hypothesis.	Er bezeichnete es als Raten und als R√ºcksicht auf eine erkl√§rende Hypothese.	[58, 57, 59]	58	[-2.907908064122046, -2.231397232181336, -1.305435251280939]	-2148246849194770	-0.5065382719039917	1
2872	Horace Wilkinson BridgeA cantilevered through truss bridge, carrying six lanes of Interstate 10 between Baton Rouge and Port Allen in Louisiana.	Horace Wilkinson BridgeA freilegte durch die Truss-Br√ºcke und trug sechs Fahrspuren der Interstate 10 zwischen Baton Rouge und Port Allen in Louisiana.	[58, 72, 44]	58	[-3.6657218154967515, -0.9439568253313346, -4.313061094843928]	-2974246578557330	-0.3506312072277069	0
6136	Studies in the Late Roman, Sasanian, and Early Islamic Near East, Wellem Verlag, D√ºsseldorf 2010, pp.	Studium im Sp√§tr√∂mischen, Sasanianischen und Fr√ºhislamischen Nahen Osten, Wellem Verlag, D√ºsseldorf 2010, S.	[58, 54, 62]	58	[-2.907908064122046, -1.6634214714055113, -1.755966868700109]	-2109098801409220	-0.3179561495780945	0
6303	During the Oriskany action, the besieged Americans staged a sortie from Fort Stanwix and raided the nearly empty Indian camp.	W√§hrend der Oriskany-Aktion inszenierten die belagerten Amerikaner ein Sortie aus Fort Stanwix und durchsuchten das fast leere indische Lager.	[58, 60, 56]	58	[-3.6657218154967515, -2.7289347367805123, -1.470857220269045]	-2621837924182100	-0.32704779505729675	1
3390	The cedent cannot cede the same claim more than once; nor can he confer upon the cessionary any greater right than the cessionary has himself.	Der Zeder kann denselben Anspruch nicht mehr als einmal aufgeben; er kann dem Zaren auch kein gr√∂√üeres Recht verleihen als der Z√∂llner selbst.	[100, 100, 100, 5, 32, 12]	58.1667	[0.2654514735602496, 0.8505318100501577, 0.37321150863630664, -2.704613918302683, -1.613038518899166, -2.0742362654664213]	-0.817115651736926	-0.614508330821991	1
4650	The Spartans defeated the previously unbeaten Indiana State Sycamores, led by future Hall of Famer Larry Bird.	Die Spartaner besiegten die bisher ungeschlagenen Indiana State Sycamores, angef√ºhrt von der zuk√ºnftigen Hall of Famer Larry Bird.	[59, 47, 70]	58.6667	[-2.818421400451279, -1.2311253868908998, -1.0106889021917267]	-1686745229844630	-0.27767622470855713	0
1327	It came into conflict with the Green Lantern Corps when Guy Gardner sickened the city, humiliating it and gaining its eternal ire.	Sie geriet in Konflikt mit dem Green Lantern Corps, als Guy Gardner die Stadt krank machte, dem√ºtigte und ihren ewigen Zorn erlangte.	[59, 63, 55]	59	[-2.818421400451279, -1.6608807960038638, -1.5259978765984137]	-2001766691017850	-0.320728063583374	0
1891	For open landings, a newel may extend below the landing for a decorative newel drop.	Bei offenen Landungen kann sich ein Newel unterhalb der Landung f√ºr einen dekorativen Newel-Tropfen ausdehnen.	[51, 67, 59]	59	[-2.0893013294497687, -1.2805365052188824, -3.572122451471585]	-2313986762046740	-0.5485461950302124	0
1932	However, adverbs used like appositions take the comma.	Jedoch nehmen Adverbien, die wie Appositionen benutzt werden, das Komma.	[59, 70, 48]	59	[-3.572122451471585, -0.9952782871301464, -2.261306907445122]	-2.27624e+16	-0.3513248860836029	1
2433	HBO released a statement on January 22 confirming they could not televise the bout in the US.	HBO ver√∂ffentlichte eine Erkl√§rung am 22. Januar best√§tigt, dass sie nicht im Fernsehen den Kampf in den USA.	[62, 68, 47]	59	[-2.549961409438979, -1.1854504325226372, -2.3181531804111852]	-2.01786e+16	-0.39980360865592957	0
4468	Behold the famous, innocent monsters, Gorma 3 Stooges".	Siehe, die ber√ºhmten, unschuldigen Monster, Gorma 3 Stooges ".	[64, 45, 68]	59	[-2.3709880820974454, -2.213312866911466, -1.1854504325226372]	-1.92325e+16	-0.2107955515384674	0
5992	Then Gil Reese returned a punt for 63 yards and the touchdown.	Dann gab Gil Reese einen Punt f√ºr 63 Yards und den Touchdown zur√ºck.	[74, 44, 59]	59	[-1.4761214453897777, -2.2744119108565717, -2.0412250867888453]	-1.93059e+16	-0.4303513169288635	0
6952	Along with the other LCL hopefuls, Playford journeyed around the electorate advocating his platform.	Zusammen mit den anderen hoffnungsvollen LCL reiste Playford durch die W√§hlerschaft, die seine Plattform bef√ºrwortete.	[59, 60, 58]	59	[-3.572122451471585, -2.7289347367805123, -1.3336278023145798]	-2.54489e+16	-0.3759390413761139	0
3362	Disgusted, Chelsea bitterly broke up with Phillip.	Ersch√ºttert zerbrach Chelsea bitterlich mit Phillip.	[100, 90, 80, 41, 24, 20]	59.1667	[0.2654514735602496, -0.0443348266575098, -0.04441756016769294, -1.2546729844254405, -1.9457452464494982, -1.7857864547326259]	-0.8015842664787529	-0.5209607481956482	0
5249	However, a loss to the Patriots derailed any further postseason hopes.	Doch ein Verlust f√ºr die Patrioten entgleist jede weitere Nachsaison Hoffnungen.	[100, 81, 91, 40, 23, 20]	59.1667	[0.2654514735602496, 0.05066851252855241, 0.04515183701325695, -1.2949491214775863, -1.9873335873932898, -1.7857864547326259]	-0.7844662234169072	-0.39310428500175476	0
5186	U.S. Department of Agriculture, Agriculture Handbook 271.	U.S. Department of Agriculture, Agriculture Handbook 271.	[80, 100, 95, 41, 28, 13]	59.5	[-0.04441756016769294, 0.2654514735602496, 0.40309849169632395, -1.2546729844254405, -1.779391882674332, -2.038180039124697]	-0.7413520835225982	-0.18168094754219055	0
21	As a final disastrous coda to the expedition, Thucydides mentions the fate of a squadron of fifty triremes sent to relieve the Siege of Prosopitis.	Als letzte katastrophale Coda zur Expedition erw√§hnt Thucydides das Schicksal einer Staffel von f√ºnfzig Triremen, die zur Linderung der Belagerung der Prosopitis geschickt wurden.	[60, 59, 60]	59.6667	[-1.2502945949515705, -0.5115584708037272, -2.7289347367805123]	-1.49693e+16	-0.30330806970596313	0
121	Robbie Ross, Jr. and Jonathan Aro saved the bullpen, by pitching 3 innings each but giving up four more runs.	Robbie Ross, Jr. und Jonathan Aro retteten den Stift, indem sie jeweils 3 Innings aufbauten, aber vier weitere L√§ufe aufgeben.	[57, 62, 60]	59.6667	[-2.650740317140757, -2.5285121413315204, -3.478523087446418]	-2885925181972890	-0.3941228687763214	0
711	Bigelow spun on his warm up lap, and Sessions waved off.	Bigelow drehte sich auf seiner Warm Up Runde und Sessions winkten ab.	[60, 63, 56]	59.6667	[-3.478523087446418, -2.460474745768212, -2.758044635417048]	-289901415621056	-0.3594699800014496	0
2894	Early Egyptians also knew how to fasten the planks of this ship together with mortise and tenon joints.	Die fr√ºhen √Ñgypter wussten auch, wie man die Planken dieses Schiffes zusammen mit Tendel- und Tendelgelenken befestigte.	[72, 60, 47]	59.6667	[-0.9439568253313346, -2.9741260652781465, -2.3865241127187735]	-2101535667776080	-0.5241893529891968	1
3164	At the inaugural festival 'For The Hornets' headlined and the cathedral flew the pride rainbow flag.	Beim Er√∂ffnungsfest "For The Hornets" flogen Headliner und die Kathedrale mit der stolzen Regenbogenfahne.	[50, 69, 60]	59.6667	[-4.414516727698085, -1.4193234201313905, -1.186543170060289]	-2340127772629920	-0.4910837709903717	0
4478	The ore is massive and disseminated sulfides in hornblende schist of Precambrian or Paleozoic age.	Das Erz ist massiv und verbreitet Sulfide in hornblende Schist von Precambrian oder Pal√§ozoic Alter.	[100, 80, 78, 25, 40, 35]	59.6667	[0.2654514735602496, -0.9392014633651773, -1.4678241570166428, -1.8990911772597705, -1.2803317913488337, -1.244943059606759]	-1.09432e+16	-0.2861417829990387	0
4699	Olmstead's "First Volunteer Regiment of Georgia" would garrison Fort Pulaski through the Federal siege.	Olmstead 's "First Volunteer Regiment of Georgia" w√ºrde Garnison Fort Pulaski durch die Federal Belagerung.	[60, 67, 52]	59.6667	[-3.478523087446418, -1.7362344833314276, -3.6435935800610375]	-2.95278e+16	-0.22216105461120605	0
5516	The Prussian led the Fusilier battalions Greiffenberg Nr.	Der Preu√üische f√ºhrte die Fusilier Bataillone Greiffenberg Nr.	[73, 60, 46]	59.6667	[-0.7100200690414104, -2.7289347367805123, -2.0027727411686973]	-1.81391e+16	-0.2543315291404724	0
14	The cover depicted a photograph of The Huxtables with a cracked frame, symbolizing the show's damaged and complicated legacy.	Das Cover zeigt ein Foto von The Huxtable mit einem geknackten Rahmen, das das besch√§digte und komplizierte Erbe der Serie symbolisiert.	[53, 67, 60]	60	[-1.636279189257151, -0.10884222783058023, -2.7289347367805123]	-1.49135e+16	-0.4218999147415161	1	?
208	On July 16, 2016 Korn premiered a new song, "Rotting in Vain", at Chicago Open Air Festival.	Am 16. Juli 2016 uraufgef√ºhrt Korn einen neuen Song, "Rotting in Vain", auf Chicago Open Air Festival.	[60, 58, 62]	60	[-3.478523087446418, -2.907908064122046, -2.1142187257593044]	-2833549959109250	-0.2873397171497345	0
853	Dense thickets of Sitka alder and devil's club abound along the shoreline.	An der K√ºste gibt es dichtes Dickicht von Sitka Erle und Teufelsklub.	[60, 71, 49]	60	[-3.478523087446418, -1.1024123569313533, -3.894643898104621]	-2.82519e+16	-0.49030616879463196	0
1938	Gabe develops a close bond with Pirate, whom he renames Firefly.	Gabe entwickelt eine enge Verbindung zu Piraten, die er Firefly umbenennt.	[60, 69, 51]	60	[-2.7289347367805123, -1.0903643598263917, -2.0907680885469317]	-1.97002e+16	-0.3905935287475586	0
1950	The military faced insurrections and separatist movements in Tabasco, Yucat√°n, and Texas.	Das Milit√§r sah sich Aufst√§nden und separatistischen Bewegungen in Tabasco, Yucat√°n und Texas gegen√ºber.	[51, 69, 60]	60	[-3.534314709817413, -1.0903643598263917, -1.5791516318523608]	-2.06794e+16	-0.19693028926849365	0		guess it's ok, because the meaning is preserved
2246	A squire Knut Madsson in Lund uses the same coat of arms.	Ein Knut Madsson in Lund benutzt das gleiche Wappen.	[60, 62, 58]	60	[-2.7289347367805123, -1.1746291198446632, -2.1363111594850905]	-2.01329e+16	-0.38882070779800415	1
2256	The Chemical Brothers headlined the O2 Stage beginning with "Galvanize".	Die Chemical Brothers √ºberschrieben die O2 Stage, beginnend mit "Galvanisieren".	[100, 90, 72, 45, 28, 25]	60	[0.2654514735602496, -0.0443348266575098, -0.8051061417376557, -1.093568436216858, -1.779391882674332, -1.6055053230240035]	-0.8437425227916849	-0.4621402323246002	0
2695	A handwriting expert swore that the Claimant's writing resembled Orton's but not Roger Tichborne's.	Ein handschriftlicher Experte schwor, dass das Schreiben des Claimant Orton √§hnelte, aber nicht Roger Tichborne.	[60, 52, 68]	60	[-3.478523087446418, -4.113067457331706, -1.6115940874402417]	-3067728210739450	-0.344915509223938	0
4414	Leonard outpointed Murphy throughout the six round contest landing more and better blows.	Leonard wies Murphy w√§hrend der sechs Runde Wettbewerb Landung mehr und bessere Schl√§ge.	[100, 94, 87, 35, 19, 25]	60	[0.2654514735602496, -0.1288891274508614, 0.6211849487060245, -1.4963298067383144, -2.153686951168456, -1.6055053230240035]	-0.7496291310192268	-0.34583818912506104	0
5918	He wore Essex to starboard and cut away the wreckage.	Er trug Essex an Steuerbord und schnitt die Tr√ºmmer weg.	[60, 62, 58]	60	[-2.7289347367805123, -1.1746291198446632, -2.1363111594850905]	-2.01329e+16	-0.34921181201934814	1
6419	English batsman Sir David Serjeant said that Wills was the only bowler he ever feared.	Der englische Batsman Sir David Serjeant sagte, Wills sei der einzige Bowler, den er je bef√ºrchtete.	[60, 69, 51]	60	[-3.478523087446418, -1.0903643598263917, -1.9396610105563423]	-2.16952e+16	-0.3449436128139496	1	?
6439	Amy later chose to nominate Chiara and Roddy for eviction.	Amy entschied sich sp√§ter, Chiara und Roddy f√ºr die R√§umung zu nominieren.	[50, 60, 70]	60	[-4.429978520531743, -2.9741260652781465, -0.6774931089219965]	-2693865898243960	-0.3163028955459595	1	?
1476	Newport reliever Geoff Brown pitched four innings of shutout relief, allowing only one hit in four innings after replacing Brad Mincey in the sixth.	Newport Reliefs Geoff Brown schlug vier Innings Shutout Relief, so dass nur ein Hit in vier Innings nach dem Austausch Brad Mincey in der sechsten.	[100, 73, 86, 40, 44, 20]	60.5	[0.2654514735602496, -1.5656081090605445, 0.5260988760097791, -1.2949491214775863, -1.1139784275736675, -1.7857864547326259]	-0.8281286272123992	-0.2004232406616211	0
4170	For no cause or infirmity should you consult magicians, diviners, sorcerers or incantators.	Ohne Ursache oder Krankheit solltet ihr Zauberer, Wahrsager, Zauberer oder Beschw√∂rer konsultieren.	[100, 100, 100, 30, 21, 12]	60.5	[0.2654514735602496, 0.8505318100501577, 0.37321150863630664, -1.6977104919990424, -2.070510269280873, -2.0742362654664213]	-0.7255437057499371	-0.3868662118911743	1	gutes Beispiel!
53	However, Crapp did not capitalise as Toshack conceded only eight runs in a sequence of eight overs.	Allerdings kapitalisierte Crapp nicht, da Toshack nur acht L√§ufe in einer Folge von acht Overs zugestanden hatte.	[61, 53, 68]	60.6667	[-1.8510529413963546, -3.3553413824758795, -1.1243814481238537]	-2.11026e+16	-0.42407187819480896	0
916	Dylan and Baez toured together again in 1984 with [[Carlos Santana]].<ref name = GrayBaez/>	[[Carlos Santana]] ist 1984 mit [[GrayBaez]] auf Tournee.	[61, 71, 50]	60.6667	[-3.3849237234212515, -0.9001922144339011, -4.429978520531743]	-2.90503e+16	-0.5306968688964844	1
2498	Saint Thomas Christians West Syriac Rite Mar Thoma Throne Rogation days List of Marthoma Syrian Christians	Saint Thomas Christen West Syrischer Ritus Mar Thoma Throne Rogation Tage Liste der Marthoma Syrischen Christen	[72, 61, 49]	60.6667	[-0.8051061417376557, -2.6394480731097456, -2.2044606344790583]	-1.883e+16	-0.31724080443382263	0
4492	Interlude "The One" accompanies Jackson's final monologue of romance with flourishes of electronic music.	Interlude "The One" begleitet Jacksons letzten Monolog der Romantik mit Aufbl√ºhen elektronischer Musik.	[61, 54, 67]	60.6667	[-3.3849237234212515, -1.5566761152659523, -1.7362344833314276]	-2.22594e+16	-0.34608814120292664	0
5067	Sertorian War, Third Servile War and first consulship	Sertorian War, Third Servile War und erstes Konsulat	[89, 100, 100, 31, 24, 20]	60.6667	[0.8113570940985152, 0.2654514735602496, 0.8505318100501577, -1.6574343549468968, -1.9457452464494982, -1.7857864547326259]	-0.5769376130700165	-0.29919320344924927	0
5741	It began by chronicling the defections of the Reformed Presbyterian Church, since 1806, in matters of doctrine.	Es begann mit der Chronik der Ausf√§lle der reformierten Presbyterianischen Kirche, seit 1806, in Fragen der Lehre.	[61, 70, 51]	60.6667	[-3.3849237234212515, -1.2608678885313718, -1.7229256989916528]	-2.12291e+16	-0.3880954086780548	0
5846	From 31 March 2015, 86101 shunts the empty sleeper coaching stock into London Euston alongside 87002.	Ab 31. M√§rz 2015 schickt 86101 neben 87002 den leeren Schlafcoaching-Bestand nach London Euston.	[61, 69, 52]	60.6667	[-3.3849237234212515, -1.4193234201313905, -2.3328798256729266]	-2.37904e+16	-0.4463997483253479	0
5177	Michael dotes on his daughter, but Natasha often embarrasses him to get his attention.	Michael schimpft auf seine Tochter, aber Natasha verleumdet ihn oft, um seine Aufmerksamkeit zu bekommen.	[88, 100, 92, 25, 40, 20]	60.8333	[0.7162710214022698, 0.2654514735602496, 0.1346385006840237, -1.8990911772597705, -1.2803317913488337, -1.7857864547326259]	-0.6414747379491145	-0.4778616726398468	1
1468	It lies between latitudes 42¬∞ and 43¬∞ N, and longitudes 20¬∞ and 22¬∞ E.	Es liegt zwischen Breiten 42 ¬∞ und 43 ¬∞ N, und L√§ngen 20 ¬∞ und 22 ¬∞ E.	[61, 67, 55]	61	[-2.6394480731097456, -1.2805365052188824, -1.5259978765984137]	-1.81533e+16	-0.28427112102508545	0
1490	Suddenly, Spangles peels off his head to reveal an alien underneath it.	Pl√∂tzlich sch√§lt Spangles seinen Kopf ab, um einen Alien darunter zu enth√ºllen.	[61, 68, 54]	61	[-2.6394480731097456, -1.1854504325226372, -1.5811385329277825]	-1.80201e+16	-0.40944889187812805	0	eigentlich gut
2257	Anderson's, Bryan's, Benning's, and Crews' cavalry brigade.	Anderson 's, Bryan' s, Benning 's und Crews' cavalry brigade.	[61, 71, 51]	61	[-3.3849237234212515, -2.0536082324516722, -2.0893013294497687]	-2509277761774230	-0.16551156342029572	0
2691	He developed the character as a villain in Captain Marvel, a monthly comic he wrote and penciled for Marvel Comics through July 1974.	Er entwickelte die Figur als B√∂sewicht in Captain Marvel, einem monatlichen Comic, den er bis Juli 1974 f√ºr Marvel Comics schrieb und schrieb.	[61, 74, 48]	61	[-3.3849237234212515, -0.614933996345165, -2.261306907445122]	-2.08705e+16	-0.3121660053730011	1
4256	She retired due to an injury against third seed Samantha Stosur in the semifinals.	Sie zog sich aufgrund einer Verletzung des dritten Samantha Stosur im Halbfinale zur√ºck.	[61, 68, 54]	61	[-2.6394480731097456, -1.1854504325226372, -1.5811385329277825]	-1.80201e+16	-0.2964017391204834	0
5205	Matt then detained Daniel for jaywalking, while the raid went ahead, which infuriated him.	Matt sperrte Daniel dann f√ºr Jaywalking ein, w√§hrend der √úberfall vor sich ging, was ihn w√ºtete.	[61, 72, 50]	61	[-3.3849237234212515, -0.9439568253313346, -3.8109604587567603]	-2713280335836440	-0.5455390810966492	0
5296	Karl rescues the esky and he and Susan bury Audrey at Sonya's nursery.	Karl rettet den Eseligen und er und Susan begraben Audrey in Sonyas Kindergarten.	[61, 48, 74]	61	[-3.3849237234212515, -4.746889583731781, -0.614933996345165]	-2915582434499390	-0.3740099370479584	0
4651	Pip's reluctance completely disappears and he embraces Magwitch.	Pips Widerwille verschwindet v√∂llig und er umarmt Maghexe.	[45, 67, 72]	61.3333	[-2.535135504353276, -1.8345317446803386, -0.9439568253313346]	-1.77121e+16	-0.3802889585494995	0
34	On 17 January around 100 bombers dropped a high concentration of incendiaries, some 32,000 in all.	Am 17. Januar warfen rund 100 Bomber eine hohe Brandkonzentration ab, insgesamt etwa 32.000.	[55, 68, 62]	61.6667	[-1.5259978765984137, -0.05850269745893685, -2.549961409438979]	-1.37815e+16	-0.4765413999557495	1	?
749	Other than an unreleased jam session in 1974, later bootlegged as A Toot and a Snore in '74, Lennon and McCartney never recorded together again.	Abgesehen von einer unver√∂ffentlichten Jam-Session 1974, die sp√§ter als A Toot und Snore in '74 bootlegged wurde, haben Lennon und McCartney nie wieder zusammen aufgenommen.	[69, 62, 54]	61.6667	[-1.0019344653211597, -1.755966868700109, -3.265854718805113]	-2007918684275460	-0.34626901149749756	0
2979	He bucked Dirteater off in 7.19 seconds; Bruiser almost got ridden for 8 seconds.	Er bucked Dirteater off in 7,19 Sekunden; Bruiser fast f√ºr 8 Sekunden geritten.	[62, 74, 49]	61.6667	[-3.291324359396085, -0.6270457621312975, -3.7132880371589465]	-2543886052895440	-0.26417842507362366	0
3384	MGM marketers enticed the public with the tagline "Garbo talks!"	MGM Vermarkter verlockten die √ñffentlichkeit mit dem Schlagwort "Garbo spricht!"	[50, 73, 62]	61.6667	[-2.2389799062591984, -0.7100200690414104, -2.549961409438979]	-1832987128246520	-0.4253206253051758	1	?
3563	The Tyroshi often wear forked beards and pointed mustaches dyed in bright colors.	Die Tyroshi tragen oft gegabelte B√§rte und spitz gef√§rbte Schnurrb√§rte.	[71, 52, 62]	61.6667	[-0.9001922144339011, -1.6682002717416387, -1.140013282292833]	-1236135256156120	-0.4967082738876343	1
4274	Whereas, in the hatchback, the rear 65/35 split seatbacks fold down, offering 52.4 cu.	W√§hrend in der hatchback, die hinteren 65 / 35 Split-Sitzen falten sich nach unten und bietet 52,4 cu.	[100, 78, 83, 35, 44, 30]	61.6667	[0.2654514735602496, -1.1181747907067108, 0.2408406579210431, -1.4963298067383144, -1.1139784275736675, -1.4252241913153814]	-0.7745691808087969	-0.5457245111465454	0
4419	The Catholic League's army pacified Upper Austria, while Imperial forces under Johan Tzerclaes, Count of Tilly, pacified Lower Austria.	Die Armee des Katholischen Bundes beruhigte Ober√∂sterreich, w√§hrend kaiserliche Truppen unter Johan Tzerclaes, Graf von Tilly, Nieder√∂sterreich befriedeten.	[72, 62, 51]	61.6667	[-0.8051061417376557, -2.549961409438979, -2.7879787658052377]	-2047682105660620	-0.2753940224647522	0
4577	The Sheriff's department brought the defendants to Court in a patrol wagon guarded by two carloads of deputies armed with automatic shotguns.	Der Sheriff Abteilung brachte die Angeklagten vor Gericht in einem Patrouillenwagen bewacht von zwei Carloads von Abgeordneten mit automatischen Gewehre bewaffnet.	[74, 100, 90, 35, 46, 25]	61.6667	[-0.614933996345165, 0.2654514735602496, -0.0443348266575098, -1.4963298067383144, -1.0308017456860843, -1.6055053230240035]	-0.7544090374818045	-0.32351401448249817	0
4880	Traditionally, pranksters used hollowed out turnips or mangel wurzels often carved with grotesque faces as lanterns.	Traditionell wurden R√ºben oder Mangelwurzeln oft mit grotesken Gesichtern als Laternen ausgeh√∂hlt.	[62, 70, 53]	61.6667	[-3.291324359396085, -1.2608678885313718, -2.2512092727696396]	-2267800506899030	-0.4400930106639862	1
6597	Pollinators find flowers through bright colorations, including ultraviolet, and attractant pheromones.	Pollinators finden Blumen durch helle Farben, einschlie√ülich Ultraviolett und attraktive Pheromone.	[100, 91, 77, 31, 46, 25]	61.6667	[0.2654514735602496, 0.04515183701325695, -0.32967577825642896, -1.6574343549468968, -1.0308017456860843, -1.6055053230240035]	-0.7188023152233178	-0.3621367812156677	0
4523	Carney, the other curate, and the Auxiliaries proceeded to search Fr.	Carney, das andere Kurat, und die Auxili√§re suchten nach Fr.	[74, 100, 92, 40, 45, 20]	61.8333	[-0.614933996345165, 0.2654514735602496, 0.1346385006840237, -1.2949491214775863, -1.072390086629876, -1.7857864547326259]	-0.7279949474901634	-0.4725210964679718	0
1376	In Eupompha, the male draws his antennae along his longitudinal vertex.	In Eupompha zeichnet das M√§nnchen seine Antennen entlang seines L√§ngsscheitels.	[69, 55, 62]	62	[-1.9235547637436115, -2.4215693775738267, -1.140013282292833]	-1.82838e+16	-0.3672548234462738	0
2529	Melinda felt crushed, especially when Larry remarried.	Melinda f√ºhlte sich zerquetscht, besonders als Larry wieder heiratete.	[62, 70, 54]	62	[-2.549961409438979, -0.9952782871301464, -1.9202292696487413]	-1821822988739280	-0.30207476019859314	1
2596	Walker batted .241 with a .326 OBP and .434 SLG for a 112 OPS+ in his first full season.	Walker hat in seiner ersten vollen Saison .241 mit .326 OBP und .434 SLG f√ºr 112 OPS + gestochen.	[59, 74, 53]	62	[-2.818421400451279, -0.614933996345165, -1.9770755426148048]	-1.80348e+16	-0.3536379337310791	1
5026	Among the Clippers was a novelty pillared coupe, the Sportster, styled to resemble a hardtop.	Unter den Clippers war eine Neuheit pillared Coup√©, der Sportster, Stil √§hnelt einem Hardtop.	[81, 100, 89, 35, 24, 44]	62.1667	[0.05066851252855241, 0.2654514735602496, -0.13382149032827656, -1.4963298067383144, -1.9457452464494982, -0.9204370225312389]	-0.6967022633264209	-0.33131107687950134	0
19	They bundled him into a field and "tarred and feathered" him.	Sie b√ºndelten ihn in ein Feld und "tarred und gefiedert" ihn.	[71, 54, 63]	62.6667	[-0.643747375328515, -0.7632561226619441, -2.460474745768212]	-1.28916e+16	-0.46303591132164	0
363	Jackson delivers the chorus in a reassuring manner; described as a "sotto voce purr".	Jackson liefert den Refrain beruhigend; als "sotto voce purr" beschrieben.	[63, 74, 51]	62.6667	[-3.197724995370918, -0.6270457621312975, -3.727277019408899]	-2.51735e+16	-0.39149636030197144	0
770	On 4 November 2014, Hollyoaks publicised a storyline dubbed "the gloved hand killer".	Am 4. November 2014 ver√∂ffentlichten Hollyoaks eine Storyline, die als "der finstere Handkiller" bezeichnet wurde.	[63, 71, 54]	62.6667	[-3.197724995370918, -1.1024123569313533, -1.5441315226811982]	-1.94809e+16	-0.367623895406723	1
890	After Oakley committed a flagrant foul on Barkley, Barkley responded by shoving Oakley.	Nachdem Oakley ein flagrantes Foul auf Barkley begangen hatte, reagierte Barkley mit Oakley.	[60, 65, 63]	62.6667	[-2.8454232045315577, -1.6419599044306112, -2.460474745768212]	-231595261824346	-0.33991652727127075	0
2645	A furious Nick sues Sharon for full custody of Faith and wins.	Ein w√ºtender Nick verklagt Sharon f√ºr die volle Obhut des Glaubens und gewinnt.	[95, 96, 87, 30, 48, 20]	62.6667	[-0.20254534656558384, 0.4925851553670907, 0.6211849487060245, -1.6977104919990424, -0.9476250637985012, -1.7857864547326259]	-0.5866495421704397	-0.3965301811695099	1
4197	At higher elevations, such as the crossings of Rosebud and Eagle summits, whiteout blizzards are common.	In h√∂heren Lagen, wie den Kreuzungen von Rosebud und Adlergipfeln, sind wei√üe Schneest√ºrme √ºblich.	[63, 71, 54]	62.6667	[-3.197724995370918, -0.9001922144339011, -1.781603486482882]	-1.95984e+16	-0.5550764799118042	1	?
4501	Missouri amassed 418 total yards to Oklahoma's 384.	Missouri sammelte insgesamt 418 Meter zu Oklahomas 384.	[64, 74, 50]	62.6667	[-3.1041256313457515, -0.614933996345165, -2.147614361512995]	-1.95556e+16	-0.24700061976909637	0
4617	Panicked, Dexter rushes over with Vogel in tow, and knocks Debra unconscious with a low dose of the tranquilizer he uses on his victims.	In Panik st√ºrzt Dexter mit Vogel im Schlepptau √ºber und schl√§gt Debra bewusstlos mit einer geringen Dosis des Beruhigungsmittels, den er an seinen Opfern verwendet.	[63, 74, 51]	62.6667	[-3.197724995370918, -0.614933996345165, -1.9396610105563423]	-1.91744e+16	-0.4431564211845398	0
5204	Cunningham's comrade in 604, Roderick Aeneas Chisholm, accounted for a 5./KG 54 Ju 88 near Portsmouth.	Cunningham 's Genosse in 604, Roderick Aeneas Chisholm, entfielen auf eine 5. / KG 54 Ju 88 bei Portsmouth.	[74, 51, 63]	62.6667	[-0.6270457621312975, -3.727277019408899, -3.197724995370918]	-2517349258970370	-0.2690761387348175	0
6184	In the 2009 NBA Playoffs, the Mavericks and Spurs squared off again in the first round.	In den 2009 NBA Playoffs haben sich die Mavericks and Spurs in der ersten Runde wieder abgespielt.	[63, 65, 60]	62.6667	[-2.460474745768212, -0.9913319880093451, -1.9461390140925998]	-1.79932e+16	-0.40167662501335144	1	?
6921	Ravenel's endorsement of DeMint proved crucial as the Lowcountry counties heavily went for the Representative from the Upstate.	Ravenels Billigung von DeMint erwies sich als entscheidend, da die Landkreise in Lowcountry stark f√ºr den Repr√§sentanten aus dem Upstate eintraten.	[63, 71, 54]	62.6667	[-3.197724995370918, -1.1024123569313533, -1.5441315226811982]	-1.94809e+16	-0.44537848234176636	1
1102	Kyle Hendricks also shut out the Nationals, pitching seven shutout innings while allowing only two hits.	Kyle Hendricks schloss auch die Nationals, Pitching sieben Shutout Innings, w√§hrend nur zwei Treffer.	[100, 87, 71, 35, 54, 30]	62.8333	[0.2654514735602496, -0.31279481766981004, -0.9001922144339011, -1.4963298067383144, -0.698095018135752, -1.4252241913153814]	-0.7611974291221516	-0.3442915678024292	0
4165	On June 28, 2013 the Atlanta Braves retired former third baseman Chipper Jones' jersey, number 10, before the game against the Arizona Diamondbacks.	Am 28. Juni 2013 zog die Atlanta Braves ehemaligen dritten Baseman Chipper Jones 'Trikot, Nummer 10, vor dem Spiel gegen die Arizona Diamondbacks.	[100, 73, 100, 50, 22, 32]	62.8333	[0.2654514735602496, -1.5656081090605445, 0.37321150863630664, -0.89218775095613, -2.0289219283370814, -1.3531117386319325]	-0.8668610907981887	-0.24471190571784973	0
12	When legendary wrestler Jake Roberts advised Orton not to underestimate The Undertaker, Orton performed an RKO on Roberts as well.	Als der legend√§re Wrestler Jake Roberts Orton riet, The Undertaker nicht zu untersch√§tzen, f√ºhrte Orton ebenfalls einen RKO auf Roberts durch.	[56, 70, 63]	63	[-1.470857220269045, 0.04217636328434989, -2.460474745768212]	-1.29639e+16	-0.2584606409072876	0	?
91	Hitting a downed fighter and grasping below the waist were prohibited.	Es war verboten, einen abgebrochenen K√§mpfer zu schlagen und unter der Taille zu greifen.	[65, 61, 63]	63	[-2.0531455465314647, -2.2215230440355946, -3.197724995370918]	-2490797861979320	-0.6047551035881042	1
859	While screening US cruisers bound for Saipan, Case rammed and sank a Japanese midget submarine.	Beim Screening US-Kreuzer gebunden nach Saipan, Fall gerammt und sank ein japanisches Zwerg U-Boot.	[100, 85, 93, 35, 45, 20]	63	[0.2654514735602496, 0.4310128033135338, 0.22412516435479046, -1.4963298067383144, -1.072390086629876, -1.7857864547326259]	-0.5723194844787071	-0.35281938314437866	0
2009	Many later Dominicans battled heresy as part of their apostolate.	Viele sp√§ter Dominikaner k√§mpften Ketzerei als Teil ihres Apostolats.	[63, 67, 59]	63	[-2.460474745768212, -1.2805365052188824, -1.6359979048184243]	-1.79234e+16	-0.19512294232845306	0
2259	Syllables before double consonants, and most syllables before consonant clusters, count as heavy.	Silben vor doppelten Konsonanten und die meisten Silben vor konsonanten Clustern z√§hlen als schwer.	[63, 63, 63]	63	[-3.197724995370918, -2.460474745768212, -1.0848726259634645]	-2.24769e+16	-0.2808651626110077	0
3639	Clappers and concussion sticks appear on Egyptian vases as early as 3000 BC.	Klappen und Schlagst√∂cke erscheinen bereits 3000 v. Chr. auf √§gyptischen Vasen.	[63, 72, 54]	63	[-2.460474745768212, -0.8051061417376557, -1.5811385329277825]	-1.61557e+16	-0.332273006439209	1
3652	One of General of Division Emmanuel Grouchy's dragoon brigades hewed a path through Hohenlohe's column.	Eine der Dragonbrigaden des Generals der Division Emmanuel Grouchy hat einen Weg durch Hohenlohe 's S√§ule gehauen.	[63, 71, 55]	63	[-2.460474745768212, -0.9001922144339011, -2.433748905600829]	-1.93147e+16	-0.37801262736320496	1
5619	Deprived by the Peruvian Tristan Moscoso clan of a generous annuity arranged by her granduncle, Aline settled in Paris to work as a dressmaker.	Bedr√§ngt vom peruanischen Tristan Moscoso Clan einer gro√üz√ºgigen Rente, arrangiert von ihrem Gro√üonkel, lie√ü sich Aline in Paris nieder, um als Schneiderin zu arbeiten.	[70, 56, 63]	63	[-0.9952782871301464, -1.445151958790266, -1.0848726259634645]	-1.1751e+16	-0.3240014314651489	0
5736	Mistaking the reservoirs of the Lea Valley for the Thames, it dropped its bombs on Walthamstow and Leytonstone.	Die Stauseen des Lea-Tals f√ºr die Themse irrend, warf es seine Bomben auf Walthamstow und Leytonstone ab.	[100, 80, 95, 30, 44, 29]	63	[0.2654514735602496, -0.04441756016769294, 0.40309849169632395, -1.6977104919990424, -1.1139784275736675, -1.4612804176571057]	-0.6081394886901559	-0.3859686851501465	0
6386	Congress publicised the fasts as a political action that generated widespread sympathy.	Der Kongress ver√∂ffentlichte das Fasten als eine politische Aktion, die weit verbreitete Sympathie hervorrief.	[63, 67, 59]	63	[-2.460474745768212, -1.2805365052188824, -1.305435251280939]	-1.68215e+16	-0.40585383772850037	1
6545	As they marry, the nuns reprise "Maria" against the wedding processional.	W√§hrend sie heiraten, reprise die Nonnen "Maria" gegen die Hochzeit Prozession.	[74, 63, 52]	63	[-0.6270457621312975, -2.723075747234563, -2.0149956336325174]	-1.78837e+16	-0.4746798574924469	0
4675	Writs for calling religious clergy to royal courts	Falsch f√ºr Berufung religi√∂sen Klerus an k√∂nigliche Gerichte	[97, 100, 94, 30, 38, 20]	63.1667	[1.572045675668478, 0.2654514735602496, 0.3136118280255572, -1.6977104919990424, -1.3635084732364167, -1.7857864547326259]	-0.4493160737856334	-0.49177148938179016	0
5128	The dean and many of the canons were absentees, so they appointed vicars to act for them locally.	Der Dekan und viele der Kanonen waren Abwesende, also ernannten sie Vikar, um f√ºr sie vor Ort zu handeln.	[100, 75, 99, 40, 40, 25]	63.1667	[0.2654514735602496, -0.5198479236489196, 0.7610451463793909, -1.2949491214775863, -1.2803317913488337, -1.6055053230240035]	-0.6123562565932837	-0.3812999427318573	1
5796	They transported him 175 miles back to Marietta, near Atlanta, where they lynched him in front of a mob.	Sie transportierten ihn 175 Meilen zur√ºck nach Marietta, in der N√§he von Atlanta, wo sie ihn vor einem Mob lynchzten.	[59, 65, 66]	63.3333	[-2.818421400451279, -0.35837554070454297, -1.2380739940559804]	-1.47162e+16	-0.3232165277004242	0
2068	He slid down the banking and into the infield grass as a plume of flames erupted from his car.	Er rutschte das Ufer hinunter und ins Infield Gras, als eine Flamme aus seinem Auto ausbrach.	[70, 62, 78, 51, 70, 50]	63.5	[-2.542529447194751, -2.549961409438979, -0.23458970556018363, -0.8519116139039844, -0.032681563035087305, -0.7040996644808922]	-1152628900602310	-0.5826942920684814	0	Beispiel: Vokabel falsch aber Sinn vollkommen erhalten
3240	As she proceeded on towards Takao harbor, a searchlight suddenly pierced the dark not far ahead, and Tunny dove to avoid detection.	Als sie weiter Richtung Takao Hafen fuhr, durchbohrte pl√∂tzlich ein Suchscheinwerfer die Dunkelheit nicht weit voraus und Tunny Taube, um die Erkennung zu vermeiden.	[100, 93, 83, 45, 35, 25]	63.5	[0.2654514735602496, 0.22412516435479046, 0.2408406579210431, -1.093568436216858, -1.4882734960677912, -1.6055053230240035]	-0.5761549932454283	-0.39837387204170227	0
3285	Jhonny Peralta will take over at shortstop when he comes off the DL, August 2.	Jhonny Peralta √ºbernimmt bei Shortstop, wenn er kommt aus der DL, 2. August.	[100, 86, 91, 51, 22, 31]	63.5	[0.2654514735602496, 0.5260988760097791, 0.04515183701325695, -0.8519116139039844, -2.0289219283370814, -1.3891679649736568]	-0.5722165534385728	-0.3632921576499939	0
3582	The two brawled that ended with Cass standing tall.	Die beiden Schl√§gereien, die mit Cass stand hoch endete.	[100, 91, 83, 50, 32, 25]	63.5	[0.2654514735602496, 0.04515183701325695, 0.2408406579210431, -0.89218775095613, -1.613038518899166, -1.6055053230240035]	-0.593214604064125	-0.4806343615055084	0
3723	In this interlude, Eather patrolled toward Ioribaiwa, both to harass the Japanese and to gather intelligence on their disposition.	In diesem Zwischenspiel patrouillierte Eather in Richtung IoriBaiwa, sowohl um die Japaner zu bel√§stigen als auch um Intelligenz √ºber ihre Disposition zu sammeln.	[100, 82, 78, 51, 45, 25]	63.5	[0.2654514735602496, -0.7602281360236438, -0.23458970556018363, -0.8519116139039844, -1.072390086629876, -1.6055053230240035]	-0.7098622319302402	-0.4129506051540375	1	? Der Sinn ist überwiegend erhalten, aber nicht ganz
4956	Many expressways and parkways in the New York City suburbs were posted as high as 65 mph in the early 1970s.	Viele Schnellstra√üen und Parkh√§user in den Vororten von New York City wurden Anfang der 1970er Jahre mit bis zu 65 mph gebucht.	[75, 67, 82, 50, 42, 65]	63.5	[-2.0745326270689177, -2.102528091085145, 0.14575458522479776, -0.89218775095613, -1.1971551094612505, -0.16325626935502552]	-1047317543783610	-0.4699377119541168	1
931	20 Major Aspects of Liars, Cheats, and Frauds by James Randi"	20 Hauptaspekte von L√ºgen, Betr√ºgern und Betr√ºgern von James Randi "	[64, 74, 53]	63.6667	[-3.1041256313457515, -0.6270457621312975, -3.559910140713176]	-2.43036e+16	-0.2805774509906769	0	? Eigentlich nicht falsch, nur stilistisch nicht richtig
1467	Throughout the whole ordeal Loki regards humans as mere playthings for his pranks.	W√§hrend der ganzen Tortur betrachtet Loki den Menschen als blo√üe Spielsachen f√ºr seine Streiche.	[64, 71, 56]	63.6667	[-2.3709880820974454, -0.9001922144339011, -1.470857220269045]	-1.58068e+16	-0.38589826226234436	0
1716	The two railroads retained their separate identities until merging into the Chessie System on June 15, 1973.	Die beiden Eisenbahnen behielten ihre eigenen Identit√§ten, bis sie am 15. Juni 1973 in das Chessie System verschmolzen.	[64, 64, 63]	63.6667	[-3.1041256313457515, -2.3709880820974454, -1.0548174111253639]	-2.17664e+16	-0.3981193006038666	0	? Ist der Sinn hier hinreichend erhalten?
1755	At the start, Berger raced past Prost while Alesi jumped by both the Ferraris.	Am Anfang raste Berger an Prost vorbei, w√§hrend Alesi von den beiden Ferraris sprang.	[100, 90, 79, 50, 34, 29]	63.6667	[0.2654514735602496, -0.0443348266575098, -0.13950363286393827, -0.89218775095613, -1.5298618370115828, -1.4612804176571057]	-0.6336194985976694	-0.3541392982006073	1
2099	State finances nosedived during the third Edwards administration.	Staatliche Finanzen w√§hrend der dritten Edwards-Verwaltung.	[52, 75, 64]	63.6667	[-3.4448280461466463, -0.5198479236489196, -1.3517665399881071]	-1.77215e+16	-0.5402206778526306	1
2188	Traditional Choral evensong is a staple of most cathedrals.	Traditioneller Chorgesang ist ein Grundpfeiler der meisten Kathedralen.	[58, 69, 64]	63.6667	[-1.5691614587290106, -1.0903643598263917, -3.1041256313457515]	-1.92122e+16	-0.4204210340976715	1
2615	184 Boots Gilbert Sadie And The Cop / When Senorita Comes To Hear The Senor Play 1955	184 Stiefel Gilbert Sadie und der Polizist / wenn Senorita kommt, den Senor zu h√∂ren Spiel 1955	[64, 62, 65]	63.6667	[-3.1041256313457515, -2.549961409438979, -0.974591313304727]	-2.20956e+16	-0.24700503051280975	0
3163	The scope of works necessitated the employment of six sawyers and nineteen plasterers, labourers, and carpenters, and lasted from May to June.	Der Umfang der Arbeiten erforderte den Einsatz von sechs S√§gern und neunzehn Gipsk√∂rpern, Arbeitern und Zimmerleuten und dauerte von Mai bis Juni.	[58, 69, 64]	63.6667	[-1.5691614587290106, -1.0903643598263917, -3.1041256313457515]	-1.92122e+16	-0.36255261301994324	1
4634	The arms of Le Scaff appear both in the tracery and on the tunic worn by Jean le Scaff.	Die Arme von Le Scaff erscheinen sowohl in der Tracery als auch in der Tunika von Jean le Scaff.	[100, 94, 73, 45, 30, 40]	63.6667	[0.2654514735602496, 0.3136118280255572, -0.7100200690414104, -1.093568436216858, -1.696215200786749, -1.0646619278981369]	-0.6642337220595579	-0.3045818507671356	1	? Was tun, wenn es kein richtiges deutsches Wort ist?
5971	Off Taiwan, recent sightings and entanglements occurred along east coasts such as at San Diego, Taiwan Strait, or at Hualien.	Vor Taiwan fanden vor kurzem Sichtungen und Verstrickungen an Ostk√ºsten wie San Diego, Taiwan Strait oder Hualien statt.	[64, 61, 66]	63.6667	[-2.3709880820974454, -1.2357281637897692, -1.3756225779151277]	-1.66078e+16	-0.374573677778244	1
6464	When Jason enters without knocking, she immediately shuts the notebook.	Als Jason klopft, schlie√üt sie sofort das Notizbuch.	[55, 72, 64]	63.6667	[-1.500914037028109, -0.8051061417376557, -2.3709880820974454]	-1.559e+16	-0.5088365077972412	1
6550	Hawkeye, a reformed underworld snoop who trails gangsters and other criminals.	Hawkeye, ein reformierter Unterwelt Snoop, der Gangster und andere Kriminelle verfolgt.	[64, 62, 65]	63.6667	[-3.1041256313457515, -2.549961409438979, -0.9432932546496776]	-2.19913e+16	-0.31724321842193604	1	? Ein wort nicht ü
6678	As with the other battleships of TF 38, skillful seamanship brought New Jersey through the storm largely unscathed.	Wie bei den anderen Schlachtschiffen der TF 38 brachte auch die geschickte Seemannschaft New Jersey weitgehend unversehrt durch den Sturm.	[64, 55, 72]	63.6667	[-3.1041256313457515, -3.6377008625316507, -0.719843458479854]	-2.48722e+16	-0.3404923677444458	1
6758	The first game at the arena pitted Gambit Esports and Fnatic on Train, Gambit's pick.	Das erste Spiel in der Arena hat Gambit Esports und Fnatic on Train, Gambit 's Pick.	[58, 76, 57]	63.6667	[-2.907908064122046, -0.4247618509526743, -1.749690450750551]	-1694120121941750	-0.3400314152240753	0
6879	Runoff elections also tend to attract lower turnouts.	Ablaufwahlen neigen auch dazu, niedrigere Wahlbeteiligung anzuziehen.	[64, 53, 74]	63.6667	[-3.1041256313457515, -1.6124381935037955, -0.6270457621312975]	-1.7812e+16	-0.5201871395111084	1
301	On the final lap, Richard Petty led Pearson down the backstretch.	In der letzten Runde f√ºhrte Richard Petty Pearson den R√ºcken hinunter.	[58, 70, 64]	64	[-2.543435998864467, -1.2608678885313718, -3.1041256313457515]	-230280983958053	-0.3505432903766632	1
950	The speedway runs from August to March and caters to cars, solos and sidecars.	Die Schnellstra√üe verl√§uft von August bis M√§rz und bietet Platz f√ºr Autos, Solos und Sidecars.	[100, 76, 93, 48, 47, 20]	64	[0.2654514735602496, -0.4247618509526743, 0.22412516435479046, -0.9727400250604212, -0.9892134047422928, -1.7857864547326259]	-0.6138208495954957	-0.34148356318473816	1
1324	Richter suggests that "Surrealism devoured and digested Dada."	Richter schl√§gt vor, dass "der Surrealismus Dada verschlang und verdaut".	[64, 72, 56]	64	[-2.3709880820974454, -0.8051061417376557, -1.470857220269045]	-1548983814701380	-0.2867870032787323	0
1428	Defeated, Cem fled to Rhodes, where the Knights Hospitaller kept him in custody.	Besiegt floh Cem nach Rhodos, wo ihn der Hospitaller der Ritter in Gewahrsam hielt.	[64, 68, 60]	64	[-2.3709880820974454, -1.1854504325226372, -1.2502945949515705]	-1.60224e+16	-0.23979228734970093	1
1587	When he hit the takeoff ramp, he claimed he felt the motorcycle unexpectedly decelerate.	Als er traf die Start-Rampe, behauptete er, er f√ºhlte sich das Motorrad unerwartet verlangsamt.	[64, 72, 56]	64	[-2.3709880820974454, -0.8051061417376557, -1.470857220269045]	-1548983814701380	-0.3841209411621094	0
1756	... A cricket chirps on the hearth, and we are reminded of Christmas gambols long ago.	... Eine Cricket zwitschert auf dem Herd, und wir werden an Weihnachtsgambole erinnert.	[100, 92, 84, 45, 33, 30]	64	[0.2654514735602496, -0.29625600614658404, 0.33592673061728845, -1.093568436216858, -1.5714501779553744, -1.4252241913153814]	-0.63085343457611	-0.46676361560821533	0
2427	By dawn on Wednesday 7 May, RAF armoured cars reconnoitred the top of the escarpment and reported it to be deserted.	In der D√§mmerung am Mittwoch, 7. Mai, RAF gepanzerte Autos wieder connoitred die Spitze der escarpment und berichtete, dass es verlassen werden.	[74, 54, 64]	64	[-0.614933996345165, -3.265854718805113, -0.9990553328875208]	-1626614682679260	-0.4996803402900696	0
2916	Cello Fury consists of three cellists and a drummer and Project Trio includes a flutist, bassist, and cellist.	Cello Fury besteht aus drei Cellisten und ein Schlagzeuger und Project Trio besteht aus Fl√∂tist, Bassist und Cellist.	[54, 80, 58]	64	[-3.265854718805113, -0.07484632883275455, -2.1363111594850905]	-1.82567e+16	-0.25125613808631897	0
3568	The Speedwell and the cutter turned around and sailed south.	Der Speedwell und der Cutter drehten sich um und segelten nach S√ºden.	[64, 70, 58]	64	[-3.1041256313457515, -1.8340681000728447, -1.3336278023145798]	-2.09061e+16	-0.2874319851398468	0	? nicht übersetzt, Sinn ok
3701	After firing fourteen shells, the fifteenth detonated in the right gun barrel in the center turret, destroying the gun.	Nach dem Abfeuern vierzehn Muscheln, z√ºndete die f√ºnfzehnte in der rechten Pistole Lauf in der Mitte Revolver, Zerst√∂rung der Waffe.	[100, 85, 93, 35, 49, 22]	64	[0.2654514735602496, 0.4310128033135338, 0.22412516435479046, -1.4963298067383144, -0.9060367228547097, -1.713674002049177]	-0.5325751817356045	-0.44788628816604614	0
4011	In Texas, the Houston Chronicle and the Austin American criticized the lynch mob, but spoke highly of Waco.	In Texas kritisierten Houston Chronicle und Austin American den Lynchmob, sprachen aber stark von Waco.	[56, 72, 64]	64	[-3.0868813914635793, -0.8051061417376557, -1.3517665399881071]	-1.74792e+16	-0.31076323986053467	1
4431	Army Spc Zachari Klawonn endured numerous instances of racism during his enlistment at Fort Hood, Texas.	Army Spc Zachari Klawonn ertrug w√§hrend seiner Einberufung in Fort Hood, Texas, zahlreiche rassistische F√§lle.	[74, 54, 64]	64	[-0.614933996345165, -1.5566761152659523, -1.0297319696340956]	-1.06711e+16	-0.38321560621261597	1	? Sinn kommt rüber, aber falsche Wortwahl
5047	In the east the YEO and AUS MTD DIVs located Turkish defences from Kustine, to Beit Jibrin.	Im Osten lagen die YEO und AUS MTD DIVs von Kustine bis Beit Jibrin.	[82, 100, 91, 31, 48, 32]	64	[0.14575458522479776, 0.2654514735602496, 0.04515183701325695, -1.6574343549468968, -0.9476250637985012, -1.3531117386319325]	-0.5836355435965044	-0.3238199055194855	0
5409	It emerges from molt as either an adult female or male.	Es entsteht aus Molt als erwachsenes Weibchen oder M√§nnchen.	[45, 75, 72]	64	[-2.535135504353276, -0.05103048675956321, -0.9439568253313346]	-1.17671e+16	-0.5361234545707703	0
5772	Converted and redesignated 11 December 1951 as Company A, 37th Tank Battalion, still Inactivated.	Am 11. Dezember 1951 umbenannt und umbenannt als Firma A, 37. Panzerbataillon, immer noch inaktiviert.	[64, 75, 53]	64	[-3.1041256313457515, -0.4685902305312789, -3.3553413824758795]	-2.30935e+16	-0.5011923909187317	0
6733	In the late 17th century, the three villages that predated Calcutta were ruled by the Nawab of Bengal under Mughal suzerainty.	Im sp√§ten 17. Jahrhundert wurden die drei D√∂rfer, die vordatiert Kalkutta von der Nawab von Bengalen unter Mogulsuzerainty regiert.	[75, 64, 53]	64	[-0.5198479236489196, -2.3709880820974454, -2.6108638357030336]	-1.8339e+16	-0.3129095435142517	0
6774	The Division Finals, the second playoff round, consisted of matchups between the winners of each division's semifinal rounds.	Das Division Finals, die zweite Playoff-Runde, bestand aus Matchups zwischen den Gewinnern der Halbfinalrunden jeder Division.	[64, 53, 75]	64	[-3.1041256313457515, -1.6124381935037955, -0.4685902305312789]	-1728384685126940	-0.33130940794944763	0
3859	The Jets get antsy while waiting for the Sharks inside Doc's Drugstore.	Die Jets werden antsy, w√§hrend sie auf die Haie in Doc 's Drugstore warten.	[100, 81, 91, 31, 42, 40]	64.1667	[0.2654514735602496, -0.8497147996944105, -0.37993944549444536, -1.6574343549468968, -1.1971551094612505, -1.0646619278981369]	-0.8139090273224818	-0.375232070684433	0
715	Ian as first mate, Padric as second, and McBride as third.	Ian als Erster, Padric als Zweiter und McBride als Dritter.	[65, 59, 70]	64.6667	[-3.0105262673205844, -1.2778657240767366, -1.2608678885313718]	-1.84975e+16	-0.21870191395282745	1
3759	The Tenth Doctor cringed at his fifth self's choice of wearing celery on his lapel.	Der zehnte Doktor kratzte vor der Wahl seines f√ºnften Selbst, Sellerie auf seinem Revers zu tragen.	[100, 90, 79, 50, 44, 25]	64.6667	[0.2654514735602496, -0.46362288484230674, -0.13950363286393827, -0.89218775095613, -1.1139784275736675, -1.6055053230240035]	-0.6582244242832994	-0.40134215354919434	0
4125	But the Disney villains turned Scott into a monkey much to his disappointment.	Aber die Disney B√∂sewichte verwandelten Scott in einen Affen zu seiner Entt√§uschung.	[65, 54, 75]	64.6667	[-3.0105262673205844, -3.4762267013653148, -0.3856724722712461]	-2.29081e+16	-0.3718663454055786	0
4979	Several thousand Cantonese men intermarried and cohabited with Malagasy women.	Mehrere tausend kantonesische M√§nner verflochten und lebten mit madagassischen Frauen zusammen.	[86, 100, 86, 51, 35, 30]	64.6667	[0.5260988760097791, 0.2654514735602496, -0.4022814813405768, -0.8519116139039844, -1.4882734960677912, -1.4252241913153814]	-0.5626900721762842	-0.3216743767261505	1	?
6074	In the confusion, the 2nd Iowa fell back into the first entrenchment and regrouped with their comrades behind them.	In der Verwirrung fiel das 2. Iowa in die erste Verankerung zur√ºck und gruppierte sich mit ihren Kameraden hinter ihnen.	[100, 100, 75, 28, 40, 45]	64.6667	[0.2654514735602496, 0.8505318100501577, -0.5198479236489196, -1.7782627661033337, -1.2803317913488337, -0.8843807961895145]	-0.5578066656133657	-0.3739274740219116	1
6110	Bartkowski retracted this statement later, following questioning by a Superintendent Gillard.	Bartkowski zog diese Aussage sp√§ter zur√ºck, nachdem er von einem Superintendent Gillard befragt worden war.	[63, 66, 65]	64.6667	[-2.460474745768212, -0.9302329440642391, -1.4707086506113731]	-1.62047e+16	-0.30985915660858154	0
6162	He finds a vessel, perhaps a skip or broken pram, full of rubbish and starts rummaging around inside it.	Er findet ein Gef√§√ü, vielleicht einen Skip oder gebrochenen Kinderwagen, voller M√ºll und f√§ngt an, sich darin zu tummeln.	[52, 73, 69]	64.6667	[-2.0149956336325174, -0.49690580123975703, -1.4193234201313905]	-1.31041e+16	-0.5542816519737244	0
3126	Meanwhile, a fugitive Robert greets Enrique during his birthday, with Rico and Santino abducted by Robert.	Inzwischen begr√º√üt ein Fl√ºchtling Robert Enrique w√§hrend seines Geburtstages, mit Rico und Santino von Robert entf√ºhrt.	[100, 79, 81, 48, 50, 31]	64.8333	[0.2654514735602496, -1.028688127035944, 0.05066851252855241, -0.9727400250604212, -0.8644483819109182, -1.3891679649736568]	-0.6564874188153564	-0.3005300760269165	0
3781	Eaton pinned Douglas after Jim Cornette hits Douglas with his tennis racket.	Eaton pinned Douglas, nachdem Jim Cornette Douglas mit seinem Tennisschl√§ger getroffen hatte.	[100, 79, 100, 31, 47, 32]	64.8333	[0.2654514735602496, -0.13950363286393827, 0.8505318100501577, -1.6574343549468968, -0.9892134047422928, -1.3531117386319325]	-0.5038799745957755	-0.40356582403182983	0
4741	They had some distinguished commanders, the Compton brothers, and during the Jacobite risings the Duke of Argyll.	Sie hatten einige bemerkenswerte Kommandeure, die Compton Br√ºder, und w√§hrend der Jakobiten steigt der Herzog von Argyll.	[77, 100, 90, 51, 42, 29]	64.8333	[-0.32967577825642896, 0.2654514735602496, -0.0443348266575098, -0.8519116139039844, -1.1971551094612505, -1.4612804176571057]	-0.603151045396005	-0.326894074678421	0
5080	The wrestler then tightens their grip to choke an opponent by compressing their throat.	Der Wrestler dr√ºckt dann den Griff, um einen Gegner zu ersticken, indem er seinen Hals komprimiert.	[79, 100, 90, 45, 45, 30]	64.8333	[-0.13950363286393827, 0.2654514735602496, -0.0443348266575098, -1.093568436216858, -1.072390086629876, -1.4252241913153814]	-0.5849282833538857	-0.47311004996299744	1
228	Steve Harmison bowled well for his 1 for 24 off 9 overs, though it was Mick Lewis who took the wickets, ending with 5 for 48.	Steve Harmison bog gut f√ºr seine 1 f√ºr 24 off 9 overs, obwohl es war Mick Lewis, der die Pforten nahm, endete mit 5 f√ºr 48.	[64, 79, 52]	65	[-1.899610089206723, 0.16523189586879544, -4.2273179996477515]	-1.98723e+16	-0.40865352749824524	0
630	A menu might include potato leek soup, carrot and bean salad, lamb with saffron, an assortment of cheeses, and grapefruit.	Eine Speisekarte k√∂nnte Kartoffellecksuppe, Karotte und Bohnensalat, Lamm mit Safran, eine Auswahl an K√§se und Grapefruit enthalten.	[65, 75, 55]	65	[-3.0105262673205844, -1.386634781719011, -1.500914037028109]	-1966025028689230	-0.33335790038108826	0
1497	A headline in the New York World newspaper shrieked "Tyranny!	Eine Schlagzeile in der New York World Zeitung schrie "Tyranny!	[65, 70, 60]	65	[-3.0105262673205844, -0.9952782871301464, -1.5791516318523608]	-1.86165e+16	-0.3455326557159424	0
1901	1973 models featured significantly enlarged "elephant foot" taillamps mounted in reshaped rear fenders.	1973 Modelle mit deutlich vergr√∂√üerten "Elefantenfu√ü" Heckleuchten montiert in umgeformten hinteren Kotfl√ºgel.	[61, 65, 69]	65	[-2.6394480731097456, -1.4707086506113731, -1.0675351751577902]	-1725897299626300	-0.4046507477760315	0
2074	It also similar to the one it precedes in DC Comics Batman and Catwoman.	Es √§hnelt auch dem, dem es in DC Comics Batman und Catwoman vorausgeht.	[65, 76, 54]	65	[-2.2815014184266786, -0.4247618509526743, -1.9202292696487413]	-1.54216e+16	-0.36387670040130615	0
2187	Amir Abdul Rahman Khan tried to persuade them to convert to Islam by deputing Kafir elders.	Amir Abdul Rahman Khan versuchte sie zu √ºberreden, sich zum Islam zu bekehren, indem er Kafir √Ñlteste absetzte.	[58, 72, 65]	65	[-1.3336278023145798, -0.8051061417376557, -2.2815014184266786]	-1.47341e+16	-0.4320831298828125	1
2225	The Cubs' offense again struggled to score as the game was tied at one in the eighth.	Die Cubs 'Straftat wieder k√§mpfte, um G√§ste, wie das Spiel an einem in der achten gebunden war.	[65, 61, 69]	65	[-3.0105262673205844, -2.6394480731097456, -1.36308849782527]	-2.33769e+16	-0.5436176061630249	0
3882	McCabe attacked the bowling vigorously, hooking relentlessly.	McCabe griff das Bowling energisch an und hakte unerbittlich.	[65, 75, 55]	65	[-3.0105262673205844, -1.386634781719011, -1.500914037028109]	-1966025028689230	-0.4109945595264435	0
4147	Wrecking and smuggling supplemented local incomes.	Aufruhr und Schmuggel erg√§nzten die Einkommen vor Ort.	[55, 75, 65]	65	[-1.9134416323281356, -0.5198479236489196, -2.2815014184266786]	-1571596991467910	-0.46941882371902466	1	?
4157	Alonso raced for Scuderia Ferrari for five seasons between 2010 and 2014.	Alonso fuhr f√ºr Scuderia Ferrari f√ºr f√ºnf Jahreszeiten zwischen 2010 und 2014.	[76, 73, 46]	65	[-0.4247618509526743, -1.5656081090605445, -2.3749994533772485]	-1.45512e+16	-0.3356894254684448	0
4447	In 2014, the Pacers and Heat renewed their rivalry in a second consecutive East Finals match up with the Heat eliminating the Pacers again.	Im Jahr 2014 erneuerten die Pacers und Heat ihre Rivalit√§t in einem zweiten aufeinanderfolgenden East Finals mit dem Heat Beseitigung der Pacers wieder.	[72, 65, 58]	65	[-0.8051061417376557, -0.9432932546496776, -1.3605759076103077]	-1036325101332540	-0.4048924744129181	0
5461	In South America, squirrel monkeys associate with capuchin monkeys.	In S√ºdamerika assoziieren sich Eichh√∂rnchen-Affen mit Kapuzineraffen.	[65, 74, 56]	65	[-2.2815014184266786, -0.614933996345165, -1.470857220269045]	-1.45576e+16	-0.24640993773937225	1
5552	Doom finds Iron Man again and teleports the two to the Jackpot Club in Chicago to confront Madam Masque.	Doom findet Iron Man wieder und teleportiert die beiden in den Jackpot Club in Chicago, um sich mit Mrs Masque zu konfrontieren.	[65, 75, 55]	65	[-3.0105262673205844, -0.5198479236489196, -1.7289176451250619]	-1.7531e+16	-0.2892935574054718	0	? Streng genommen grammar fehler
5597	Creeds and Confessions of Faith in the Christian Tradition.	Glaubensbekenntnisse in der christlichen Tradition.	[65, 70, 60]	65	[-3.0105262673205844, -1.2608678885313718, -2.7289347367805123]	-2333442964210820	-0.2734067142009735	1
5633	Other symptoms may include blurred vision, nasal stuffiness, diarrhea, frequent urination, pallor, or sweating.	Andere Symptome k√∂nnen verschwommenes Sehverm√∂gen, Nasenverstopfung, Durchfall, h√§ufiges Wasserlassen, Palor, oder Schwitzen.	[65, 71, 59]	65	[-3.0105262673205844, -1.1024123569313533, -2.818421400451279]	-2310453341567730	-0.2575051784515381	0
5646	Benson agrees, describing him as introverted and private as J. D. Salinger, although Hemingway masked his nature with braggadocio.	Benson stimmt zu, beschreibt ihn als introvertiert und privat wie J. D. Salinger, obwohl Hemingway maskierte seine Natur mit braggadocio.	[65, 73, 57]	65	[-3.0105262673205844, -0.49690580123975703, -2.9973947277928126]	-2.16828e+16	-0.25218215584754944	0
5811	Like the serpent and other animals, the cayman and the manatee also holds significance in Serer mythology.	Wie die Schlange und andere Tiere haben auch der Kajman und der Manatee eine Bedeutung in der Serer Mythologie.	[65, 61, 69]	65	[-3.0105262673205844, -2.6394480731097456, -0.720244941698305]	-2.12341e+16	-0.48977598547935486	0
5950	The Colts clinched the AFC's third seed with the win.	Die Colts holten den dritten Samen der AFC mit dem Sieg.	[65, 63, 67]	65	[-2.2815014184266786, -1.1135300758995572, -1.2805365052188824]	-1.55852e+16	-0.36705029010772705	1	?
6648	), Uhlig's Corrosion Handbook, 3rd ed., John Wiley & Sons, Hoboken, New Jersey, pp.	), Uhlig 's Corrosion Handbook, 3rd ed., John Wiley & Sons, Hoboken, New Jersey, pp.	[72, 58, 65]	65	[-0.9439568253313346, -3.1414929439738692, -3.0105262673205844]	-2.36533e+16	-0.1810091882944107	0
6963	Inhibition of the raphe shifts the behavioral phenotype of uncontrolled stress to a phenotype closer to that of controlled stress.	Die Hemmung der Vergewaltigung verschiebt den Verhaltens-Ph√§notyp unkontrollierten Stresses auf einen Ph√§notyp n√§her an den kontrollierten Stress.	[65, 76, 54]	65	[-3.0105262673205844, -0.4247618509526743, -1.9202292696487413]	-1.78517e+16	-0.413072794675827	0
6992	Those attacks exacted a toll from Beales neighbors.	Diese Angriffe forderten eine Maut von Beales Nachbarn.	[100, 91, 75, 50, 39, 35]	65	[0.2654514735602496, 0.04515183701325695, -0.5198479236489196, -0.89218775095613, -1.321920132292625, -1.244943059606759]	-0.6113825926551545	-0.3428165912628174	1
1149	In this treatment of the Superman mythos, the planet Krypton revolves around Antares.	In dieser Behandlung der Superman-Mythos dreht sich der Planet Krypton um Antares.	[100, 100, 80, 49, 22, 40]	65.1667	[0.2654514735602496, 0.37321150863630664, -0.04441756016769294, -0.9324638880082756, -2.0289219283370814, -1.0646619278981369]	-0.5719670537024384	-0.24009265005588531	0	? Nur nicht perfekt übersetzt, Sinn ist klar
1564	Faults along the border with the South Province have deposited metamorphic schists and quartzites, with some granite.	Fehler entlang der Grenze zur S√ºdprovinz haben metamorphe Schisten und Quarziten mit etwas Granit hinterlegt.	[100, 90, 100, 35, 46, 20]	65.1667	[0.2654514735602496, 0.9064431667947606, 0.8505318100501577, -1.4963298067383144, -1.0308017456860843, -1.7857864547326259]	-0.38174859279197615	-0.4188495874404907	1
3927	Apart from elk, many other ungulates reside in the park, including bighorn sheep, moose, and mule deer.	Neben dem Elch befinden sich viele andere Hufe im Park, darunter Schaf, Elch und Maultier.	[100, 86, 88, 40, 42, 35]	65.1667	[0.2654514735602496, -0.798356642233752, 0.7162710214022698, -1.2949491214775863, -1.1971551094612505, -1.244943059606759]	-0.5922802396361381	-0.6349775195121765	0
2181	But yet he doth what lieth in him the perilous rock to shun.	Er tut aber, was in ihm liegt, den gef√§hrlichen Felsen, zu meiden.	[82, 60, 54]	65.3333	[0.14575458522479776, -1.2221036458388934, -1.5811385329277825]	-0.8858291978472929	-0.49446985125541687	0
1805	Babylonian Talmud Sukkah 52a records of a dispute between Rabbi Dosa ben Harkinas and other unnamed rabbis.	Babylonian Talmud Sukkah 52a Aufzeichnungen eines Streits zwischen Rabbi Dosa ben Harkinas und anderen ungenannten Rabbinern.	[100, 100, 88, 39, 46, 20]	65.5	[0.2654514735602496, 0.37321150863630664, 0.7162710214022698, -1.335225258529732, -1.0308017456860843, -1.7857864547326259]	-0.46614657589160263	-0.18000374734401703	0
4244	Before dawn on 5 May, she launched 18 Swordfish in three flights together with 8 Martlets.	Vor der Morgend√§mmerung am 5. Mai startete sie zusammen mit 8 Martlets auf drei Fl√ºgen 18 Schwertfische.	[100, 80, 100, 35, 48, 30]	65.5	[0.2654514735602496, -0.9392014633651773, 0.37321150863630664, -1.4963298067383144, -0.9476250637985012, -1.4252241913153814]	-0.694952923836803	-0.3556388020515442	0
5454	Summer Strallen replaced Fisher in February 2008, with Mulholland portraying Maria on Monday evenings and Wednesday matinees.	Sommer Strallen ersetzt Fisher im Februar 2008, mit Mulholland Darstellung Maria am Montagabend und Mittwoch Matinees.	[100, 100, 82, 50, 36, 25]	65.5	[0.2654514735602496, 0.37321150863630664, 0.14575458522479776, -0.89218775095613, -1.4466851551239999, -1.6055053230240035]	-0.5266601102804632	-0.28695613145828247	0
163	1 Guard to cede his command to the Subaltern of No.1 Guard.	1 Wache, um seinen Befehl an die Subaltern von Nr.1 Wache abzulegen.	[66, 72, 59]	65.6667	[-2.9169269032954177, -0.8051061417376557, -1.6359979048184243]	-1.78601e+16	-0.5544570684432983	0
358	He also offered to reorganize the now scattered privateers.	Er bot auch an, die nun verstreuten Privatleute neu zu organisieren.	[56, 75, 66]	65.6667	[-2.758044635417048, -0.4685902305312789, -2.9169269032954177]	-2.04785e+16	-0.447849303483963	1	? Oder ist das nur mildly falsch?
1174	Lin and former Knicks teammate Landry Fields appeared on the channel revealing their "secret handshake".	Lin und ehemaliger Knicks Teamkollege Landry Fields erschienen auf dem Kanal und enth√ºllten ihren "geheimen Handshake".	[66, 69, 62]	65.6667	[-2.9169269032954177, -1.3886564302001447, -2.549961409438979]	-2.28518e+16	-0.30947813391685486	0
1967	Once the column closed, the skirmishers would move off to its flanks, then the column would fire a massed musket salvo and charge with their bayonets.	Sobald die S√§ule geschlossen war, gingen die Scharm√ºtzer an ihre Flanken, dann feuerte die S√§ule einen massenhaften Muskettsalvo an und lud mit ihren Bajonetten auf.	[100, 86, 88, 35, 50, 35]	65.6667	[0.2654514735602496, 0.5260988760097791, -0.2233081539990433, -1.4963298067383144, -0.8644483819109182, -1.244943059606759]	-0.5062465087808343	-0.5016711950302124	0
2326	Some trains run from Vilnius to ≈†e≈°tokai, and, Poland, through Kaunas.	Einige Z√ºge fahren von Vilnius nach ≈†e≈°tokai und, Polen, durch Kaunas.	[66, 73, 58]	65.6667	[-2.9169269032954177, -0.7100200690414104, -1.6928441777844876]	-1.77326e+16	-0.25026074051856995	0
2402	Gabool attempts to engage Rawnblade, but quickly retreats further into his lair after thrusting a sharp dagger into the badger's chest.	Gabool versucht RawnBlade einzugreifen, zieht sich aber schnell weiter in seine H√∂hle zur√ºck, nachdem er einen scharfen Dolch in die Brust des Dachses gesto√üen hat.	[69, 66, 62]	65.6667	[-1.4193234201313905, -2.4720254291909787, -1.271938675460006]	-1721095841594120	-0.4647429585456848	0
3213	In South America his railways totalled 250 mi, in Australia 132 mi, and in India and Nepal 506 mi.	In S√ºdamerika betrug seine Eisenbahn 250 Meilen, in Australien 132 Meilen und in Indien und Nepal 506 Meilen.	[66, 76, 55]	65.6667	[-2.9169269032954177, -1.2971481180482443, -1.5259978765984137]	-1.91336e+16	-0.29019200801849365	0
3871	The furious Northumberland vowed never to support the Tories again.	Das w√ºtende Northumberland gelobte, die Tories nie wieder zu unterst√ºtzen.	[73, 58, 66]	65.6667	[-0.7100200690414104, -2.907908064122046, -1.2380739940559804]	-1.61867e+16	-0.2798363268375397	0
3998	The Argonauts pour libations to the ghost of Sthenelus and the three survivors gain places aboard the Argo.	Die Argonauten gie√üen Trankopfer zum Geist von Sthenelus und die drei √úberlebenden gewinnen Pl√§tze an Bord des Argo.	[66, 74, 57]	65.6667	[-2.9169269032954177, -0.6270457621312975, -1.924527061156491]	-1.82283e+16	-0.2835693061351776	0
4119	However, they fell out of the playoff picture after that streak ended, struggling in the standings and letting other teams get ahead of them.	Allerdings fielen sie aus dem Playoff-Bild, nachdem dieser Streifen beendet, k√§mpfen in der Gesamtwertung und lassen andere Teams vor ihnen.	[100, 100, 100, 35, 34, 25]	65.6667	[0.2654514735602496, 0.8505318100501577, 0.37321150863630664, -1.4963298067383144, -1.5298618370115828, -1.6055053230240035]	-0.5237503624211978	-0.390542596578598	0
4162	Late on September 29, the JMA upgraded Nalgae to a typhoon.	Ende September hat die JMA Nalgen zu einem Taifun aufger√ºstet.	[100, 94, 79, 50, 36, 35]	65.6667	[0.2654514735602496, 0.3136118280255572, -0.13950363286393827, -0.89218775095613, -1.4466851551239999, -1.244943059606759]	-0.5240427161608366	-0.5297983288764954	0
5126	2 ranked and teammate Michael Kim bypassing the 200 metres) conceded defeat.	2 rangiert und Teamkollege Michael Kim unter Umgehung der 200 Meter) gab Niederlage.	[66, 71, 60]	65.6667	[-2.9169269032954177, -1.1024123569313533, -2.7289347367805123]	-2.24942e+16	-0.32247623801231384	0
5319	Late on October 16, Forrest intensified into a typhoon.	Am sp√§ten 16. Oktober intensivierte sich Forrest zu einem Taifun.	[58, 73, 66]	65.6667	[-2.907908064122046, -0.7100200690414104, -0.9194506569753583]	-1.51246e+16	-0.40728405117988586	0
5891	;Recitation Audio on The Chhandogya Upanishad, Swami Krishnananda, Divine Life Society	; Rezitation Audio on The Chhandogya Upanishad, Swami Krishnananda, Divine Life Society	[66, 72, 59]	65.6667	[-2.192014754755912, -0.5636386803936028, -2.0412250867888453]	-1598959507312780	-0.15113262832164764	0
6066	The French and the Portuguese would pronounce as Zho the Jo and it becomes Zhombe clinic.	Die Franzosen und Portugiesen w√ºrden als Zho die Jo aussprechen und es wird Zhombe Klinik.	[70, 66, 61]	65.6667	[-0.9952782871301464, -2.192014754755912, -1.9024041152942153]	-1.69657e+16	-0.3837805688381195	0
6588	Hitler's annexation of Austria in March 1938 made Halifax keener on rearmament.	Hitlers Annexion von √ñsterreich im M√§rz 1938 machte Halifax Keener auf Aufr√ºstung.	[51, 78, 68]	65.6667	[-2.0893013294497687, 0.6177824849607275, -1.577778951731409]	-101643259874015	-0.3783809542655945	0
6916	Leviathan chased Monarca, but on 24 October she came across Rayo, dismasted but still flying Spanish colours, at anchor off the shoals of Sanl√∫car.	Leviathan verfolgt Monarca, aber am 24. Oktober traf sie Rayo, best√ºrzt, aber immer noch fliegend spanischen Farben, vor Anker vor den Schw√§rmen von Sanl√∫car.	[100, 93, 81, 51, 44, 25]	65.6667	[0.2654514735602496, 0.22412516435479046, 0.05066851252855241, -0.8519116139039844, -1.1139784275736675, -1.6055053230240035]	-0.5051917023430105	-0.37301212549209595	0
6930	However, the Colombian Rainbow boa, Epicrates maurus can also reproduce by facultative parthenogenesis resulting in production of WW female progeny.	Allerdings kann die kolumbianische Rainbow Boa, Epicrates maurus auch durch fakultative Parthenogenese zu reproduzieren, was zur Produktion von WW weiblichen Nachkommen.	[66, 72, 59]	65.6667	[-2.9169269032954177, -0.9439568253313346, -2.818421400451279]	-2.22644e+16	-0.32194381952285767	0
318	Those under 18 and over 35 could substitute for conscripts, in September those from 35 to 45 became conscripts.	Diejenigen unter 18 und √ºber 35 konnten Wehrpflichtige ersetzen, im September wurden diese von 35 bis 45 Wehrpflichtigen.	[100, 100, 90, 48, 32, 25]	65.8333	[0.2654514735602496, 0.8505318100501577, 0.9064431667947606, -0.9727400250604212, -1.613038518899166, -1.6055053230240035]	-0.3614762360964039	-0.4079493582248688	0
1779	The blockade proved only partially successful due to crucial oversights by the planners in Paris.	Die Blockade erwies sich nur teilweise als erfolgreich, da die Planer in Paris entscheidende √úbersichten hatten.	[100, 99, 76, 50, 41, 29]	65.8333	[0.2654514735602496, 0.7610451463793909, -0.4247618509526743, -0.89218775095613, -1.238743450405042, -1.4612804176571057]	-0.4984128083385519	-0.6257120966911316	1
2580	Stuart repulsed Gregg's charge, counterattacked, then fell back to defensive positions 1/2 mi to the west.	Stuart wies Gregg 's Anklage zur√ºck, konterkarierte, fiel dann in Verteidigungspositionen 1 / 2 mi nach Westen zur√ºck.	[100, 77, 85, 40, 58, 35]	65.8333	[0.2654514735602496, -0.32967577825642896, -0.4917681450113435, -1.2949491214775863, -0.5317416543605858, -1.244943059606759]	-0.6046043808587424	-0.49815481901168823	1
10	Sienna Miller portrays The Baroness as one of the primary antagonists of Stephen Sommers' 2009 film G.I.	Sienna Miller portr√§tiert The Baroness als einen der Hauptantagonisten des Films G.I. von Stephen Sommers 2009	[73, 59, 66]	66	[-0.5334660626697776, -0.5115584708037272, -2.192014754755912]	-1.07901e+16	-0.296893835067749	0
231	The blades roll out when they are deploying after the ejection from the spacecraft.	Die Klingen rollen aus, wenn sie nach dem Auswurf aus dem Raumschiff eingesetzt werden.	[66, 62, 70]	66	[-2.9169269032954177, -1.110579489363207, -1.2608678885313718]	-1.76279e+16	-0.3929871618747711	1
327	The whales were spotted from shore, then chased and lanced repeatedly from the bow of a shallop.	Die Wale wurden vom Ufer gefleckt, dann gejagt und immer wieder aus dem Schleife einer Schallop lanciert.	[57, 75, 66]	66	[-2.650740317140757, -0.4685902305312789, -2.9169269032954177]	-2.01209e+16	-0.6532833576202393	0
874	On 31 October 2016, Pope Francis commemorated the 499th anniversary of the Reformation with Lutherans in Sweden.	Am 31. Oktober 2016 gedachte Papst Franziskus gemeinsam mit den Lutheranern in Schweden des 499. Jahrestages der Reformation.	[66, 71, 61]	66	[-2.9169269032954177, -0.9427811157199508, -2.6394480731097456]	-2166385364041700	-0.2810436487197876	0	ist doch gut?
991	Difficulties with the diffusers and pumps paled into insignificance besides those with the porous barrier.	Die Schwierigkeiten mit den Diffusoren und Pumpen verblassen neben denen mit der por√∂sen Barriere in Bedeutungslosigkeit.	[78, 70, 50]	66	[0.006776364268776851, -1.2277419668850482, -3.6238013734881798]	-1.61492e+16	-0.4639720916748047	0
1312	Daily Telegraph, 26 September 1931 Ourselves in Duplicate.	Daily Telegraph, 26. September 1931 Wir selbst in Duplikat.	[66, 73, 59]	66	[-2.192014754755912, -0.7100200690414104, -1.305435251280939]	-1.40249e+16	-0.3668420910835266	0
1509	effectively foreshadowed the lush orchestration and maturity of Pet Sounds.	die √ºppige Orchestrierung und Reife von Pet Sounds.	[66, 71, 61]	66	[-2.9169269032954177, -0.9001922144339011, -2.686967672931539]	-2.16803e+16	-0.48293331265449524	0	?
3901	From the outset, the Israeli Air Force flew paratroop drops, supply flights and medevac sorties.	Von Anfang an flog die israelische Luftwaffe Fallschirmj√§ger, lieferte Fl√ºge und f√ºrchterliche Leiden.	[100, 100, 100, 45, 31, 20]	66	[0.2654514735602496, 0.8505318100501577, 0.37321150863630664, -1.093568436216858, -1.6546268598429574, -1.7857864547326259]	-0.5074644930909545	-0.48121222853660583	1
4761	Violence petered out in the 1880s and practically ceased after 1890.	Die Gewalt versteinerte in den 1880er Jahren und h√∂rte nach 1890 praktisch auf.	[66, 56, 76]	66	[-2.9169269032954177, -1.445151958790266, -0.31013469893126033]	-1557404520338980	-0.43142619729042053	1
5160	As he tried to defend Harden from advancing to the rim, George's leg caught on the stanchion of the hoop, and fractured.	Als er versuchte, Harden vom Vorr√ºcken bis zum Rand zu verteidigen, fing George 's Bein auf der Rankenstange des Bogens und zerbrach.	[76, 66, 56]	66	[-0.4247618509526743, -2.192014754755912, -2.3451914405497267]	-1653989348752770	-0.5679386258125305	0
5209	Porter captured the Post Office packet Nocton on 12 December 1812 laden with ¬£15,000 of specie.	Porter eroberte das Postamt-Paket Nocton am 12. Dezember 1812 beladen mit ¬£15.000 von specie.	[72, 66, 60]	66	[-0.8051061417376557, -2.192014754755912, -1.2502945949515705]	-1415805163815040	-0.3888556659221649	0
5247	Outmanned, they retreated to a nearby hill where British musket fire could not reach them.	Ausgemannt zogen sie sich auf einen nahegelegenen H√ºgel zur√ºck, wo sie von britischem Muskettfeuer nicht erreicht werden konnten.	[70, 66, 62]	66	[-0.9952782871301464, -2.192014754755912, -2.5285121413315204]	-1.90527e+16	-0.48425203561782837	1	? Oder ist das nahe genug am echten Sinn?
6062	He usually bowled over the wicket, meaning he bowled from the right hand side of the wickets and therefore angled the ball across the pitch.	Normalerweise beugte er sich √ºber das Korb, was bedeutet, dass er sich von der rechten Seite der Korbe bog und daher den Ball √ºber das Spielfeld schwenkte.	[49, 75, 74]	66	[-4.588434052131762, -0.5198479236489196, -0.27396814399966013]	-1794083373260110	-0.6121506690979004	0
6241	pushing, pinching, slapping, scratching or kicking), while males are more likely to punch, strangle, beat, burn, or threaten with weapons.	Sie dr√ºcken, kneifen, schlagen, kratzen oder treten), w√§hrend M√§nner eher mit Waffen schlagen, w√ºrgen, schlagen, verbrennen oder bedrohen.	[66, 74, 58]	66	[-2.9169269032954177, -1.4761214453897777, -1.5708601210516016]	-1.98797e+16	-0.48495662212371826
6428	The 1896 Republican National Convention convened at the Wigwam, a temporary structure in St. Louis, on June 16.	Die republikanische Nationalversammlung von 1896 kam am 16. Juni im Wigwam, einer vor√ºbergehenden Struktur in St. Louis, zusammen.	[71, 61, 66]	66	[-1.1024123569313533, -2.2215230440355946, -2.9169269032954177]	-2.08029e+16	-0.4079495072364807
3858	From September 1961 to February 1962, The Sullivans underwent a major overhaul in the Boston Naval Shipyard.	Von September 1961 bis Februar 1962 wurden die Sullivans in der Boston Naval Shipyard einer General√ºberholung unterzogen.	[100, 77, 95, 31, 45, 50]	66.3333	[0.2654514735602496, -0.32967577825642896, 0.40309849169632395, -1.6574343549468968, -1.072390086629876, -0.7040996644808922]	-0.5158416531762534	-0.30875691771507263
4368	Some SCLC members grew frustrated with his indecisiveness.	Einige Mitglieder der SCLC wurden frustriert √ºber seine Unentschlossenheit.	[79, 52, 68]	66.3333	[-0.13950363286393827, -3.4448280461466463, -0.7760070199361482]	-1453446232982240	-0.33561351895332336
5338	Troops in Chengdu used concussion grenades, truncheons, knives and electroshock weapon against civilians.	Truppen in Chengdu benutzten Schlaggranaten, Truncheons, Messer und Elektroschockwaffen gegen Zivilisten.	[52, 77, 70]	66.3333	[-2.0149956336325174, 0.3948448277206306, -1.2608678885313718]	-0.9603395648144195	-0.39453813433647156
6849	The gang pull a gun from the policeman's pocket and shoos Karthik.	Die Bande zieht eine Waffe aus der Tasche des Polizisten und Shoos Karthik.	[51, 75, 73]	66.3333	[-2.0893013294497687, -0.05103048675956321, -0.785501293731316]	-0.9752777033135493	-0.3303069472312927
75	McKinley soothed ruffled feathers of party bigwigs by mail and in person.	McKinley beruhigte geschwollene Federn von Partybigwigs per Post und pers√∂nlich.	[89, 100, 89, 35, 46, 40]	66.5	[0.8113570940985152, 0.2654514735602496, -0.13382149032827656, -1.4963298067383144, -1.0308017456860843, -1.0646619278981369]	-0.4414677338320079	-0.4722192585468292
2927	Most colleges and universities in the Philippines follows the traditional mortarboard, hood and gown during graduation.	Die meisten Hochschulen und Universit√§ten auf den Philippinen folgen der traditionellen Mortarboard, Kapuze und Kleid w√§hrend der Graduierung.	[100, 72, 100, 45, 50, 32]	66.5	[0.2654514735602496, -0.8051061417376557, 0.8505318100501577, -1.093568436216858, -0.8644483819109182, -1.3531117386319325]	-0.5000419024811595	-0.37461864948272705
4118	The remnants of the German Sixth Army surrendered on 2 February 1943.	Die √úberreste der Sechsten deutschen Armee fielen am 2. Februar 1943 aus.	[100, 80, 100, 45, 44, 30]	66.5	[0.2654514735602496, -0.9392014633651773, 0.37321150863630664, -1.093568436216858, -1.1139784275736675, -1.4252241913153814]	-0.6555515893790881	-0.5359028577804565
157	In 7 AD Augustus sent Germanicus to Illyricum with a force of freemen and freedmen.	In 7 ANZEIGE schickte Augustus Germanicus zu Illyricum mit einer Kraft der Freier und Freier.	[63, 70, 67]	66.6667	[-2.0069144074830136, -1.2608678885313718, -2.823327539270251]	-2.03037e+16	-0.3979439437389374
181	Able to erupt into a massive supernova capable of engulfing entire cities.	Kann in eine massive Supernova ausbrechen, die ganze St√§dte verschlingen kann.	[67, 72, 61]	66.6667	[-2.823327539270251, -0.719843458479854, -2.6394480731097456]	-206087302361995	-0.41047993302345276
757	Dissertation), University of Missouri‚ÄîColumbia, 2011, online, with detailed bibliography pp.	Dissertation), University of Missouri ForschungsColumbia, 2011, online, mit ausf√ºhrlicher Bibliographie pp.	[67, 71, 62]	66.6667	[-2.102528091085145, -0.6247377243387089, -1.755966868700109]	-1.49441e+16	-0.3496518135070801
820	1710 passed with the Scots Greys once again patrolling the frontier with the France.	1710 ging es mit den Schotten Greys wieder patrouillieren die Grenze zu Frankreich.	[100, 80, 94, 43, 43, 40]	66.6667	[0.2654514735602496, -0.04441756016769294, 0.3136118280255572, -1.1741207103211493, -1.1555667685174589, -1.0646619278981369]	-0.4766172775531052	-0.5166265368461609
1325	In cattle, the symptoms may include drooling, restlessness, uncoordination, urine retention, dysphagia, and sternal recumbency.	Bei Rindern k√∂nnen die Symptome Ertrinken, Ruhelosigkeit, Unkoordinierung, Harnspeicherung, Dysphagie und Brustkrebs sein.	[73, 60, 67]	66.6667	[-0.785501293731316, -2.3288273623118854, -2.823327539270251]	-1979218731771150	-0.4094236195087433
1466	The General meets more regularly with smaller councils composed of just the provincials.	Der General trifft sich regelm√§√üig mit kleineren R√§ten, die sich nur aus den Provinzialen zusammensetzen.	[67, 74, 59]	66.6667	[-2.102528091085145, -0.614933996345165, -1.305435251280939]	-1.34097e+16	-0.3945363461971283
1879	Kant further elaborates on the distinction between "analytic" and "synthetic" judgments.	Kant erl√§utert weiter die Unterscheidung zwischen "analytischen" und "synthetischen" Urteilen.	[67, 62, 71]	66.6667	[-2.102528091085145, -0.5038338484022691, -0.9538426292256633]	-1.18673e+16	-0.3180595338344574
2251	Charles Albert, growing impatient, pushed forward with three squadrons of mounted carabinieri, between the "Cuneo" brigade and the "Piemonte" brigade.	Charles Albert, ungeduldig, mit drei Schwadronen montierten Carabinieri zwischen der Brigade "Cuneo" und der Brigade "Piemonte" vorw√§rts geschoben.	[67, 70, 63]	66.6667	[-2.823327539270251, -1.2608678885313718, -2.460474745768212]	-2.18156e+16	-0.34249642491340637
2387	Remnants of a World War 2 concrete searchlight mount adjoin the Trig Station.	An der Trig Station befinden sich Reste eines 2. Weltkrieges.	[67, 75, 58]	66.6667	[-2.102528091085145, -0.5198479236489196, -1.3605759076103077]	-1.32765e+16	-0.5698565244674683
3189	Arkansas State Police Detective Max Andrew Tackett	Arkansas State Police Detective Max Andrew Tackett	[53, 81, 66]	66.6667	[-3.3553413824758795, 0.05066851252855241, -1.4596167900387038]	-1588096553328670	-0.13020916283130646
4059	Other ants and predatory invertebrates prey on the jack jumper.	Andere Ameisen und Raubtiere wirbellosen Beute auf den Jack Jumper.	[90, 94, 75, 60, 36, 45]	66.6667	[-0.6705421666914173, 0.3136118280255572, -0.5198479236489196, -0.48942638043467374, -1.4466851551239999, -0.8843807961895145]	-0.6162117656771613	-0.29401394724845886
4352	The Ups and Downs of Theophilus Maitland by Vinette Carroll and Miki Grant.	The Ups and Downs of Theophilus Maitland von Vinette Carroll und Miki Grant.	[100, 100, 100, 31, 29, 40]	66.6667	[0.2654514735602496, 0.8505318100501577, 0.37321150863630664, -1.6574343549468968, -1.7378035417305406, -1.0646619278981369]	-0.49511750538814336	-0.11687552183866501
4615	Some fittings for wooden interiors include very delicately patterned polychrome falcons in faience.	Einige Beschl√§ge f√ºr Holzinnenr√§ume sind sehr fein gemusterte polychrome Falken in Faience.	[56, 77, 67]	66.6667	[-1.445151958790266, -0.32967577825642896, -2.102528091085145]	-1.29245e+16	-0.5172804594039917
4850	He opposed the bombing of Germany, lest the Germans retaliate.	Er widersetzte sich der Bombardierung Deutschlands, damit die Deutschen nicht revanchieren.	[74, 67, 59]	66.6667	[-0.614933996345165, -2.102528091085145, -1.305435251280939]	-1.34097e+16	-0.4608098566532135
4968	Administratively, the Tenth Flotilla operated under the First Submarine Flotilla at Alexandria, itself under Cunningham.	Administrativ betrieben die Zehnte Flottille unter der Ersten U-Boot-Flottille in Alexandria, selbst unter Cunningham.	[81, 100, 92, 50, 42, 35]	66.6667	[0.05066851252855241, 0.2654514735602496, 0.1346385006840237, -0.89218775095613, -1.1971551094612505, -1.244943059606759]	-0.48058790554188563	-0.3625049293041229
5382	Locos feuded mostly with El Hijo del Santo and his partner Octag√≥n, eventually ending in a Hair vs.	Loks feuchten vor allem mit El Hijo del Santo und seinem Partner Octag√≥n, schlie√ülich endet in einem Haar vs	[70, 63, 67]	66.6667	[-1.2608678885313718, -2.0069144074830136, -2.823327539270251]	-2.03037e+16	-0.34454861283302307
5547	Dreadnoughts frequently carried torpedo tubes themselves.	Dreadnoughts trugen h√§ufig Torpedor√∂hren selbst.	[100, 82, 92, 51, 40, 35]	66.6667	[0.2654514735602496, 0.14575458522479776, 0.1346385006840237, -0.8519116139039844, -1.2803317913488337, -1.244943059606759]	-0.4718903175650843	-0.433598130941391
5750	The Commando Brigade, consisting of No.s 3, 4 and 6 Army Commandos and No.	Die Kommandobrigade, bestehend aus den Kommandos Nr. 3, 4 und 6 der Armee und Nr. 1.	[67, 66, 67]	66.6667	[-2.823327539270251, -2.192014754755912, -0.8317690981739914]	-1.94904e+16	-0.42185157537460327
5847	In the Hyndlulj√≥√∞, Freyja transformed her prot√©g√© √ìttar into a boar to conceal him.	Im Hyndlulj√≥√∞ verwandelte Freyja ihren Sch√ºtzling √ìttar in ein Schwein, um ihn zu verbergen.	[67, 72, 61]	66.6667	[-2.823327539270251, -0.9439568253313346, -2.8904426259302856]	-2.21924e+16	-0.27351438999176025
5884	January 6 Sam Peter defeats James Toney by unanimous decision in their rematch.	6. Januar Sam Peter besiegt James Toney durch einstimmigen Beschluss in ihrem Rematch.	[78, 58, 64]	66.6667	[-0.23458970556018363, -1.3336278023145798, -1.0297319696340956]	-0.8659831591696197	-0.2188238799571991
6209	Equites cataphractarii, or simply cataphractarii for short, were the heavily armoured cavalry of the Roman army.	Equites cataphractarii, kurz Cataphractarii, waren die stark gepanzerte Kavallerie der r√∂mischen Armee.	[67, 63, 70]	66.6667	[-2.102528091085145, -1.1135300758995572, -0.9952782871301464]	-1403778818038280	-0.2252112776041031
2737	Warner Bros. optioned the screenplay and greenlit the film in 1973.	Warner Bros. entschied sich f√ºr das Drehbuch und beleuchtete den Film 1973.	[100, 92, 74, 50, 45, 40]	66.8333	[0.2654514735602496, 0.1346385006840237, -0.614933996345165, -0.89218775095613, -1.072390086629876, -1.0646619278981369]	-0.5406806312641724	-0.4283822774887085
4750	He finished his sophomore season 244 of 380 for 2,954 passing yards, 22 touchdowns, and four interceptions.	Er beendete seine Sophomore Saison 244 von 380 f√ºr 2.954 vorbei Werften, 22 Touchdowns, und vier Abfangen.	[84, 100, 94, 50, 48, 25]	66.8333	[0.33592673061728845, 0.2654514735602496, 0.3136118280255572, -0.89218775095613, -0.9476250637985012, -1.6055053230240035]	-0.42172135092925656	-0.28935104608535767
4793	On 26 December 1922, Germany defaulted on timber deliveries.	Am 26. Dezember 1922 versagte Deutschland bei Holzlieferungen.	[85, 100, 91, 51, 44, 30]	66.8333	[0.4310128033135338, 0.2654514735602496, 0.04515183701325695, -0.8519116139039844, -1.1139784275736675, -1.4252241913153814]	-0.4415830198176655	-0.4187292456626892
3	Heavy arquebuses mounted on wagons were called arquebus √† croc.	Schwere Arquebuses auf Waggons montiert wurden Arquebus √† croc genannt.	[61, 55, 85]	67	[-1.1951539386222017, -0.7129165922903007, -0.4917681450113435]	-0.7999462253079486	-0.43269601464271545
293	She fired two spreads of torpedoes which sank Holland Maru with her guns still firing.	Sie feuerte zwei Spreads Torpedos, die Holland Maru mit ihren noch feuernden Waffen versanken.	[67, 74, 60]	67	[-2.823327539270251, -0.27396814399966013, -2.7289347367805123]	-1.94208e+16	-0.5272212028503418
387	British Cycling then enlisted the newly retired Chris Boardman as his mentor.	British Cycling ernannte dann den neu pensionierten Chris Boardman zu seinem Mentor.	[67, 72, 62]	67	[-2.823327539270251, -0.9439568253313346, -1.5161742966400555]	-1.76115e+16	-0.4300936758518219
797	Connelly, Joan Breton, The Parthenon Enigma, Knopf Doubleday Publishing Group, 2014. .	Connelly, Joan Breton, The Parthenon Enigma, Knopf Doubleday Publishing Group, 2014.	[80, 67, 54]	67	[-0.04441756016769294, -0.8317690981739914, -1.5811385329277825]	-0.8191083970898223	-0.06019259989261627
2232	During the 1930s, many Gestalt psychologists, most notably Kurt Lewin, fled to the United States from Nazi Germany.	In den 1930er Jahren flohen viele Gestaltpsychologen, vor allem Kurt Lewin, aus Nazi-Deutschland in die Vereinigten Staaten.	[67, 67, 67]	67	[-0.9004101963737501, -1.2805365052188824, -2.823327539270251]	-1.66809e+16	-0.22016896307468414
2649	Strap hinges usually mount centered on the battens.	Gurtscharniere montieren in der Regel zentriert auf den Mast.	[67, 64, 70]	67	[-2.823327539270251, -2.2116010781314834, -1.1657187729600478]	-2.06688e+16	-0.5282000303268433
3255	After Vietnamese reunification, Vietnam enumerated its population by ethnicity from 1979 up to the most recent census in 2009.	Nach der Wiedervereinigung Vietnams z√§hlte Vietnam seine Bev√∂lkerung von 1979 bis zur j√ºngsten Volksz√§hlung 2009 nach Ethnizit√§t auf.	[85, 58, 58]	67	[0.4310128033135338, -1.3336278023145798, -1.3605759076103077]	-0.7543969688704513	-0.38063541054725647
3597	Up ahead of the ground troops, the Air Force in the late afternoon bombed, napalmed, rocketed, and strafed Koch'ang, leaving it virtually destroyed.	Aufw√§rts vor den Bodentruppen bombardierte die Luftwaffe am sp√§ten Nachmittag, napalmierte, rockte und streckte Koch 'ang, so dass er praktisch zerst√∂rt wurde.	[71, 74, 56]	67	[-1.744581436402078, -0.614933996345165, -1.470857220269045]	-1.27679e+16	-0.4923643469810486
4370	The concomitant use of a cytochrome P450 inducer or inhibitor with feminizing hormone therapy may necessitate medication dosage adjustments.	Die gleichzeitige Verwendung eines Cytochrom-P450-Induktors oder -Inhibitors mit feminisierender Hormontherapie kann Medikamentendosis-Anpassungen erfordern.	[70, 67, 64]	67	[-1.2608678885313718, -2.3883419898431173, -1.1233272838255035]	-1.59085e+16	-0.4162980616092682
4992	Small laterals originate along the taproot, but many die back during the fall.	Kleine Laterale entstehen entlang der Bandwurzel, aber viele sterben im Herbst zur√ºck.	[54, 76, 71]	67	[-1.8663842419980152, 0.1719071704805337, -1.1024123569313533]	-0.9322964761496116	-0.5059554576873779
5381	Those colonists who could not afford their passage indentured themselves to the HBC.	Diese Kolonisten, die sich ihren Durchgang nicht leisten konnten, drangen sich in die HBC ein.	[100, 98, 79, 50, 44, 31]	67	[0.2654514735602496, 0.6715584827086242, -0.13950363286393827, -0.89218775095613, -1.1139784275736675, -1.3891679649736568]	-0.4329713033497531	-0.4989306330680847
5560	The total length of dam, wharves, and embankments approached 1.5 mi.	Die Gesamtl√§nge von Damm, Kais und B√∂schungen n√§herte sich 1.5 mi.	[67, 77, 57]	67	[-2.823327539270251, -0.32967577825642896, -1.749690450750551]	-1.63423e+16	-0.34869223833084106
5899	Shredder unmasks himself, revealing the scars that Splinter gave him, and charges towards Splinter to impale him.	Shredder entlarvt sich selbst, enth√ºllt die Narben, die Splinter ihm gab, und klagt Splinter an, ihn zu sp√§hen.	[72, 62, 67]	67	[-0.9439568253313346, -2.1142187257593044, -2.823327539270251]	-1960501030120290	-0.38050174713134766
6108	It starred John Arcilla and Audie Gemora alternating as Cris√≥stomo Ibarra, Monique Wilson as Mar√≠a Clara, and Regine Velasquez as Sisa.	Es spielte John Arcilla und Audie Gemora abwechselnd als Cris√≥stomo Ibarra, Monique Wilson als Mar√≠a Clara und Regine Velasquez als Sisa.	[67, 74, 60]	67	[-2.102528091085145, -0.44144059250339074, -1.9461390140925998]	-1496702565893710	-0.16322466731071472
6421	Crumpets and pikelets are sometimes considered a variety of pancake.	Crumpets und Pikelets werden manchmal als eine Vielzahl von Pfannkuchen.	[78, 67, 56]	67	[0.006776364268776851, -2.3883419898431173, -1.717772850363513]	-1.36645e+16	-0.2376214563846588
6705	Batman confronts them, Olive and Killer Croc escape to a swamp.	Batman konfrontiert sie, Olive und Killer Croc Flucht in einen Sumpf.	[100, 100, 74, 52, 44, 32]	67	[0.2654514735602496, 0.8505318100501577, -0.614933996345165, -0.8116354768518387, -1.1139784275736675, -1.3531117386319325]	-0.46294605929869936	-0.2717890739440918
6779	In this, the demigod Herakles cries out "WHAT SPLENDOUR / IT ALL COHERES" as he is dying.	In diesem ruft der Halbgott Herakles "WAS SPLENDOUR / ES ALLE COHERES", w√§hrend er stirbt.	[70, 64, 67]	67	[-1.2608678885313718, -2.6393923078867014, -2.823327539270251]	-2.2412e+16	-0.45563313364982605
39	The burning propellant generates inert gas which rapidly inflates the airbag in approximately 20 to 30 milliseconds.	Das brennende Treibmittel erzeugt inertes Gas, das den Airbag in etwa 20 bis 30 Millisekunden schnell aufblasen l√§sst.	[55, 62, 85]	67.3333	[-1.5259978765984137, -0.3605398796887971, -0.4917681450113435]	-0.7927686337661847	-0.3746866285800934
3515	Cain tries to trick Nerva by manifesting the Abel persona before resuming his attack.	Kain versucht Nerva zu betr√ºgen, indem er die Abel persona manifestiert, bevor er seinen Angriff wieder aufnimmt.	[53, 71, 78]	67.3333	[-1.9406899378152664, -0.9427811157199508, 0.006776364268776851]	-0.9588982297554801	-0.28378674387931824
4696	In his innings, Ganguly hit four 4s and two sixes, topping the scorers list for the Knight Riders.	In seinen Gasth√∂fen traf Ganguly vier 4s und zwei Achsen und belegte damit die Torsch√ºtzenliste der Ritter-Reiter.	[92, 100, 92, 50, 48, 22]	67.3333	[1.0966153121872513, 0.2654514735602496, 0.1346385006840237, -0.89218775095613, -0.9476250637985012, -1.713674002049177]	-0.34279692172871395	-0.4889602065086365
4860	He branded Kath a "serial shagger" for her many relationships and quipped that she is "supposedly the morally correct one in the Holby harem."	Er brandmarkte Kath einen "seriellen Shagger" f√ºr ihre vielen Beziehungen und witzelte, dass sie "angeblich die moralisch richtige im Holby-Harem" sei.	[89, 100, 90, 51, 46, 29]	67.5	[0.8113570940985152, 0.2654514735602496, -0.0443348266575098, -0.8519116139039844, -1.0308017456860843, -1.4612804176571057]	-0.3852533393743199	-0.4146558940410614
4945	70 Larbre Comp√©tition Corvette into a tyre barrier at the Dunlop chicane halfway through the session and the No.	70 Larbre Comp√©tition Corvette in eine Reifenbarriere an der Dunlop Schikane auf halbem Weg durch die Session und die No.	[88, 100, 92, 35, 55, 35]	67.5	[0.7162710214022698, 0.2654514735602496, 0.1346385006840237, -1.4963298067383144, -0.6565066771919604, -1.244943059606759]	-0.3802364246484151	-0.27960118651390076
5689	In 1177, the Danes again raided the Oder Lagoon area, also the burgh of Wolgast in 1178.	Im Jahr 1177 pl√ºnderten die D√§nen erneut in der Oder Lagune, ebenfalls 1178 in Wolgast.	[100, 99, 75, 50, 46, 35]	67.5	[0.2654514735602496, 0.7610451463793909, -0.5198479236489196, -0.89218775095613, -1.0308017456860843, -1.244943059606759]	-0.44354730999304204	-0.4636474549770355
323	After the Packers referred to them as the ‚ÄúTampa Buccaneers‚Äù, the Buccaneers threatened to introduce the ‚ÄúGreen Packers‚Äù at their next meeting.	Nachdem die Packers sich auf sie bezogen, als die Tampa Buccaneers waren, drohten die Buccaneers, die umweltfreundlichen Packers bei ihrem n√§chsten Treffen vorzustellen.	[61, 74, 68]	67.6667	[-2.2215230440355946, -0.6270457621312975, -2.7297281752450844]	-1.85943e+16	-0.6942898035049438
706	On 7 November, Turgut Reis shelled Bulgarian troops around Tekirdaƒü.	Am 7. November beschoss Turgut Reis bulgarische Truppen um Tekirdaƒü.	[68, 77, 58]	67.6667	[-2.7297281752450844, -0.15167916733124173, -2.907908064122046]	-1.92977e+16	-0.18969981372356415
759	Named after General "Hap" Arnold, first U.S. Air Force Commander.	Benannt nach General "Hap" Arnold, erstem US Air Force Commander.	[55, 72, 76]	67.6667	[-1.7920785461807642, -0.719843458479854, -0.31013469893126033]	-0.9406855678639596	-0.2398035228252411
1006	As suggested by Draupadi, Uttar takes Brihannala with him, as his charioteer.	Wie Draupadi andeutete, nimmt Uttar Brihannala mit, als seinen Wagenf√ºhrer.	[74, 68, 61]	67.6667	[-2.1681319910940844, -1.1854504325226372, -1.1663415676010502]	-1.50664e+16	-0.35781118273735046
1480	The brickwork of the pit walling was originally bagged with lime slurry and featured drainage outlets to all pits.	Das Mauerwerk der Grubenummauerung war urspr√ºnglich mit Kalk-G√ºlle gesackt und verf√ºgte √ºber Entw√§sserungsausl√§sse f√ºr alle Gruben.	[68, 67, 68]	67.6667	[-2.7297281752450844, -1.8345317446803386, -1.577778951731409]	-2047346290552270	-0.498902827501297
1672	These chronicle his voyages into mainland territories in quest of furs.	Diese Chronik seiner Reisen auf dem Festland Territorien auf der Suche nach Pelzen.	[67, 68, 68]	67.6667	[-2.102528091085145, -1.1854504325226372, -0.809169344316621]	-1365715955974800	-0.3860293924808502
1875	With that the Pro Spectaculars went out in a blaze of controversy.	Damit gingen die Pro Spectaculars in einer Flut von Kontroversen aus.	[59, 76, 68]	67.6667	[-1.4948557629117594, -0.4247618509526743, -2.7297281752450844]	-1.54978e+16	-0.42267128825187683
2347	Demeters, in Rhodes and Sparta The thesmophoroi, "the legislators" in the Thesmophoria.	Demeters, in Rhodos und Sparta Die thesmophoroi, "die Gesetzgeber" in der Thesmophoria.	[68, 71, 64]	67.6667	[-2.0130414274143784, -0.6247377243387089, -1.5657947233076184]	-1401191291686900	-0.1796664297580719
2814	The second attack toward Kelbajar also quickly overran the defenders.	Der zweite Angriff auf Kelbajar √ºberlief auch schnell die Verteidiger.	[68, 75, 60]	67.6667	[-2.0130414274143784, -0.5198479236489196, -1.9909615803453176]	-1.50795e+16	-0.36387911438941956
3514	Gen. Samuel W. Crawford marched downriver to Quarles Mill and seized the ford there.	Gen. Samuel W. Crawford marschierte flussabw√§rts nach Quarles Mill und beschlagnahmte dort die Furt.	[68, 73, 62]	67.6667	[-2.7297281752450844, -0.785501293731316, -2.549961409438979]	-2021730292805120	-0.21826070547103882
3553	They copyrighted or trademarked the term "Bigfoot".	Sie urheberrechtlich gesch√ºtzt oder markierten den Begriff "Bigfoot".	[68, 70, 65]	67.6667	[-2.7297281752450844, -1.1657187729600478, -2.2815014184266786]	-205898278887727	-0.3155226409435272
3761	Hitler committed suicide on 30 April as Soviet troops neared his F√ºhrerbunker in Berlin, and Germany surrendered on 7 May 1945.	Hitler beging am 30. April Selbstmord, als sowjetische Truppen sich seinem F√ºhrerbunker in Berlin n√§herten und Deutschland am 7. Mai 1945 kapitulierte.	[68, 63, 72]	67.6667	[-2.7297281752450844, -2.0069144074830136, -1.6550947727313112]	-213057911848647	-0.2348240613937378
3993	At the previous major, it placed third after defeating in the Ninjas in Pyjamas and losing to Fnatic, the eventual champions.	Beim vorherigen Major belegte er den dritten Platz, nachdem er in den Ninjas in Pyjamas besiegt hatte und Fnatic, den letztendlichen Champions, verloren hatte.	[58, 77, 68]	67.6667	[-3.1623342677315947, -0.32967577825642896, -2.7297281752450844]	-2073912740411030	-0.48082050681114197
4178	Seth strengthened into a strong typhoon on October 7, recurving around the periphery of the subtropical ridge, missing Taiwan to the east.	Seth wurde am 7. Oktober zu einem starken Taifun gest√§rkt, der sich an der Peripherie des subtropischen Bergr√ºckens wiederfindet und Taiwan im Osten vermisst.	[62, 71, 70]	67.6667	[-2.1142187257593044, -1.1024123569313533, -1.1657187729600478]	-1.46078e+16	-0.4964452385902405
4198	Un, dos, tres... responda otra vez premiered in April 24, 1972 hosted by .	Un, dos, tres... responda otra vez uraufgef√ºhrt in April 24, 1972 gehostet von.	[100, 86, 72, 40, 48, 60]	67.6667	[0.2654514735602496, -0.798356642233752, -0.8051061417376557, -1.2949491214775863, -0.9476250637985012, -0.3435374010636478]	-0.6540204827918156	-0.24343881011009216
4315	Chief Justice John C. Anderson dissented, agreeing with the defense in many of its motions.	Chief Justice John C. Anderson dissented, zustimmend mit der Verteidigung in vielen seiner Antr√§ge.	[100, 100, 100, 31, 45, 30]	67.6667	[0.2654514735602496, 0.8505318100501577, 0.37321150863630664, -1.6574343549468968, -1.072390086629876, -1.4252241913153814]	-0.4443089734409067	-0.48768430948257446
4509	Retrieved 1 February 2005 "Berlusconi ally jailed for bribery", BBC News, 29 April 2003.	1. Februar 2005 "Berlusconi Verb√ºndeter wegen Bestechung inhaftiert", BBC News, 29. April 2003.	[62, 73, 68]	67.6667	[-1.110579489363207, -0.7100200690414104, -2.0130414274143784]	-1.27788e+16	-0.2772742807865143
5472	Other possibilities included continued skirmishes or ambushes during routine patrolling, or an attempt to interdict a resupply convoy from V≈©ng T√†u.	Weitere M√∂glichkeiten waren fortgesetzte Scharm√ºtzel oder Hinterhalte w√§hrend des Routinepatrouillierens oder der Versuch, einen wiederkehrenden Konvoi von Vÿßng T√†u zu widersprechen.	[100, 90, 74, 50, 60, 32]	67.6667	[0.2654514735602496, -0.0443348266575098, -0.614933996345165, -0.89218775095613, -0.44856497247300275, -1.3531117386319325]	-0.5146136352505817	-0.580130934715271
6183	Dragonfly nymphs vary in form with species and are loosely classed into claspers, sprawlers, hiders, and burrowers.	Libellen-Nymphen unterscheiden sich in Form von Arten und werden lose in Klammern, Verbreitern, Hiders und Burrowers klassifiziert.	[69, 78, 56]	67.6667	[-1.9235547637436115, -0.23458970556018363, -1.470857220269045]	-1.20967e+16	-0.49807071685791016
6297	One of the shots shattered his right eye, traveled through his face, then exited his jaw and reentered his collarbone.	Einer der Sch√ºsse zerbrach sein rechtes Auge, reiste durch sein Gesicht, verlie√ü dann seinen Kiefer und trat wieder in sein Halsbein ein.	[78, 68, 57]	67.6667	[0.006776364268776851, -2.304658550495256, -1.6434671545462618]	-1.31378e+16	-0.3816150426864624
6619	The Feoffees for Impropriations, an organisation that bought benefices and advowsons so that Puritans could be appointed to them, was dissolved.	Die Feoffees for Impropriations, eine Organisation, die Wohltaten und Advowsons kaufte, damit Puritaner zu ihnen ernannt werden konnten, wurde aufgel√∂st.	[68, 75, 60]	67.6667	[-2.7297281752450844, -1.386634781719011, -1.2502945949515705]	-1788885850638550	-0.3114239275455475
6990	Classical style with rendered brickwork and slate roof behind original balustraded parapet.	Klassischer Stil mit gerenderten Mauerwerk und Schiefer Dach hinter original Balustraded Parapet.	[100, 86, 76, 51, 58, 35]	67.6667	[0.2654514735602496, 0.5260988760097791, -1.2971481180482443, -0.8519116139039844, -0.5317416543605858, -1.244943059606759]	-0.5223656827249242	-0.28848081827163696
3363	Shortly after overhearing Bartlett, Fleischer proceeded to discuss Plame with Gregory and Dickerson.	Kurz nach der Anh√∂rung von Bartlett diskutierte Fleischer Plame mit Gregory und Dickerson.	[100, 100, 73, 50, 34, 50]	67.8333	[0.2654514735602496, 0.37321150863630664, -0.7100200690414104, -0.89218775095613, -1.5298618370115828, -0.7040996644808922]	-0.5329177232155765	-0.37031546235084534
4215	In May 2011, Danson teased an "exciting" upcoming storyline involving Leanne.	Im Mai 2011, Danson neckte eine "spannende" kommenden Storyline mit Leanne.	[100, 100, 100, 50, 33, 24]	67.8333	[0.2654514735602496, 0.8505318100501577, 0.37321150863630664, -0.89218775095613, -1.5714501779553744, -1.641561549365728]	-0.4360007810050865	-0.3292272090911865
4635	The interlocking counterpoint of the timbale bell and bongo bell provides a propelling force during the montuno.	Der ineinandergreifende Kontrapunkt der Timbale Glocke und Bongo Glocke sorgt w√§hrend des Montuno f√ºr eine Antriebskraft.	[90, 100, 92, 45, 40, 40]	67.8333	[0.9064431667947606, 0.2654514735602496, 0.1346385006840237, -1.093568436216858, -1.2803317913488337, -1.0646619278981369]	-0.3553381690707991	-0.4303235411643982
4859	Ibn Battuta describes travelling westwards from Eƒüirdir to Milas and then skipping 420 km eastward past Eƒüirdir to Konya.	Ibn Battuta beschreibt die Reise von Eƒüirdir nach Milas nach Westen und √ºberspringt dann 420 km √∂stlich von Eƒüirdir nach Konya.	[73, 100, 90, 51, 43, 50]	67.8333	[-0.7100200690414104, 0.2654514735602496, -0.0443348266575098, -0.8519116139039844, -1.1555667685174589, -0.7040996644808922]	-0.5334135781735011	-0.3052482306957245
5066	1945 disestablishments in the Japanese colonial empire	1945 Aufgel√∂st im japanischen Kolonialreich	[84, 100, 100, 51, 42, 30]	67.8333	[0.33592673061728845, 0.2654514735602496, 0.8505318100501577, -0.8519116139039844, -1.1971551094612505, -1.4252241913153814]	-0.33706348340882003	-0.1161709651350975
5733	In 2008, Armagh Orangemen condemned the flying of paramilitary flags.	2008 verurteilten Armagh Orangemen das Fliegen paramilit√§rischer Flaggen.	[100, 87, 71, 51, 43, 55]	67.8333	[0.2654514735602496, -0.31279481766981004, -0.9001922144339011, -0.8519116139039844, -1.1555667685174589, -0.5238185327722701]	-0.5798054122895292	-0.22056375443935394
606	In 2011, underwater archaeologists raised the anchors of the Queen Anne's Revenge, the flagship vessel of Blackbeard, near Beaufort.	2011 erhoben Unterwasserarch√§ologen die Anker der Queen Anne 's Revenge, dem Flaggschiff von Blackbeard, in der N√§he von Beaufort.	[68, 73, 63]	68	[-2.7297281752450844, -0.785501293731316, -1.0077489937498345]	-1.50766e+16	-0.3043838441371918
1349	In 2007, he auctioned a luncheon with himself that raised a final bid of $650,100 for the Glide Foundation.	Im Jahr 2007 versteigert er ein Mittagessen mit sich selbst, die ein endg√ºltiges Gebot von $650,100 f√ºr die Glide Foundation erhoben.	[68, 73, 63]	68	[-2.7297281752450844, -0.7100200690414104, -1.4086128129541706]	-1616120352413550	-0.4154367446899414
2153	We kidded him a bit with our cocaine and our pills.	Wir haben ihn ein wenig mit unserem Kokain und unseren Pillen entf√ºhrt.	[68, 72, 64]	68	[-2.7297281752450844, -0.8051061417376557, -1.3517665399881071]	-1628866952323610	-0.3508594334125519
2165	In September 2010, the Mint released 3 million $1 circulation coins in celebration of the Saskatchewan Roughriders‚Äô centennial.	Im September 2010 ver√∂ffentlichte die M√ºnzst√§tte 3 Millionen $1 Umlauf M√ºnzen anl√§sslich der Saskatchewan Roughrider hundert Jahre.	[70, 66, 68]	68	[-1.2608678885313718, -1.6850014526541417, -2.7297281752450844]	-1.89187e+16	-0.47988778352737427
2448	At Bound for Glory, Styles defeated Daniels in an "I Quit" match.	Bei Bound for Glory besiegten Styles Daniels in einem "I Quit" -Match.	[75, 68, 61]	68	[-0.5198479236489196, -2.0130414274143784, -1.1663415676010502]	-1.23308e+16	-0.2275122106075287
2557	;Sensing Concrete Realistic Practical Experiential Traditional	; Konkrete realistische praktische Erfahrung zu sp√ºren traditionelle	[68, 78, 58]	68	[-2.7297281752450844, 0.6177824849607275, -2.907908064122046]	-1.67328e+16	-0.6035304665565491
2899	Other deer are roe deer, red deer and reindeer, in the shape of Sami herds or wilded originally tame reindeers.	Andere Hirsche sind Rehe, Rotwild und Rentier, in Form von Sami-Herden oder wilded urspr√ºnglich zahmen Rentieren.	[60, 70, 74]	68	[-1.4205500670945082, -1.1657187729600478, -0.6270457621312975]	-1.0711e+16	-0.4022138714790344
3306	On February 3, 2008, Sparks sang the National Anthem at Super Bowl XLII.	Am 3. Februar 2008 sang Sparks die Nationalhymne bei Super Bowl XLII.	[67, 69, 68]	68	[-0.9004101963737501, -1.0903643598263917, -2.7297281752450844]	-1573500910481740	-0.17753295600414276
3953	The lower legs twist beneath the hocks, causing interfering.	Die Unterbeine verdrehen sich unter den H√∂cken, was st√∂rend wirkt.	[63, 73, 68]	68	[-3.197724995370918, -0.785501293731316, -2.0130414274143784]	-1.99876e+16	-0.6200783848762512
4138	Howison obtained a fellowship from the University of California for his protege to study at the University of Leipzig.	Howison erhielt ein Stipendium von der University of California f√ºr seine Protege an der Universit√§t Leipzig zu studieren.	[68, 59, 77]	68	[-2.7297281752450844, -2.818421400451279, -0.15167916733124173]	-1.89994e+16	-0.2603575587272644
4867	Madame Nhu's aggressive stance and persistent calls for Khanh to attack, prompted the general to threaten to leave.	Madame Nhus aggressive Haltung und hartn√§ckige Aufrufe, Khanh anzugreifen, veranlassten den General, zu drohen, wegzugehen.	[61, 75, 68]	68	[-2.6394480731097456, -0.5198479236489196, -1.1243814481238537]	-1.42789e+16	-0.4244225025177002
5265	Within days of Antony's expulsion, on 7 January 49 BC, the Senate reconvened.	Innerhalb von Tagen von Antony 's Vertreibung, am 7. Januar 49 BC, kam der Senat wieder zusammen.	[68, 68, 68]	68	[-2.7297281752450844, -1.577778951731409, -2.304658550495256]	-2.20406e+16	-0.31924116611480713
5336	Rapid intensification ensued, with Tim reaching typhoon intensity late on July 8, peaking at 125 kn on July 10.	Die schnelle Intensivierung folgte, mit Tim erreichen Taifun Intensit√§t sp√§t am 8. Juli, H√∂hepunkt 125 kn am 10. Juli.	[76, 68, 60]	68	[-0.4247618509526743, -2.0130414274143784, -1.2502945949515705]	-1.22937e+16	-0.5050429105758667
5712	The Klan opposed bootleggers, sometimes with violence.	Die Klan widersetzten sich Bootleggern, manchmal mit Gewalt.	[68, 75, 61]	68	[-1.0670421201073723, -0.5198479236489196, -2.6394480731097456]	-1408779372288670	-0.4224056899547577
5866	Some of the more popular cheeses are Cheddar, Red Leicester, Wensleydale, Double Gloucester and Blue Stilton.	Einige der beliebtesten K√§se sind Cheddar, Red Leicester, Wensleydale, Double Gloucester und Blue Stilton.	[68, 77, 59]	68	[-2.7297281752450844, -0.32967577825642896, -1.6359979048184243]	-1.56513e+16	-0.12428877502679825
6163	By sending Walker his resignation, Crapsey relieved Walker of the duty of deposing.	Durch den R√ºcktritt von Walker entlastete Crapsey Walker die Hinterlegungspflicht.	[68, 59, 77]	68	[-2.0130414274143784, -1.3579262516799813, -0.32967577825642896]	-1.23355e+16	-0.44110041856765747
6512	Guerrero and Benoit feuded with Ric Flair for a while and Guerrero lost a match to Flair at King of the Ring.	Guerrero und Benoit feuerten eine Weile mit Ric Flair und Guerrero verlor ein Spiel mit Flair bei King of the Ring.	[53, 70, 81]	68	[-1.9406899378152664, -1.1657187729600478, 0.4821429590688326]	-0.8747552505688273	-0.38174983859062195
6564	Some gossip columns rumored a romance between the two.	Einige Klatsch Spalten Ger√ºcht eine Romantik zwischen den beiden.	[81, 68, 55]	68	[0.4821429590688326, -2.304658550495256, -1.7920785461807642]	-1204864712535720	-0.4323750138282776
6637	He proclaims himself a Catholic, at which Celia laughs.	Er verk√ºndet sich als Katholik, √ºber den Celia lacht.	[68, 76, 60]	68	[-2.7297281752450844, -0.4247618509526743, -2.8454232045315577]	-1999971076909770	-0.34720146656036377
6978	Rushworth divorces her and Mr Crawford refuses to marry her.	Rushworth scheidet sie und Herr Crawford weigert sich, sie zu heiraten.	[68, 75, 61]	68	[-2.7297281752450844, -0.5198479236489196, -1.4128025969781413]	-1.55413e+16	-0.2095099836587906
497	Donald Trump swept all counties across the Upper Peninsula except Marquette County.	Donald Trump fegte alle Grafschaften √ºber die Upper Peninsula mit Ausnahme von Marquette County.	[100, 84, 90, 50, 45, 40]	68.1667	[0.2654514735602496, -0.9657235209294747, 0.9064431667947606, -0.89218775095613, -1.072390086629876, -1.0646619278981369]	-0.4705114410097679	-0.32995790243148804
1733	The Kingdom of Ava attacked Arakan in 1404 A.D. Burmese General Minyekyawswa ousted the Arakin king Narameikhla.	Das K√∂nigreich von Ava angegriffen Arakan 1404 A.D. birmanischen General Minyekyawswa verdr√§ngte die Arakin K√∂nig Narameikhla.	[100, 88, 94, 40, 47, 40]	68.1667	[0.2654514735602496, 0.7162710214022698, 0.3136118280255572, -1.2949491214775863, -0.9892134047422928, -1.0646619278981369]	-0.34224835518832325	-0.207407608628273
2271	Six 'Big Bens' followed, similar to the 'Small Bens' but with slighter larger boilers.	Sechs 'Big Bens' folgten, √§hnlich wie die 'Small Bens' aber mit kleineren gr√∂√üeren Kesseln.	[100, 79, 78, 64, 48, 40]	68.1667	[0.2654514735602496, -1.028688127035944, -0.23458970556018363, -0.32832183222609124, -0.9476250637985012, -1.0646619278981369]	-0.5564058638264345	-0.3678349256515503
3520	after gaining fame as the jewel thief "The Wraith".	nach Ruhm als der Juwelendieb "The Wraith".	[75, 68, 82, 60, 54, 70]	68.1667	[-2.0745326270689177, -2.0130414274143784, 0.14575458522479776, -0.48942638043467374, -0.698095018135752, 0.017024862353596727]	-0.8520526675792213	-0.41601917147636414
5384	The Japanese torpedoes hit and sank the U.S. cruiser and heavily damaged the cruisers , , and .	Die japanischen Torpedos trafen und sanken den US-Kreuzer und besch√§digten die Kreuzer schwer, und.	[100, 94, 82, 57, 44, 32]	68.1667	[0.2654514735602496, 0.3136118280255572, 0.14575458522479776, -0.6102547915911106, -1.1139784275736675, -1.3531117386319325]	-0.392087845164351	-0.3441067337989807
4849	Jade maidens, four or five persons, Gliding and whirling descend from the Nine Peripheries.	Jade M√§gde, vier oder f√ºnf Personen, Gleiten und Wirbeln steigen von den Neun Peripherien ab.	[92, 100, 95, 50, 48, 25]	68.3333	[1.0966153121872513, 0.2654514735602496, 0.40309849169632395, -0.89218775095613, -0.9476250637985012, -1.6055053230240035]	-0.2800254767224683	-0.4023846983909607
4918	Despite frequent wins, Davies often finishes last due to incurring forfeits.	Trotz h√§ufigen Siegen, Davies endet oft zuletzt wegen eintretenden F√§lschungen.	[100, 89, 91, 45, 52, 33]	68.3333	[0.2654514735602496, 0.8113570940985152, 0.04515183701325695, -1.093568436216858, -0.7812717000233351, -1.317055512290208]	-0.3449892073097299	-0.5977388620376587
4951	She returned the compliment more accurately than her adversaries, as her antiaircraft battery splashed two of the offending bombers.	Sie gab das Kompliment genauer zur√ºck als ihre Gegner, als ihre Antiflugzeug-Batterie zwei der beleidigenden Bomber spritzte.	[100, 95, 77, 50, 48, 40]	68.3333	[0.2654514735602496, 0.40309849169632395, -0.32967577825642896, -0.89218775095613, -0.9476250637985012, -1.0646619278981369]	-0.4276000926087706	-0.39900726079940796
6486	Cheetah cubs face higher mortality than most other large mammals.	Geparden ist die Sterblichkeit h√∂her als den meisten anderen gro√üen S√§ugetieren.	[73, 54, 78]	68.3333	[-0.7100200690414104, -2.9726532719696293, 0.006776364268776851]	-1225298992247420	-0.43522730469703674
4223	After the pardon, Arpaio filed a motion to vacate his conviction for criminal contempt.	Nach der Begnadigung reichte Arpaio einen Antrag auf seine Verurteilung wegen strafrechtlicher Verachtung zu r√§umen.	[100, 81, 100, 51, 48, 31]	68.5	[0.2654514735602496, -0.8497147996944105, 0.37321150863630664, -0.8519116139039844, -0.9476250637985012, -1.3891679649736568]	-0.5666260766956661	-0.37302401661872864
4685	Attila went through Alsace in 451, devastating the country and destroying Mainz and Triers with their Roman garrisons.	Attila durchquerte 451 das Elsass, zerst√∂rte das Land und zerst√∂rte Mainz und Triers mit ihren r√∂mischen Garnisonen.	[100, 89, 75, 51, 46, 50]	68.5	[0.2654514735602496, -0.13382149032827656, -0.5198479236489196, -0.8519116139039844, -1.0308017456860843, -0.7040996644808922]	-0.4958384940813179	-0.21504516899585724
4723	Train antagonized many activists by attacking the Republican Party and openly disparaging the integrity and intelligence of African Americans.	Der Zug widersetzte sich vielen Aktivisten, indem er die Republikanische Partei angriff und die Integrit√§t und Intelligenz der Afroamerikaner offen verunglimpfte.	[80, 100, 86, 45, 50, 50]	68.5	[-0.04441756016769294, 0.2654514735602496, -0.4022814813405768, -1.093568436216858, -0.8644483819109182, -0.7040996644808922]	-0.4738940084261148	-0.3897974491119385
4817	Mac resisted Billy‚Äôs advances, and when he grabbed and kissed her, she slapped him.	Mac widerstand Billy sucht Fortschritte, und als er packte und k√ºsste sie, schlug sie ihn.	[93, 100, 91, 61, 34, 32]	68.5	[1.1917013848834965, 0.2654514735602496, 0.04515183701325695, -0.44915024338252807, -1.5298618370115828, -1.3531117386319325]	-0.3049698539281734	-0.3581589162349701
6174	While their grandmother attends to her own business, Mother Goose babysits the twins.	W√§hrend ihre Gro√ümutter sich um ihr eigenes Gesch√§ft k√ºmmert, babysit Mutter G√§nse die Zwillinge.	[100, 77, 94, 45, 55, 40]	68.5	[0.2654514735602496, -0.32967577825642896, 0.3136118280255572, -1.093568436216858, -0.6565066771919604, -1.0646619278981369]	-0.42755825299626293	-0.42338985204696655
368	2 Armoured Car Company RAF under Squadron Leader Michael Casano waiting there.	2 R√ºstung Car Company RAF unter Squadron Leader Michael Casano wartet dort.	[58, 79, 69]	68.6667	[-2.543435998864467, 0.16523189586879544, -2.6361288112199177]	-1.67144e+16	-0.36595454812049866
844	He also published six bulletins on sweet potatoes, five on cotton, and four on cowpeas.	Er ver√∂ffentlichte auch sechs Bulletins auf S√º√ükartoffeln, f√ºnf auf Baumwolle und vier auf Kautschukerbsen.	[75, 69, 62]	68.6667	[-0.5198479236489196, -1.9235547637436115, -1.813846650243113]	-1.41908e+16	-0.2701469957828522
946	15, and reached the final beating Kevin Anderson and Rafael Nadal in the quarterfinals and semifinals respectively.	15, und erreichte das Finale schlagen Kevin Anderson und Rafael Nadal im Viertelfinale bzw. Halbfinale.	[69, 79, 58]	68.6667	[-2.6361288112199177, 0.16523189586879544, -2.907908064122046]	-1.79293e+16	-0.2543178200721741
1342	The Tshwane Regiment, A reserve motorised infantry regiment of the South African Army.	Das Tshwane Regiment, Eine Reserve motorisierte Infanterie Regiment der s√ºdafrikanischen Armee.	[69, 76, 61]	68.6667	[-1.9235547637436115, -0.4247618509526743, -1.1951539386222017]	-1.18116e+16	-0.27182304859161377
1740	Staff Paymaster Heinze walked past one of the covers, spotted them and spat at them calling them "stinking swines."	Personal Paymaster Heinze ging an einer der Abdeckungen vorbei, entdeckte sie und spuckte sie an und nannte sie "stinkende Schweine".	[100, 99, 87, 50, 45, 31]	68.6667	[0.2654514735602496, 0.7610451463793909, 0.6211849487060245, -0.89218775095613, -1.072390086629876, -1.3891679649736568]	-0.28434403898566624	-0.3431250751018524
1866	Another John Orr farmed here with his spouse Janet Wilson.	Ein anderer John Orr landete hier mit seiner Ehefrau Janet Wilson.	[100, 96, 75, 51, 45, 45]	68.6667	[0.2654514735602496, 0.4925851553670907, -0.5198479236489196, -0.8519116139039844, -1.072390086629876, -0.8843807961895145]	-0.4284156319074923	-0.37830203771591187
2132	Early on July 9, the JMA upgraded the depression to Tropical Storm Nakri near western Taiwan.	Am fr√ºhen 9. Juli steigerte die JMA die Depression auf den Tropensturm Nakri im Westen Taiwans.	[69, 76, 61]	68.6667	[-2.6361288112199177, -0.31013469893126033, -1.5978448495433426]	-1.5147e+16	-0.3845815360546112
2252	Anger over the outlawing of the political banquets brought crowds of Parisians flooding out onto the streets at noon on 22 February 1848.	Die Wut √ºber das Verbot der politischen Bankette brachte am 22. Februar 1848 mittags Massen von Parisern auf die Stra√üe, die √ºberschwemmten.	[69, 72, 65]	68.6667	[-2.6361288112199177, -0.719843458479854, -2.2815014184266786]	-187915789604215	-0.5454660058021545
2380	Other impalement devices included bamboo whips and triggered sapling spikes.	Andere Impalement-Ger√§te beinhalteten Bambuspeitschen und l√∂ste rissige Spitzen aus.	[79, 69, 58]	68.6667	[-0.13950363286393827, -1.9235547637436115, -1.6928441777844876]	-1.25197e+16	-0.6098318099975586
2477	Mesocyclones moving around Opal's eastern periphery within Maryland spawned three tornadoes in Charles, Prince George's, and Anne Arundel County.	Mesocyclone, die sich in der √∂stlichen Peripherie von Opal innerhalb von Maryland bewegen, haben drei Tornados in Charles, Prince George 's und Anne Arundel County hervorgebracht.	[73, 64, 69]	68.6667	[-0.785501293731316, -1.5657947233076184, -2.6361288112199177]	-1.66247e+16	-0.35986781120300293
2630	The Red Army's 1st and 2nd Ukrainian Fronts encircled the pocket.	Die ersten und zweiten ukrainischen Fronten der Roten Armee umzingelten die Tasche.	[100, 79, 98, 50, 55, 30]	68.6667	[0.2654514735602496, -0.13950363286393827, 0.6715584827086242, -0.89218775095613, -0.6565066771919604, -1.4252241913153814]	-0.36273538267642275	-0.3085055649280548
3203	In the end, the Synod of Dort condemned the Remonstrants for heresy and excommunicated them from the national Public Church.	Am Ende verurteilte die dortige Synode die Remonstranten wegen Ketzerei und exkommunizierte sie aus der Landeskirche.	[69, 70, 67]	68.6667	[-2.6361288112199177, -0.9952782871301464, -1.7362344833314276]	-1.78921e+16	-0.29469752311706543
3518	This angers Jamie, so he and Lee plan to rob the bistro to frighten Steph.	Dies √§rgert Jamie, so dass er und Lee planen, das Bistro zu berauben, um Stef zu erschrecken.	[63, 74, 69]	68.6667	[-1.0548174111253639, -0.614933996345165, -1.9235547637436115]	-1.19777e+16	-0.399482786655426
3666	Everglades National Park covers 1509000 acre, throughout Dade, Monroe, and Collier counties in Florida.	Everglades National Park umfasst 1509000 Hektar, in Dade, Monroe und Collier County in Florida.	[76, 69, 61]	68.6667	[-0.4247618509526743, -1.9235547637436115, -1.5223053588862974]	-1.29021e+16	-0.26676374673843384
3852	See Behrman v Regional Magistrate, Southern Transvaal.	Siehe Behrman / Regional Magistrat, Southern Transvaal.	[74, 63, 69]	68.6667	[-0.6270457621312975, -2.0069144074830136, -2.6361288112199177]	-1756696326944740	-0.19796738028526306
4336	Eventually she participates in numerous telecasts, produced by Luis de Llano Palmer.	Schlie√ülich beteiligt sie sich an zahlreichen Telekommunikationen, produziert von Luis de Llano Palmer.	[69, 60, 77]	68.6667	[-2.6361288112199177, -1.2221036458388934, -0.15167916733124173]	-1.33664e+16	-0.35069721937179565
4364	Depredation and plunder by the Moros from Jolo and Brunei were rampant during the 1600s.	Verzweiflung und Pl√ºnderung durch die Moros von Jolo und Brunei waren in den 1600er Jahren grassierend.	[74, 69, 63]	68.6667	[-0.614933996345165, -1.9235547637436115, -1.7252891851920107]	-1.42126e+16	-0.3710575997829437
4799	As of 2006 there were more than 70 Augustinian priories in the United States and Canada with 386 friars in solemn vows and 16 in simple vows.	Seit 2006 gab es in den Vereinigten Staaten und Kanada mehr als 70 Augustinpriorit√§ten mit 386 Ordensbr√ºdern in feierlichen Gel√ºbden und 16 in einfachen Gel√ºbden.	[100, 100, 88, 45, 54, 25]	68.6667	[0.2654514735602496, 0.8505318100501577, 0.7162710214022698, -1.093568436216858, -0.698095018135752, -1.6055053230240035]	-0.26081907872732274	-0.29682794213294983
5097	Halladay pitched 2 hitless innings, and Drabek pitched 2 innings giving up 2 runs on 3 hits.	Halladay schlug 2 reibungslose Innings auf, und Drabek schlug 2 Innings auf, die 2 L√§ufe auf 3 Hits aufgeben.	[68, 78, 93, 50, 68, 55]	68.6667	[-1.1854504325226372, -1.7937345349934175, 0.22412516435479046, -0.89218775095613, -0.11585824492267038, -0.5238185327722701]	-0.7144873886353892	-0.3821167051792145
5244	As a wealthy Maryland wheat farmer, Edward Gorsuch had manumitted several slaves in their 20s.	Als wohlhabender Weizenbauer von Maryland hatte Edward Gorsuch in den 20er Jahren mehrere Sklaven besetzt.	[69, 75, 62]	68.6667	[-2.6361288112199177, -0.5198479236489196, -2.5285121413315204]	-1.89483e+16	-0.3920540511608124
5375	Australia beat Pakistan, and gained further momentum by defeating India by nine wickets in less than half their allotted overs in the next match.	Australien schlug Pakistan und gewann weiteren Schwung, indem es Indien durch neun Pforten in weniger als der H√§lfte ihrer zugeteilten √úbersch√ºsse im n√§chsten Spiel besiegte.	[69, 74, 63]	68.6667	[-1.9235547637436115, -0.27396814399966013, -1.6608807960038638]	-1.28613e+16	-0.4200116991996765
6111	The ninth canon stands on its own due to compositional dissimilarities.	Der neunte Kanon steht allein aufgrund kompositorischer Unterschiede.	[63, 74, 69]	68.6667	[-1.0548174111253639, -0.614933996345165, -1.9235547637436115]	-1.19777e+16	-0.35676705837249756
6171	Nelson pitched five more scoreless innings, walked only one, allowed five hits, and struck out seven.	Nelson schlug f√ºnf weitere torlose Innings auf, ging nur eine, erlaubte f√ºnf Treffer und schlug sieben aus.	[76, 69, 61]	68.6667	[-1.2971481180482443, -0.7469358122289209, -1.8510529413963546]	-1.29838e+16	-0.3902287483215332
4779	She often teases her adoptive brother Toha, leaving most of the housework and chores to him, but cares deeply about him.	Oft neckt sie ihren Adoptivbruder Toha, √ºberl√§sst ihm die meiste Hausarbeit und k√ºmmert sich um ihn, k√ºmmert sich aber tief um ihn.	[100, 92, 72, 61, 48, 40]	68.8333	[0.2654514735602496, 0.1346385006840237, -0.8051061417376557, -0.44915024338252807, -0.9476250637985012, -1.0646619278981369]	-0.4777422337620914	-0.4812289774417877
5	They engaged in crossfire at Guaman√≠ River Bridge, Coamo and Silva Heights and finally at the Battle of Asomante.	Sie ver√ºbten Kreuzfeuer an der Guaman√≠ River Bridge, Coamo und Silva Heights und schlie√ülich an der Schlacht von Asomante.	[61, 58, 88]	69	[-1.1951539386222017, -0.5618980011753706, -0.2233081539990433]	-0.6601200312655385	-0.34649428725242615
421	North American river otters can produce a snarling growl or hissing bark when bothered, and a shrill whistle when in pain.	Nordamerikanische Flussotter k√∂nnen ein knurrendes Knurren oder Zischen der Rinde erzeugen, wenn sie gest√∂rt werden, und eine schrille Pfeife, wenn sie Schmerzen haben.	[72, 61, 74]	69	[-0.8051061417376557, -2.2215230440355946, -0.6270457621312975]	-1217891649301510	-0.3863908350467682
694	In return, the Palatines taught the Iroquois how to grow wheat and oats, and how to use iron ploughs and hoes to farm.	Im Gegenzug lehrten die Palatin die Irokesen, wie man Weizen und Hafer anbaut und wie man eiserne Pfl√ºge und Hacken f√ºr die Landwirtschaft verwendet.	[69, 71, 67]	69	[-2.6361288112199177, -1.1024123569313533, -0.7693567586692285]	-1.50263e+16	-0.43566298484802246
1620	In the United States, Cleartron briefly produced the "Multivalve" triple triode for use in the Emerson Baby Grand receiver.	In den USA produzierte Cleartron kurz die Triode "Multivalve" f√ºr den Emerson Baby Grand Empf√§nger.	[69, 76, 62]	69	[-1.9235547637436115, -0.4247618509526743, -1.140013282292833]	-1.16278e+16	-0.2655441164970398
2033	In addition, the Blazers wore an "Earned" uniform by virtue of qualifying in the 2018 playoffs.	Dar√ºber hinaus trug die Blazers eine "Earned" Uniform aufgrund der Qualifikation in den Playoffs 2018.	[69, 75, 63]	69	[-2.6361288112199177, -0.5198479236489196, -1.4086128129541706]	-1521529849274330	-0.25297510623931885
2190	Grasshoppers, locusts, silkworms, snails, eels, wild fowl, squab and other birds, venison are also eaten, albeit in moderation.	Heuschrecken, Heuschrecken, Seidenraupen, Schnecken, Aale, Wildv√∂gel, Jungv√∂gel und andere V√∂gel, Wildtiere werden ebenfalls gegessen, wenn auch in Ma√üen.	[69, 73, 65]	69	[-2.6361288112199177, -1.8862413537559495, -1.0490215880082523]	-185713058432804	-0.24449150264263153
2394	Others sire fillies of great abilities but not colts.	Andere Vater Fillies von gro√üen F√§higkeiten, aber nicht Fohlen.	[69, 77, 61]	69	[-2.6361288112199177, -0.15167916733124173, -2.6394480731097456]	-1.80909e+16	-0.508886992931366
3292	Lucrezia asks Isabella to prick Elisa with a poisoned rose at the funeral of Count Drago.	Lucrezia bittet Isabella, Elisa beim Begr√§bnis des Grafen Drago mit einer vergifteten Rose zu stacheln.	[69, 77, 61]	69	[-1.9235547637436115, -0.32967577825642896, -1.1951539386222017]	-1.14946e+16	-0.1991209089756012
3302	In 2011, Dr. Dwight Pfennig, Superintendent since March 2005, announced his retirement, effective August 31, 2011.	Im Jahr 2011 k√ºndigte Dr. Dwight Pfennig, seit M√§rz 2005 Superintendent, seinen Ruhestand per 31. August 2011 an.	[58, 76, 73]	69	[-1.5691614587290106, 0.1719071704805337, -0.785501293731316]	-0.7275851939932644	-0.28443896770477295
3314	Although he pitched well, he tired in the sixth inning, surrendering all four runs.	Obwohl er gut schlug, m√ºde er in der sechsten Inning, Verzicht auf alle vier L√§ufe.	[77, 61, 69]	69	[-0.15167916733124173, -2.2215230440355946, -2.6361288112199177]	-1669777007528910	-0.4500041902065277
3896	A terrible liar, because his obtuseness invariably leads to him giving himself away.	Ein schrecklicher L√ºgner, denn seine Hartn√§ckigkeit f√ºhrt unweigerlich dazu, dass er sich selbst verschenkt.	[100, 100, 90, 51, 48, 25]	69	[0.2654514735602496, 0.8505318100501577, -0.46362288484230674, -0.8519116139039844, -0.9476250637985012, -1.6055053230240035]	-0.45878026699306473	-0.39275890588760376
4318	To circumvent these rules, two "separate" barsone topless and one fully nudemay open adjacent to one another.	Um diese Regeln zu umgehen, zwei "separate" barsone oben ohne und eine vollst√§ndig nudemay offen nebeneinander.	[69, 76, 62]	69	[-1.0019344653211597, -0.4247618509526743, -2.549961409438979]	-1.32555e+16	-0.3800794184207916
4394	She often wears loud clothing which aggrivates Jake.	Sie tr√§gt oft laute Kleidung, die Jake qu√§lt.	[100, 82, 91, 40, 56, 45]	69	[0.2654514735602496, -0.7602281360236438, -0.37993944549444536, -1.2949491214775863, -0.6149183362481689, -0.8843807961895145]	-0.6114940603121849	-0.3228740692138672
4815	Thai King Bhumibol Adulyadej and Thai Queen Sirikit also sent a missive of condolences to Haitian President Rene Preval.	Der thail√§ndische K√∂nig Bhumibol Adulyadej und die thail√§ndische K√∂nigin Sirikit √ºbermittelten dem haitianischen Pr√§sidenten Rene Preval ebenfalls ein Beileid.	[69, 72, 66]	69	[-2.6361288112199177, -0.8051061417376557, -1.894690014931446]	-1.77864e+16	-0.2089003324508667
5272	About , Bertrand de Forcade, Curate of Gabas, assisted at the marriage by notarized contract between Catherine de Plasence and Jaymes de Tr√©sarriu.	√úber, Bertrand de Forcade, Kurat von Gabas, bei der Ehe durch notarielle Vertrag zwischen Catherine de Plasence und Jaymes de Tr√©sarriu unterst√ºtzt.	[69, 67, 71]	69	[-2.6361288112199177, -1.7362344833314276, -0.9001922144339011]	-1.75752e+16	-0.2203235626220703
5555	Near Vƒõt≈ôn√≠, a dinghy containing three occupants capsized, one of which drowned.	In der N√§he von Vƒõt≈ôn√≠, ein Schlauchboot mit drei Insassen gekentert, von denen einer ertrunken.	[100, 86, 78, 55, 55, 40]	69	[0.2654514735602496, -0.4022814813405768, -0.23458970556018363, -0.6908070656954018, -0.6565066771919604, -1.0646619278981369]	-0.4638992306876683	-0.2813695967197418
5629	After that, she prepares her tuxedo for the demented prom, foreshadowing the torturous events of "Welcome to the Dollhouse".	Danach bereitet sie ihren Regler auf den dementierten Prom vor, der die qu√§lenden Ereignisse von "Welcome to the Dollhouse" voraussieht.	[100, 93, 84, 50, 56, 31]	69	[0.2654514735602496, 0.22412516435479046, 0.33592673061728845, -0.89218775095613, -0.6149183362481689, -1.3891679649736568]	-0.3451284472742712	-0.3951166272163391
6068	Similar small whare, but with interior drains, were used to store k≈´mara on sloping racks.	√Ñhnliche kleine Whare, aber mit Innenabfluss, wurden verwendet, um k≈´mara auf abfallenden Regalen zu speichern.	[69, 66, 72]	69	[-2.6361288112199177, -1.894690014931446, -1.6550947727313112]	-2.06197e+16	-0.5205859541893005
6625	Ng Chin Han portrays Lau, a corrupt Chinese LSI Holdings accountant Triad boss.	Ng Chin Han portr√§tiert Lau, einen korrupten chinesischen LSI Holdings Buchhalter Triad Chef.	[77, 69, 61]	69	[-0.15167916733124173, -2.2209751111473945, -1.3462443712772572]	-1.23963e+16	-0.18242354691028595
4168	On Day 49, Adam nominated Damien and Estefania for eviction.	Am Tag 49 ernannte Adam Damien und Estefania zur R√§umung.	[100, 94, 71, 45, 55, 50]	69.1667	[0.2654514735602496, 0.3136118280255572, -0.9001922144339011, -1.093568436216858, -0.6565066771919604, -0.7040996644808922]	-0.4625506151229675	-0.2727673351764679
5754	Legitimate cowmen were referred to as cattle herders or ranchers.	Legitime Cowmen wurden als Viehz√ºchter oder Viehz√ºchter bezeichnet.	[100, 100, 91, 50, 49, 25]	69.1667	[0.2654514735602496, 0.8505318100501577, 1.0015292394910058, -0.89218775095613, -0.9060367228547097, -1.6055053230240035]	-0.2143695456222383	-0.19269244372844696
2091	They contain a brushed internal mechanical commutation to reverse motor windings' current in synchronism with rotation.	Sie enthalten eine geb√ºrstete interne mechanische Kommutation, um den Strom der Motorwicklungen synchron mit der Rotation umzukehren.	[76, 81, 51]	69.3333	[-0.4247618509526743, -0.0754366785097826, -4.271522988931725]	-1.59057e+16	-0.43588384985923767
2139	Within the Odyssey, omens frequently involve birds.	Innerhalb der Odyssee, Omen h√§ufig beteiligt V√∂gel.	[100, 74, 94, 51, 52, 45]	69.3333	[0.2654514735602496, -1.4761214453897777, 1.2867874575797418, -0.8519116139039844, -0.7812717000233351, -0.8843807961895145]	-0.4069077707277701	-0.5227563381195068
2221	It derives from the intuition of "memory" as a scratchpad.	Sie leitet sich von der Intuition des "Ged√§chtnisses" als Kratzer ab.	[73, 74, 61]	69.3333	[-1.5656081090605445, -0.614933996345165, -1.5223053588862974]	-1.23428e+16	-0.31244251132011414
2384	Most of the treatise consists of tables of diminutions of intervals, small melodies and cadences, categorized by their meter.	Die meisten der Abhandlung besteht aus Tabellen von Verkleinerungen der Intervalle, kleine Melodien und Kadenzen, nach ihren Z√§hler kategorisiert.	[79, 77, 52]	69.3333	[-1.028688127035944, -0.32967577825642896, -2.033921815580868]	-1130761906957740	-0.3493768870830536
4139	The Torchwood comic Captain Jack and the Selkie features a Selkie.	Die Torchwood Comic Captain Jack und die Selkie verf√ºgt √ºber eine Selkie.	[100, 80, 91, 51, 34, 60]	69.3333	[0.2654514735602496, -0.9392014633651773, -0.37993944549444536, -0.8519116139039844, -1.5298618370115828, -0.3435374010636478]	-0.629833381213098	-0.29523327946662903
6054	Later in the afternoon, around sunset, a Confederate counterattack nearly drove the IX Corps back across Antietam Creek.	Sp√§ter am Nachmittag, gegen Sonnenuntergang, fuhr ein Confederate Gegenangriff fast das IX Corps zur√ºck √ºber Antietam Creek.	[100, 85, 92, 49, 45, 45]	69.3333	[0.2654514735602496, 0.4310128033135338, 0.1346385006840237, -0.9324638880082756, -1.072390086629876, -0.8843807961895145]	-0.3430219988783098	-0.37302201986312866
4186	1962 disestablishments in the French colonial empire	Aufgel√∂st 1962 im franz√∂sischen Kolonialreich	[100, 88, 100, 50, 49, 30]	69.5	[0.2654514735602496, -0.2233081539990433, 0.37321150863630664, -0.89218775095613, -0.9060367228547097, -1.4252241913153814]	-0.46801563948811803	-0.10653989762067795
4862	Harvey Harman, a Pitt tackle, coached at Penn and Rutgers.	Harvey Harman, ein Pitt-Ger√§t, gecoacht bei Penn und Rutgers.	[75, 100, 93, 51, 48, 50]	69.5	[-0.5198479236489196, 0.2654514735602496, 0.22412516435479046, -0.8519116139039844, -0.9476250637985012, -0.7040996644808922]	-0.4223179379862096	-0.28340834379196167
6908	In Middlesex, Cal acts out the story of Hermaphroditus, the Greek deity of bisexuality and effeminacy, while eking out a living in San Francisco.	In Middlesex erz√§hlt Cal die Geschichte von Hermaphroditus, der griechischen Gottheit der Bisexualit√§t und Wirksamkeit, w√§hrend er in San Francisco lebt.	[100, 83, 89, 50, 45, 50]	69.5	[0.2654514735602496, 0.2408406579210431, -0.13382149032827656, -0.89218775095613, -1.072390086629876, -0.7040996644808922]	-0.38270114348564704	-0.3044716715812683
186	The South Carolina Convention then met and rescinded its nullification ordinance, but in a final show of defiance, nullified the Force Bill.	Die South Carolina Convention traf sich dann und hob ihre Nichtigkeitsurteil, aber in einer letzten Show der Missachtung, hob die Force Bill.	[65, 74, 70]	69.6667	[-1.7923057709304324, -0.6270457621312975, -2.542529447194751]	-1.65396e+16	-0.5335473418235779
349	On 28 December, Naval vessels shelled the Port of Gaza.	Am 28. Dezember beschossen Schiffe den Hafen von Gaza.	[70, 72, 67]	69.6667	[-2.542529447194751, -0.9439568253313346, -2.102528091085145]	-1.863e+16	-0.36645811796188354
353	At first, equines, both horses and onagers, were hitched to wheeled carts by means of a yoke around their necks in a manner similar to that of oxen.	Zun√§chst wurden Pferde und Einsteiger mit einem Joch um den Hals √§hnlich wie Ochsen an Radkarren befestigt.	[70, 68, 71]	69.6667	[-2.542529447194751, -0.7760070199361482, -1.1024123569313533]	-1.47365e+16	-0.6092364192008972
1129	Soloists were William Sandford, euphonium; Charles Elder, clarinet; William Steele, cornet.	Solisten waren William Sandford, euphonium; Charles Elder, Klarinette; William Steele, cornet.	[70, 70, 69]	69.6667	[-2.542529447194751, -0.9952782871301464, -0.720244941698305]	-1.41935e+16	-0.136089488863945
1426	On arriving in Oxford, Vermigli began lecturing on 1 Corinthians, denouncing Catholic doctrines of purgatory, clerical celibacy, and lenten fasting.	Als Vermigli in Oxford ankam, begann er Vorlesungen √ºber 1 Korinther zu halten und verurteilte katholische Lehren vom Fegefeuer, klerikalen Z√∂libat und Fastenzeit.	[69, 70, 70]	69.6667	[-1.4193234201313905, -0.9952782871301464, -2.542529447194751]	-1.65238e+16	-0.3214171230792999
1577	Anna journeys to and then through Verea into the lair of the Demons.	Anna reist zu und dann durch Verea in die H√∂hle der D√§monen.	[72, 67, 70]	69.6667	[-0.8051061417376557, -1.7362344833314276, -2.542529447194751]	-1.69462e+16	-0.4057384729385376
1813	Shostakovich heightens its appearance by quoting it not in its initial tonality but in the key of its heroic triumph at the symphony's conclusion.	Schostakowitsch verst√§rkt sein Aussehen, indem er es nicht in seiner urspr√ºnglichen Tonalit√§t zitiert, sondern im Schl√ºssel seines heldenhaften Triumphes am Schluss der Symphonie.	[76, 70, 63]	69.6667	[-0.4247618509526743, -1.8340681000728447, -1.0848726259634645]	-1.11457e+16	-0.351394385099411
1930	Philip Rabinowitz, 104, South African fastest centenarian over 100 metres, complications of a stroke.	Philip Rabinowitz, 104, S√ºdafrika schnellster Hundertj√§hriger √ºber 100 Meter, Komplikationen eines Schlaganfalls.	[70, 73, 66]	69.6667	[-2.542529447194751, -0.7100200690414104, -0.8875311764118344]	-1380026897549330	-0.246781125664711
2011	administering medications, assessing, venepuncture, wound care and other clinical duties).	Verabreichung von Medikamenten, Bewertung, Venepunktur, Wundversorgung und andere klinische Aufgaben).	[66, 73, 70]	69.6667	[-0.9747158921910012, -0.7100200690414104, -2.542529447194751]	-1.40909e+16	-0.2952001690864563
2589	Anglican devotions Anglican Service Book Prayer Book Rebellion Prayer Book Society of Canada The Books of Homilies	Anglikanische Andacht Anglikanische Gottesdienst Buch Gebetsaufstand Gebetsgesellschaft von Kanada B√ºcher der Homilien	[80, 73, 56]	69.6667	[-0.9392014633651773, -0.7100200690414104, -2.3451914405497267]	-1331470990985430	-0.38925620913505554
2668	Limbaugh later discouraged efforts to impeach Barack Obama as politically unrealistic.	Limbaugh entmutigte sp√§ter die Bem√ºhungen, Barack Obama als politisch unrealistisch zu verklagen.	[100, 72, 99, 50, 47, 50]	69.6667	[0.2654514735602496, -0.8051061417376557, 0.7610451463793909, -0.89218775095613, -0.9892134047422928, -0.7040996644808922]	-0.39401839032955505	-0.33834192156791687
2684	Despite Tasmania losing four quick wickets, they won with four wickets in hand.	Trotz Tasmanien verlieren vier schnelle Pforten, gewann sie mit vier Pforten in der Hand.	[74, 65, 70]	69.6667	[-0.6270457621312975, -2.2815014184266786, -2.542529447194751]	-1.81703e+16	-0.3140980005264282
2799	Authors wrote biographies about revolutionaries like Lenin and Pavlik Morozov.	Die Autoren schrieben Biographien √ºber Revolution√§re wie Lenin und Pawlik Morosow.	[70, 74, 65]	69.6667	[-2.542529447194751, -0.27396814399966013, -2.0531455465314647]	-1.62321e+16	-0.21393375098705292
3428	Impressionism, Art Nouveau, Symbolism, Fauvism, Cubism and Art Deco movements all evolved in Paris.	Impressionismus, Jugendstil, Symbolismus, Fauvismus, Kubismus und Art Deco Bewegungen entstanden in Paris.	[70, 70, 69]	69.6667	[-2.542529447194751, -1.2608678885313718, -0.6501606411289255]	-1.48452e+16	-0.19415178894996643
3474	The teacher says Holocaust, the pupils say it‚Äôs all bullshit...It‚Äôs always the Jews‚Äô fault.	Der Lehrer sagt Holocaust, die Sch√ºler sagen, dass es alle bullshit... It Gefs immer die Juden schuldig.	[72, 70, 67]	69.6667	[-1.6550947727313112, -0.6858367682838149, -1.2805365052188824]	-1.20716e+16	-0.7881722450256348
3704	She campaigns against the discrimination towards noughts.	Sie setzt sich gegen die Diskriminierung von Noughts ein.	[70, 62, 77]	69.6667	[-1.8340681000728447, -0.5038338484022691, -0.6127649914292829]	-0.983555646634799	-0.4110359847545624
4829	In Stillwater, Raven Creek empties into the creek from the northeast, 18.62 mi above the mouth.	In Stillwater leert sich Raven Creek aus Nordosten in den Bach, 18.62 mi √ºber der M√ºndung.	[70, 70, 69]	69.6667	[-2.542529447194751, -1.2608678885313718, -1.3886564302001447]	-1.73068e+16	-0.3236265182495117
4914	Merton approached his new writing assignment with the same fervor and zeal he displayed in the farmyard.	Merton n√§herte sich seinem neuen Schriftauftrag mit dem gleichen Eifer und Eifer, den er auf dem Hof zeigte.	[70, 72, 67]	69.6667	[-2.542529447194751, -0.9439568253313346, -1.10782153212362]	-1.53144e+16	-0.39795875549316406
5111	In the desperation to find Hannah, Mehitable's Aunt Suzy suggested that Mrs. Lamb whip Mehitable into telling.	In der Verzweiflung Hannah zu finden, schlug Mehitable Tante Suzy vor, dass Frau Lamm Mehitable zu erz√§hlen.	[70, 69, 70]	69.6667	[-2.542529447194751, -1.4193234201313905, -1.8340681000728447]	-1931973655799660	-0.25239238142967224
5979	In late 1947 and early 1948, MacArthur received several Republican grandees in Tokyo.	Ende 1947 und Anfang 1948 erhielt MacArthur mehrere republikanische Granden in Tokio.	[70, 75, 64]	69.6667	[-1.8340681000728447, -0.3803415485582847, -1.5657947233076184]	-1.26007e+16	-0.19834300875663757
6096	History of ethnoracial admixture and attitudes towards miscegenation	Geschichte der ethnorakalen Beimischung und Einstellung zur Miscegenation	[70, 75, 64]	69.6667	[-1.8340681000728447, -0.3803415485582847, -1.5657947233076184]	-1.26007e+16	-0.437671959400177
6109	Often billed as "America's Number One Song Stylist", his other nicknames include "Mr.	Oft als "America 's Number One Song Stylist" abgerechnet, geh√∂ren seine anderen Spitznamen "Mr.	[70, 75, 64]	69.6667	[-2.542529447194751, -0.5198479236489196, -1.3517665399881071]	-1.47138e+16	-0.34412267804145813
6198	They wrestle over the gun, which inadvertently discharges.	Sie ringen um die Waffe, die sich versehentlich entl√§dt.	[70, 78, 61]	69.6667	[-1.8340681000728447, -0.1970444167229666, -1.8510529413963546]	-1.29406e+16	-0.44770196080207825
6447	Beyond depths of 4.5 ft but less than 7 ft, Illinois pondweed, Vallisneria, and Sago pondweed tend to be the dominant plants.	Jenseits Tiefen von 4,5 ft, aber weniger als 7 ft, Illinois Pondweed, Vallisneria und Sago Pondweed sind in der Regel die dominierenden Pflanzen.	[70, 72, 67]	69.6667	[-2.542529447194751, -0.9439568253313346, -1.8345317446803386]	-1.77367e+16	-0.279830664396286
6494	We will therefore denote this threshold by windfall revenue.	Daher werden wir diese Schwelle mit Windfall-Einnahmen bezeichnen.	[70, 72, 67]	69.6667	[-2.542529447194751, -0.9439568253313346, -0.7693567586692285]	-1418614343731770	-0.566985547542572
6997	Disco was criticized as mindless, consumerist, overproduced and escapist.	Disco wurde als geistlos, konsumistisch, √ºberproduziert und entflohen kritisiert.	[63, 76, 70]	69.6667	[-1.0548174111253639, -0.4247618509526743, -1.8340681000728447]	-1104549120716960	-0.3001733720302582
5099	The hostess, dressed in yellow, brandishes a cigarette holder as if posing for an advertisement.	Die Gastgeberin, gelb gekleidet, schm√ºckt einen Zigarettenhalter, als ob sie f√ºr eine Werbung posiert.	[100, 99, 85, 50, 55, 30]	69.8333	[0.2654514735602496, 0.7610451463793909, 0.4310128033135338, -0.89218775095613, -0.6565066771919604, -1.4252241913153814]	-0.2527348660350495	-0.5458022952079773
6216	Galvatron II would go on to usurp Megatron's leadership of the Decepticons, demoting his counterpart to guarding a subterranean headquarters.	Galvatron II w√ºrde weiter Megatrons F√ºhrung der Decepticons an sich rei√üen und sein Gegenst√ºck zur Bewachung eines unterirdischen Hauptquartiers demotieren.	[100, 78, 92, 60, 34, 55]	69.8333	[0.2654514735602496, -0.23458970556018363, 0.1346385006840237, -0.48942638043467374, -1.5298618370115828, -0.5238185327722701]	-0.3962677469224061	-0.2987259328365326
9	After that, Chinese junks came to northern Borneo with cargoes of spices, bird nests, shark fins, camphor, rattan and pearls.	Danach kamen chinesische Junks mit Gew√ºrzen, Vogelnestern, Haiflossen, Kampfer, Rattan und Perlen in den Norden von Borneo.	[59, 66, 85]	70	[-1.305435251280939, -0.1591817582022236, -0.4917681450113435]	-0.6521283848315022	-0.31130683422088623
20	He ruled oppressively and nearly bankrupted Mali with his lavish spending.	Er regierte unterdr√ºckerisch und fast bankrott Mali mit seinen verschwenderischen Ausgaben.	[57, 68, 85]	70	[-1.4157165639396765, -0.05850269745893685, -0.4917681450113435]	-0.6553291354699856	-0.4167303442955017
44	However the continued harsh enserfment of peasantry by Polish nobility and especially the suppression of the Orthodox Church alienated the Cossacks.	Doch die anhaltende harte Knechtschaft der Bauern durch den polnischen Adel und vor allem die Unterdr√ºckung der orthodoxen Kirche entfremdeten die Kosaken.	[61, 79, 70]	70	[-2.6394480731097456, -0.13950363286393827, -1.0106889021917267]	-1.26321e+16	-0.42813023924827576
248	The ligament and byssus, if calcified, are composed of aragonite.	Das Ligament und der Byssus bestehen, wenn sie verkalkt sind, aus Aragonit.	[84, 55, 71]	70	[0.33592673061728845, -2.8653489536933385, -1.1024123569313533]	-1.21061e+16	-0.3907372057437897
313	Cotton attempted to downplay the appearance of colonial discord when communicating with his brethren in England.	Baumwolle versuchte, das Erscheinungsbild kolonialer Zwietracht herunterzuspielen, wenn sie mit seinen Br√ºdern in England kommunizierte.	[60, 80, 70]	70	[-2.3288273623118854, 0.323687427468814, -2.542529447194751]	-1.51589e+16	-0.39674538373947144
1113	Happily Ever After featured Lauren Roselli on lead vocals, and a lyric about counting each of twelve tears after a breakup.	Happily Ever After beinhaltete Lauren Roselli als Lead Vocals und eine Lyrik √ºber das Z√§hlen von je zw√∂lf Tr√§nen nach einer Trennung.	[70, 72, 68]	70	[-2.542529447194751, -0.8051061417376557, -1.1243814481238537]	-149067234568542	-0.4459839463233948
1185	Morris was overlooked for the captaincy and then briefly dropped as his cricketing prowess waned.	Morris wurde f√ºr die Kapit√§ne √ºbersehen und fiel dann kurz, als seine Kriechkraft abnahm.	[82, 65, 63]	70	[0.14575458522479776, -2.2815014184266786, -1.4086128129541706]	-1.18145e+16	-0.44147753715515137
1830	Dominant wildlife consists of coyotes, hares, rabbits, foxes and deer, with some reptiles such as rattlesnakes and coral snakes.	Dominante Tierwelt besteht aus Kojoten, Hasen, Kaninchen, F√ºchsen und Hirschen, mit einigen Reptilien wie Rasselkuchen und Korallenschlangen.	[66, 74, 70]	70	[-1.1972574296797975, -0.614933996345165, -1.8340681000728447]	-1.21542e+16	-0.2408875674009323
1912	In Series 3, the Limbo Challenge and Ultimate Jeopardy became The Eliminator and Double Jeopardy, respectively.	In Serie 3 wurden die Limbo Challenge und Ultimate Jeopardy The Eliminator bzw. Double Jeopardy.	[70, 63, 77]	70	[-2.542529447194751, -2.460474745768212, -0.15167916733124173]	-1718227786764730	-0.23535944521427155
2048	Sulfur inlays were particularly popular in the late 18th and early 19th centuries, notably amongst Pennsylvania German cabinetmakers.	Besonders beliebt waren die Schwefeleinlagen im sp√§ten 18. und fr√ºhen 19. Jahrhundert, vor allem bei den deutschen Schreinern Pennsylvania.	[70, 71, 69]	70	[-2.542529447194751, -1.1024123569313533, -0.9444804263170459]	-1.52981e+16	-0.5377735495567322
2268	The largest of these is the Borneo Orangutan Survival Foundation, founded by conservationist Willie Smits.	Die gr√∂√üte davon ist die Borneo Orang Utan Survival Foundation, die vom Konservator Willie Smits gegr√ºndet wurde.	[70, 79, 61]	70	[-2.542529447194751, -0.13950363286393827, -1.5223053588862974]	-1.40145e+16	-0.29574620723724365
2472	He then roqueted off Janzen, used two shots to pass through the final wicket, roqueted off Chauhan, and closed in on the stake.	Dann roqueted er Janzen ab, benutzte zwei Sch√ºsse, um durch die endg√ºltige Docht zu gehen, roqueted weg von Chauhan, und schloss in auf dem Scheiterhaufen.	[100, 100, 100, 35, 55, 30]	70	[0.2654514735602496, 0.8505318100501577, 0.37321150863630664, -1.4963298067383144, -0.6565066771919604, -1.4252241913153814]	-0.348144313833157	-0.4773871898651123
2694	Ripley shoots it with a grappling hook, but the gun catches as the airlock door closes, tethering the alien to the shuttle.	Ripley schie√üt es mit einem Greifhaken, aber die Waffe f√§ngt, wie die Luftverriegelung T√ºr schlie√üt, die Bindung der Alien an das Shuttle.	[70, 78, 62]	70	[-2.542529447194751, 0.6177824849607275, -2.549961409438979]	-1491569457224330	-0.4901297390460968
2847	Texas cattle ranchers considered that quote tantamount to defamation, and promptly sued her for libel.	Texas Viehz√ºchter betrachteten, dass Zitat gleichbedeutend mit Verleumdung, und verklagte sie prompt f√ºr Verleumdung.	[66, 72, 72]	70	[-1.6850014526541417, -0.9439568253313346, -0.719843458479854]	-1.11627e+16	-0.33159735798835754
3026	Four fragmentary crosses from the Isle of Man, from Kirk Andreas, Malew, Jurby, and Maughold depict Sigurd stabbing Fafnir from underneath.	Vier fragmentarische Kreuze von der Isle of Man, von Kirk Andreas, Malew, Jurby und Maughold zeigen Sigurd, wie er Fafnir von unten stach.	[70, 67, 73]	70	[-2.542529447194751, -1.7362344833314276, -0.49690580123975703]	-1.59189e+16	-0.3118448555469513
3336	On April 25, recalled RHP Louis Coleman from the bereavement list and optioned LHP Luis Avil√°n to AAA Oklahoma City.	Am 25. April erinnerte RHP Louis Coleman von der Trauerliste und entschied sich f√ºr LHP Luis Avil√°n AAA Oklahoma City.	[61, 79, 70]	70	[-1.3462443712772572, -0.13950363286393827, -2.542529447194751]	-1.34276e+16	-0.2307673692703247
3485	Regional Command West consisting of Badghis, Farah, Ghor, and Herat Provinces.	Regional Command West bestehend aus Badghis, Farah, Ghor und Herat Provinzen.	[70, 76, 64]	70	[-2.542529447194751, -0.31013469893126033, -2.3709880820974454]	-1.74122e+16	-0.18370507657527924
3902	Throughout the 16th to 18th centuries, many of the szlachta mistreated peasantry, townsfolk and Jews.	W√§hrend des 16. bis 18. Jahrhunderts misshandelten viele der szlachta Bauern, Stadtbewohner und Juden.	[70, 78, 62]	70	[-2.542529447194751, -0.23458970556018363, -1.465459085920234]	-1414192746225050	-0.26879096031188965
4072	The integument becomes a seed coat, and the ovule develops into a seed.	Der Integument wird zu einem Samenmantel, und das Eulen entwickelt sich zu einem Samen.	[100, 81, 78, 50, 66, 45]	70	[0.2654514735602496, 0.05066851252855241, -1.1181747907067108, -0.89218775095613, -0.19903492681025348, -0.8843807961895145]	-0.46294304642896783	-0.5341688990592957
4338	The player buys some small balls which he throws as hard as he can at coconuts balanced on sticks.	Der Spieler kauft einige kleine Kugeln, die er wirft so hart wie er kann bei Kokosn√ºssen auf Sticks ausgeglichen.	[100, 100, 100, 35, 50, 35]	70	[0.2654514735602496, 0.8505318100501577, 0.37321150863630664, -1.4963298067383144, -0.8644483819109182, -1.244943059606759]	-0.3527544093348796	-0.3235643208026886
4497	The Runaways eventually unite with the Young Avengers to assist against the invading Skrulls.	Die Runaways vereinen sich schlie√ülich mit den Jungen R√§chen, um gegen die eindringenden Skrulls zu helfen.	[70, 80, 60]	70	[-2.542529447194751, 0.323687427468814, -1.67951540244663]	-1.29945e+16	-0.34212613105773926
4875	After the Armistice of 22 June 1940, the Luftwaffe settled into airfields along the French, Belgian and Dutch coasts.	Nach dem Waffenstillstand vom 22. Juni 1940 lie√ü sich die Luftwaffe an der franz√∂sischen, belgischen und niederl√§ndischen K√ºste auf Flugpl√§tzen nieder.	[70, 71, 69]	70	[-2.542529447194751, -1.1024123569313533, -0.6501606411289255]	-1.4317e+16	-0.23365047574043274
5410	She replaced the ironclad as the Squadron flagship on 16 November, under the command of Vizeadmiral Hans von Koester.	Am 16. November ersetzte sie unter dem Kommando von VizeAdmiral Hans von Koester das Flaggschiff der Geschwader.	[70, 62, 78]	70	[-2.542529447194751, -2.5285121413315204, -0.23458970556018363]	-1768543764695480	-0.4704536199569702
6078	Now principally remembered for his Western explorations.	Jetzt vor allem f√ºr seine westlichen Erkundungen in Erinnerung.	[70, 79, 61]	70	[-1.8340681000728447, -0.1359453727778606, -1.8510529413963546]	-127368880474902	-0.48954057693481445
6084	Macedonski's language alternated neologisms with barbarisms, many of which were coined by him personally.	Mazedoniens Sprache wechselte Neologismen mit Barbarei, von denen viele von ihm pers√∂nlich gepr√§gt wurden.	[70, 65, 75]	70	[-1.8340681000728447, -0.9913319880093451, -0.5198479236489196]	-1.11508e+16	-0.21443574130535126
6383	Next, Naiad and captured a French brig from the Straits and a Dutch sloop, also from the Straits, carrying drugs and medicines.	Als n√§chstes eroberte Naiad eine franz√∂sische Brig aus der Meerenge und einem holl√§ndischen Schleuder, auch aus der Meerenge, mit Medikamenten und Medikamenten.	[70, 78, 62]	70	[-2.542529447194751, 0.006776364268776851, -2.806759186582424]	-1.78084e+16	-0.5051619410514832
6487	In both 2008 and 2009, UCF was ranked in the top ten in Intellectual Property Today's Patent Scorecard.	Sowohl 2008 als auch 2009 rangierte UCF in der heutigen Patentanzeiger unter den Top Ten.	[100, 93, 73, 66, 48, 40]	70	[0.2654514735602496, 0.22412516435479046, -0.7100200690414104, -0.24776955812179996, -0.9476250637985012, -1.0646619278981369]	-0.41341666349080136	-0.5732893943786621
6618	The average shooter can engage multiple targets faster than with a handgun.	Der durchschnittliche Shooter kann mehrere Ziele schneller als mit einer Waffe engagieren.	[80, 60, 70]	70	[-0.04441756016769294, -2.3288273623118854, -1.2608678885313718]	-121137093700365	-0.30480819940567017
505	While tracking Mystique, she stumbles onto prophetic diaries that belonged to Irene Adler, a precognitive.	W√§hrend sie Mystique verfolgt, stolpert sie auf prophetische Tageb√ºcher, die Irene Adler geh√∂rten, einer Pr√§kognitiven.	[100, 81, 81, 60, 54, 45]	70.1667	[0.2654514735602496, -1.2167738389730587, 0.05066851252855241, -0.48942638043467374, -0.698095018135752, -0.8843807961895145]	-0.4954260079406995	-0.33403465151786804
2713	Some planted the gardens, plowed and harrowed, harvested crops, and even laid tiles for drainage.	Einige pflanzten die G√§rten, pfl√ºgten und harrotierten, ernteten Ernten und legten sogar Fliesen f√ºr die Entw√§sserung.	[100, 100, 92, 50, 34, 45]	70.1667	[0.2654514735602496, 0.37321150863630664, 1.0966153121872513, -0.89218775095613, -1.5298618370115828, -0.8843807961895145]	-0.2618586816289033	-0.447665810585022
4834	Roughening of the serosal surface of the intestine can occur secondary to peritonitis.	Roughening der serosalen Oberfl√§che des Darms kann sekund√§r zu Peritonitis auftreten.	[86, 100, 93, 50, 60, 32]	70.1667	[0.5260988760097791, 0.2654514735602496, 0.22412516435479046, -0.89218775095613, -0.44856497247300275, -1.3531117386319325]	-0.2796981580227077	-0.359805703163147
1211	Policemen also beat passersby, smashed shop windows, and raided two caf√©s, detonating a grenade in one of them.	Auch Polizisten schlugen Passanten, zerschlugen Schaufenster und durchsuchten zwei Caf√©s und z√ºndeten in einem von ihnen eine Granate.	[65, 75, 71]	70.3333	[-1.7923057709304324, -0.4685902305312789, -0.9427811157199508]	-1.06789e+16	-0.4063485562801361
4401	He might borrow from it, but repaid like other borrowers.	Er k√∂nnte daraus borgen, aber wie andere Kreditnehmer zur√ºckgezahlt.	[67, 72, 72]	70.3333	[-1.5776971343778512, -0.9439568253313346, -0.719843458479854]	-1.0805e+16	-0.5348485708236694
5387	She taunted Charlotte to jump or else she'd push her.	Sie verh√∂hnte Charlotte, um zu springen, sonst w√ºrde sie sie dr√ºcken.	[55, 78, 78]	70.3333	[-2.8653489536933385, 0.006776364268776851, 0.6177824849607275]	-0.7469300348212781	-0.4269849359989166
6006	To ensure complete radio intercept coverage, OKW/Chi ordered its outstation at Lauf an der Pegnitz also to intercept the traffic.	Um eine vollst√§ndige Funkabh√∂rabdeckung zu gew√§hrleisten, bestellte OKW / Chi seine Au√üenstation bei Lauf an der Pegnitz auch, um den Verkehr abzufangen.	[79, 71, 61]	70.3333	[-1.028688127035944, -0.6247377243387089, -1.8510529413963546]	-1.16816e+16	-0.41549983620643616
6683	The hemolymph of the mealworm beetle Tenebrio molitor contains several antifreeze proteins.	Die H√§molymphe des Mealworm Beetle Tenebrio molitor enth√§lt mehrere Frostschutzproteine.	[57, 74, 80]	70.3333	[-1.6434671545462618, -0.27396814399966013, 0.323687427468814]	-0.531249290359036	-0.18233729898929596
6825	Exhumations may also occur as part of grave robbing, or as an act of desecration to show disrespect.	Exhumationen k√∂nnen auch als Teil von Grabraub oder als Akt der Entweihung auftreten, um Missachtung zu zeigen.	[64, 75, 72]	70.3333	[-1.1233272838255035, -0.05103048675956321, -0.9439568253313346]	-0.7061048653054671	-0.4319625794887543
3815	The mask then proceeds to devolve him back into a Toa Mata.	Die Maske devolviert ihn dann wieder in eine Toa Mata.	[100, 89, 78, 51, 55, 50]	70.5	[0.2654514735602496, -0.13382149032827656, -0.23458970556018363, -0.8519116139039844, -0.6565066771919604, -0.7040996644808922]	-0.38591294631750794	-0.4900818467140198
226	In February 1944, Washington crushed its bow in a collision with battleship .	Im Februar 1944 zerschlug Washington seinen Bogen in einer Kollision mit dem Schlachtschiff.	[62, 79, 71]	70.6667	[-2.1142187257593044, 0.16523189586879544, -2.4489300831695844]	-1.46597e+16	-0.39557236433029175
1632	Before the extinction of the thylacine, the Tasmanian devil ate thylacine joeys left alone in dens when their parents were away.	Vor dem Aussterben des Thylacins a√ü der tasmanische Teufel Thylacin-Freuden, die allein in H√∂hlen gelassen wurden, als ihre Eltern weg waren.	[85, 68, 59]	70.6667	[-0.4917681450113435, -1.1854504325226372, -1.305435251280939]	-0.9942179429383066	-0.33573970198631287
1853	The 15,000 fans in attendance greeted his decision with loud boos and catcalls.	Die 15.000 anwesenden Fans begr√º√üten seine Entscheidung mit lauten Boos und Catcalls.	[100, 100, 80, 51, 48, 45]	70.6667	[0.2654514735602496, 0.8505318100501577, -0.04441756016769294, -0.8519116139039844, -0.9476250637985012, -0.8843807961895145]	-0.26872529174154763	-0.4154486656188965
1983	Gilles de Berlaymont, lord of Hierges, the last royalist stadtholder of Holland, captured and sacked Schoonhoven, and Oudewater in August 1575.	Gilles de Berlaymont, Herr von Hierges, der letzte k√∂nigliche Stadthalter Hollands, eroberte und entlie√ü Schoonhoven und Oudewater im August 1575.	[73, 71, 68]	70.6667	[-2.261731355119251, -0.9001922144339011, -0.7760070199361482]	-1.31264e+16	-0.2397826611995697
2055	Without warning, Mystique ambushed Sinister and shoved his face onto Rogue's.	Ohne Vorwarnung, Mystique Hinterhalt Sinister und schob sein Gesicht auf Rogue.	[71, 68, 73]	70.6667	[-2.4489300831695844, -1.577778951731409, -0.7100200690414104]	-1.57891e+16	-0.44567573070526123
2425	When necessary, mobsters would either point to their chins or make a "C" with thumb and forefinger when referring to him.	Wenn n√∂tig, wiesen Mobster entweder auf ihr Kinn oder machten ein "C" mit Daumen und Zeigefinger, wenn sie sich auf ihn bezogen.	[71, 77, 64]	70.6667	[-2.4489300831695844, -0.15167916733124173, -2.3709880820974454]	-1.6572e+16	-0.387282133102417
2439	Detective Tanner later divulges to the Liars that someone dialed Charlotte from the Two Crows diner the night she passed away.	Detektiv Tanner verr√§t sp√§ter den L√ºgnern, dass jemand Charlotte aus dem Two Crows Abendessen in der Nacht, die sie starb gew√§hlt.	[71, 67, 74]	70.6667	[-2.4489300831695844, -1.7362344833314276, -1.4761214453897777]	-1.8871e+16	-0.5357800722122192
2458	The win propelled Notre Dame to the top spot in the polls as they traveled to Ann Arbor for a showdown with the Wolverines.	Der Sieg trieb Notre Dame an die Spitze der Umfragen, als sie nach Ann Arbor reiste f√ºr einen Showdown mit den Wolverines.	[58, 78, 76]	70.6667	[-3.1623342677315947, -0.23458970556018363, 0.1719071704805337]	-1.07501e+16	-0.36671561002731323
2602	Mine Safety and Health Administration; March 9, 2006, "Emergency Mine Evacuation" Federal Register, pp.	Minensicherheit und Gesundheitsschutz; 9. M√§rz 2006, "Notfall-Minenevakuierung" Bundesregister, S.	[71, 75, 66]	70.6667	[-2.4489300831695844, -0.5198479236489196, -0.8875311764118344]	-1.28544e+16	-0.4929088354110718
2883	Canadian nobility in the aristocracy of the United Kingdom	Kanadischer Adel im Adel des Vereinigten K√∂nigreichs	[79, 62, 71]	70.6667	[-0.13950363286393827, -2.1142187257593044, -1.1024123569313533]	-1118711571851530	-0.3765893578529358
2893	Sedombe River starts also at the southern heel of the same kopje.	Sedombe River beginnt auch an der s√ºdlichen Ferse des gleichen kopje.	[71, 83, 58]	70.6667	[-0.9001922144339011, -0.6707414723528771, -1.6928441777844876]	-1.08793e+16	-0.28369322419166565
2910	The lead vampire communicates to his comrades in hisses and growls, ordering them to split up.	Der federf√ºhrende Vampir kommuniziert mit seinen Kameraden in Zischen und Knurren und befahl ihnen, sich zu spalten.	[71, 79, 62]	70.6667	[-2.4489300831695844, -0.13950363286393827, -1.465459085920234]	-1351297600651250	-0.4040873646736145
3915	One of the heroes, Idas, accuses him of cowardice; the prophet Idmon in turn accuses Idas of drunken vainglory.	Einer der Helden, Idas, wirft ihm Feigheit vor; der Prophet Idmon wiederum wirft Idas betrunkenen Geiz vor.	[71, 75, 66]	70.6667	[-1.1024123569313533, -0.5198479236489196, -2.0574694019204354]	-1.22658e+16	-0.2612842917442322
4703	Air raid sirens sounded in Eshkol, Sderot, Hof Ashkelon, Ashdod, Kiryat Malachi and Sha'ar Hanegev.	Luftangriff Sirenen klang in Eshkol, Sderot, Hof Ashkelon, Ashdod, Kiryat Malachi und Sha 'ar Hanegev.	[71, 79, 62]	70.6667	[-2.4489300831695844, -0.13950363286393827, -1.360116755620321]	-1.31618e+16	-0.165056511759758
5211	On December 8, 1941, Japanese bombers struck American airfields on Luzon.	Am 8. Dezember 1941 schlugen japanische Bomber amerikanische Flugpl√§tze auf Luzon.	[62, 76, 74]	70.6667	[-2.1142187257593044, -0.31013469893126033, -0.27396814399966013]	-0.8994405228967416	-0.20867101848125458
6277	The mollusk creates a pearl sac to seal off the irritation.	Die Weichtiere erzeugt einen Perlensack, um die Irritation zu versiegeln.	[63, 73, 76]	70.6667	[-2.0069144074830136, -0.785501293731316, 0.1719071704805337]	-0.8735028435779321	-0.5434550642967224
6370	Stewart Rome ... Dr Alec Portal Trilby Clark ... Mrs Eleanor Appleby Ursula Jeans ... Vera, the Maid Clifford Heatherley ...	Stewart Rome... Dr Alec Portal Trilby Clark... Mrs Eleanor Appleby Ursula Jeans... Vera, the Maid Clifford Heatherley...	[71, 79, 62]	70.6667	[-2.4489300831695844, -0.13950363286393827, -1.465459085920234]	-1351297600651250	-0.08865030109882355
6385	A thriving fortress will attract certain "megabeasts" like hydras, titans or dragons, and randomly generated creatures called "Forgotten Beasts".	Eine florierende Festung wird bestimmte "Megabeasten" wie Hydras, Titanen oder Drachen anziehen und zuf√§llig erzeugte Kreaturen namens "Vergessene Bestien".	[79, 71, 62]	70.6667	[0.16523189586879544, -2.0536082324516722, -1.271938675460006]	-1.05344e+16	-0.3505077362060547
6530	Antiochus IV Epiphanes sacked Jerusalem and looted the Temple in 169 BC after disturbances in Judea during his abortive invasion of Egypt.	Antiochus IV Epiphanes pl√ºnderte Jerusalem und pl√ºnderte den Tempel 169 v. Chr. nach St√∂rungen in Jud√§a w√§hrend seiner abtreibenden Invasion √Ñgyptens.	[100, 93, 84, 51, 61, 35]	70.6667	[0.2654514735602496, 0.22412516435479046, 0.33592673061728845, -0.8519116139039844, -0.4069766315292112, -1.244943059606759]	-0.279721322751271	-0.2900008261203766
6948	Intermarriage and interaction became common among the Acoma, other pueblos, and Hispanic villages.	Interehe und Interaktion wurden bei den Acoma, anderen Pueblos und hispanischen D√∂rfern √ºblich.	[71, 71, 70]	70.6667	[-0.6031874131047453, -0.9427811157199508, -1.2608678885313718]	-0.9356121391186893	-0.48405158519744873
556	After Whitefield preached at St. Philip's, Charleston, the Commissary, Alexander Garden suspended him.	Nachdem Whitefield bei St. Philip 's, Charleston, dem Kommissar, gepredigt hatte, suspendierte ihn Alexander Garden.	[100, 98, 76, 66, 45, 40]	70.8333	[0.2654514735602496, 0.6715584827086242, -0.4247618509526743, -0.24776955812179996, -1.072390086629876, -1.0646619278981369]	-0.31209557788893555	-0.27320629358291626
16	Differences in dimensionalities of phonons and excitons cause upper level to transform into many states of phonon field.	Unterschiede in der Dimensionalit√§t von Phonen und Erregungen bewirken, dass sich die obere Ebene in viele Zust√§nde des Phonon-Feldes verwandelt.	[59, 65, 89]	71	[-1.305435251280939, -0.20952128857386698, -0.13382149032827656]	-0.5495926767276942	-0.41229450702667236
373	Miller then bowled the English skipper Yardley to end England's innings at 496.	Miller bog dann den englischen Skipper Yardley, um Englands Innings bei 496 zu beenden.	[100, 100, 85, 51, 50, 40]	71	[0.2654514735602496, 0.37321150863630664, 0.4310128033135338, -0.8519116139039844, -0.8644483819109182, -1.0646619278981369]	-0.2852243563671582	-0.36999374628067017
776	The makers of Torchwood deliberately portray Cardiff as a modern urban centre, contrasting with past stereotypical portrayals of Wales.	Die Macher von Torchwood stellen Cardiff bewusst als modernes urbanes Zentrum dar, im Gegensatz zu fr√ºheren stereotypen Darstellungen von Wales.	[68, 77, 68]	71	[-0.8261045005564989, 0.3948448277206306, -1.577778951731409]	-0.6696795415224258	-0.3315410614013672
965	There are fall bow and general hunting seasons for elk, pronghorn antelope, whitetail deer and mule deer.	Es gibt Herbstbogen- und allgemeine Jagdzeiten f√ºr Elche, Prunkornantilopen, Wei√üschwanzhirsche und Maultier.	[71, 69, 73]	71	[-2.4489300831695844, -1.4193234201313905, -0.4117684060483194]	-1.42667e+16	-0.39995908737182617
1300	The youngest was "Taxon C", represented by skull MOR 485 and the horned dinosaur fossils of the Blacktail Creek.	Der j√ºngste war "Taxon C", vertreten durch Sch√§del MOR 485 und die geh√∂rnten Dinosaurier Fossilien des Blacktail Creek.	[71, 77, 65]	71	[-2.4489300831695844, -0.5046539516149451, -2.2815014184266786]	-1745028484403730	-0.27540284395217896
1589	After his succession in 1625, Charles quarrelled with the Parliament of England, which sought to curb his royal prerogative.	Nach seiner Nachfolge 1625 stritt Charles mit dem Parlament von England, das versuchte, sein k√∂nigliches Vorrecht zu beschneiden.	[71, 67, 75]	71	[-2.4489300831695844, -0.8317690981739914, -0.4685902305312789]	-1.24976e+16	-0.35459810495376587
1664	The main themes are the extreme weakness, slowness, gauntness, and emaciation of a dystrophic patient.	Die Hauptthemen sind die extreme Schw√§che, Langsamkeit, H√∂flichkeit und Ausma√üe eines dystrophen Patienten.	[81, 75, 57]	71	[-1.5129364429179175, -1.386634781719011, -1.3893898805524227]	-1.42965e+16	-0.4536890685558319
1702	Gnaeus Cornelius L. f. L. n. Lentulus, consul in 201 BC, and subsequently one of the triumvirs appointed to bring new colonists to Narnia.	Gnaeus Cornelius L. f. L. n. Lentulus, Konsul 201 v. Chr., und sp√§ter einer der Triumviren ernannt, um neue Kolonisten nach Narnia zu bringen.	[71, 79, 63]	71	[-2.4489300831695844, 0.8407201422008245, -2.460474745768212]	-1.35623e+16	-0.21598680317401886
1766	In 1904 the Leeds parish absorbed Beeston, Chapel Allerton, Farnley, Headingley cum Burley and Potternewton from within the borough.	1904 absorbierte die Gemeinde Leeds Beeston, Chapel Allerton, Farnley, Headingley cum Burley und Potternewton aus dem Bezirk.	[71, 74, 68]	71	[-2.4489300831695844, -0.614933996345165, -1.577778951731409]	-1.54721e+16	-0.26120689511299133
1992	Maize is the major staple, and farmers surround rows of it with cocoyams, plantains, beans, groundnuts, melons, and yams.	Mais ist das wichtigste Grundnahrungsmittel, und die Bauern umgeben Reihen davon mit Kokos, Kochbohnen, Bohnen, Erdn√ºssen, Melonen und Marmeladen.	[71, 76, 66]	71	[-1.744581436402078, -0.4247618509526743, -1.2380739940559804]	-1.13581e+16	-0.4312378466129303
1994	In the helical thylakoid model, grana consist of a stack of flattened circular granal thylakoids that resemble pancakes.	Im spiralf√∂rmigen Thylakoid-Modell besteht Grana aus einem Stapel abgeflachter kreisf√∂rmiger Thylakoide, die Pfannkuchen √§hneln.	[66, 76, 71]	71	[-0.9747158921910012, 0.1719071704805337, -1.1024123569313533]	-0.6350736928806069	-0.25409364700317383
2634	Open tuning refers to a guitar tuned so that strumming the open strings produces a chord, typically a major chord.	Open Tuning bezieht sich auf eine Gitarre gestimmt, so dass das Schlagen der offenen Saiten erzeugt einen Akkord, in der Regel ein Dur-Akkord.	[75, 67, 71]	71	[-0.5198479236489196, -2.102528091085145, -0.9538426292256633]	-1.19207e+16	-0.36206406354904175
2834	The U.S. provided France with 269,644 M1 and M2 carbines from World War II to 1963.	Die USA versorgten Frankreich mit 269.644 M1- und M2-Karbinen vom Zweiten Weltkrieg bis 1963.	[66, 76, 71]	71	[-0.8875311764118344, -0.4247618509526743, -1.744581436402078]	-1.01896e+16	-0.30294114351272583
2904	A juvenile keeps its forelimbs pressed to the side of its carapace, and propels itself by kicking with its hind limbs.	Ein Jugendlicher h√§lt seine Vorderbeine an die Seite seines Karapaises gedr√ºckt und treibt sich durch Treten mit seinen Hinterbeinen an.	[71, 68, 74]	71	[-2.4489300831695844, -1.577778951731409, -0.614933996345165]	-1.54721e+16	-0.5753018856048584
3816	The Little Ice Age spelt the death knell of northern viticulture.	Die Kleine Eiszeit schrieb den Todesknick des n√∂rdlichen Weinbaus.	[71, 75, 67]	71	[-2.4489300831695844, -0.4685902305312789, -1.8345317446803386]	-1584017352793730	-0.6212399005889893
3822	At each halt, he would regale us [his entourage] rare foods and confectionery.	Bei jedem Halt w√ºrde er uns [sein Gefolge] seltene Lebensmittel und S√º√üwaren zur√ºckgeben.	[71, 75, 67]	71	[-2.4489300831695844, -0.5198479236489196, -1.181227721089917]	-1.38334e+16	-0.4238361418247223
4182	She wears a peplos and her coat hangs from her left arm.	Sie tr√§gt einen Peplos und ihr Mantel h√§ngt von ihrem linken Arm.	[72, 59, 82]	71	[-0.8051061417376557, -2.436131680588176, 0.6405984906688512]	-0.8668797772189936	-0.28926292061805725
4415	Orange colored dichromate has photosensitivity when it is mixed with colloids such as gum arabic, albumen, or gelatin.	Orangenfarbiges Dichromat hat Lichtempfindlichkeit, wenn es mit Kolloiden wie Gummi arabisch, Albumen oder Gelatine vermischt wird.	[81, 62, 70]	71	[0.4821429590688326, -1.755966868700109, -1.1657187729600478]	-0.813180894197108	-0.2921771705150604
4496	Of these a greater proportion were Flemish rather than Walloon Belgians and sympathised with the plight of the Hutu.	Von diesen waren mehr Fl√§mische als Wallonische Belgier und sympathisierten mit der Notlage der Hutu.	[100, 100, 74, 60, 47, 45]	71	[0.2654514735602496, 0.37321150863630664, -0.614933996345165, -0.48942638043467374, -0.9892134047422928, -0.8843807961895145]	-0.3898819325858483	-0.37200671434402466
5072	Wolves typically kill moose by tearing at their haunches and perineum, causing massive blood loss.	W√∂lfe t√∂ten Elche in der Regel durch Risse an ihren Haunches und Perineum, was zu massiven Blutverlust.	[66, 71, 76]	71	[-2.192014754755912, -0.6247377243387089, -0.4247618509526743]	-1.0805e+16	-0.3974176049232483
5230	The Confederates began bombarding the Union troops on the flat lands, with Ewell himself gleefully manning one of the cannons.	Die Konf√∂derierten begannen, die Unionstruppen auf das flache Land zu bombardieren, wobei Ewell selbst eine der Kanonen freudig besetzte.	[70, 73, 70]	71	[-0.6774931089219965, -0.49690580123975703, -1.2608678885313718]	-0.8117555995643752	-0.4337465465068817
5334	During the Third War, they served as the Lich King's jailors, on the behest of Kil'jaeden, and commanded the Plague that swept through Lordaeron.	W√§hrend des dritten Krieges dienten sie auf Gehei√ü von Kil 'jaeden als Gef√§ngnisw√§rter des Lichk√∂nigs und befahlen der Pest, die Lordaeron durchquerte.	[82, 55, 76]	71	[0.6405984906688512, -3.3925432620174534, -0.23165893401848944]	-0.9945345684556973	-0.27110257744789124
6101	Subsequently, in 1902, he enrolled in Fergusson College, in Pune.	Anschlie√üend, 1902, schrieb er sich in Fergusson College, in Pune.	[71, 76, 66]	71	[-1.744581436402078, -0.31924250461317866, -1.3756225779151277]	-1.14648e+16	-0.3507590591907501
6149	between close relatives‚Äîsometimes a second cousin but usually a first cousin.	zwischen nahen Verwandten manchmal ein zweiter Cousin, aber in der Regel ein erster Cousin.	[100, 93, 73, 70, 45, 45]	71	[0.2654514735602496, 0.22412516435479046, -0.7100200690414104, -0.08666500991321746, -1.072390086629876, -0.8843807961895145]	-0.377313220643163	-0.4364115595817566
6577	As Clarence, Robey dressed in a top hat and frock coat and carried a malacca cane, the garb of a stereotypical Victorian gentleman.	Als Clarence, Robey in einem Hut und Frock Mantel gekleidet und trug einen Malakka Stock, das Gewand eines stereotypen viktorianischen Gentleman.	[71, 75, 67]	71	[-2.4489300831695844, -0.4685902305312789, -2.102528091085145]	-1.67335e+16	-0.26321953535079956
6665	Malaysia Day on 16 September commemorates federation in 1963.	Malaysia Day am 16. September gedenkt F√∂deration 1963.	[71, 78, 64]	71	[-2.4489300831695844, 0.6177824849607275, -2.3709880820974454]	-1.40071e+16	-0.3443777561187744
3097	Sometimes Francks would portray a secondary M.A.D.	Manchmal Francks w√ºrde eine sekund√§re M.A.D. darstellen	[100, 100, 79, 53, 45, 50]	71.1667	[0.2654514735602496, 0.8505318100501577, -0.13950363286393827, -0.7713593397996931, -1.072390086629876, -0.7040996644808922]	-0.2618949066939987	-0.2585962414741516
4333	Various types of copper flashings and copings exist.	Es gibt verschiedene Arten von Kupferblitzen und -kopien.	[100, 87, 92, 40, 48, 60]	71.1667	[0.2654514735602496, 0.6211849487060245, 0.1346385006840237, -1.2949491214775863, -0.9476250637985012, -0.3435374010636478]	-0.26080611056490627	-0.43879714608192444
4564	Cole Hamels gave up three runs in six innings while the bullpen surrendered three more runs.	Cole Hamels gab drei L√§ufe in sechs Innings auf, w√§hrend der Stift drei weitere L√§ufe abgab.	[100, 100, 82, 45, 50, 50]	71.1667	[0.2654514735602496, 0.8505318100501577, 0.14575458522479776, -1.093568436216858, -0.8644483819109182, -0.7040996644808922]	-0.23339643562891058	-0.4455181360244751
4966	Many of the reptiles and amphibians inhabit the perimeter of Lake Norman.	Viele Reptilien und Amphibien bewohnen den Normannensee.	[100, 99, 73, 55, 41, 59]	71.1667	[0.2654514735602496, 0.7610451463793909, -0.7100200690414104, -0.6908070656954018, -1.238743450405042, -0.3795936274053722]	-0.3321112654345976	-0.35498666763305664
1037	The battalion then cleared Sanananda Point and east to the Giruwa River before nightfall.	Das Bataillon l√∂schte dann Sanananda Point und √∂stlich zum Giruwa River vor Einbruch der Dunkelheit.	[69, 72, 73]	71.3333	[-1.0903643598263917, -0.719843458479854, -0.785501293731316]	-0.8652363706791872	-0.39468151330947876
1074	In Finnish Lapland, the Soviet 88th and 122nd Rifle Divisions attacked at Salla.	In Finnisch Lappland griffen die sowjetischen 88. und 122. Gewehre in Salla an.	[100, 86, 100, 54, 58, 30]	71.3333	[0.2654514735602496, 0.5260988760097791, 0.8505318100501577, -0.7310832027475475, -0.5317416543605858, -1.4252241913153814]	-0.17432781480055473	-0.35983404517173767
2861	Blindfold, during an evening of storytelling, relayed the history of the deceased New Mutant Illyana Rasputin to her classmates.	Blindfold, w√§hrend eines Abends des Geschichtenerz√§hlens, gab die Geschichte der verstorbenen New Mutant Illyana Rasputin an ihre Klassenkameraden weiter.	[66, 71, 77]	71.3333	[-1.6850014526541417, -1.1024123569313533, 0.3948448277206306]	-0.7975229939549547	-0.29040926694869995
2925	Sea urchins graze on the lower stems of kelp, causing the kelp to drift away and die.	Seeigel weiden auf den unteren St√§ngeln des Kelp, so dass der Kelp abdriften und sterben.	[65, 72, 77]	71.3333	[-1.7923057709304324, -0.9439568253313346, 0.3948448277206306]	-0.7804725895137121	-0.41648900508880615
4017	He exhibits both Superman's abilities as well as Superboy's tactile telekinesis.	Er zeigt sowohl Superman 's F√§higkeiten als auch Superboy' s taktile Telekinese.	[100, 79, 78, 68, 48, 55]	71.3333	[0.2654514735602496, -1.3841407176687814, -0.23458970556018363, -0.1672172840175087, -0.9476250637985012, -0.5238185327722701]	-0.4986566383761659	-0.2682674825191498
2410	Benny's knees dropped, but he clutched Townsend around the waist, whispered into his ear, and clutched long enough to recover.	Bennys Knie fielen, aber er klammerte Townsend um die Taille, fl√ºsterte ihm ins Ohr und klammerte sich lange genug, um sich zu erholen.	[100, 79, 97, 51, 42, 60]	71.5	[0.2654514735602496, -0.13950363286393827, 0.5820718190378574, -0.8519116139039844, -1.1971551094612505, -0.3435374010636478]	-0.28076407744911897	-0.3009382486343384
4115	He defeated Jarkko Nieminen and Australian qualifier Matthew Ebden, but he lost to Andy Roddick in the quarterfinals.	Er besiegte Jarkko Nieminen und den australischen Qualifier Matthew Ebden, verlor jedoch Andy Roddick im Viertelfinale.	[100, 84, 92, 47, 46, 60]	71.5	[0.2654514735602496, 0.33592673061728845, 0.1346385006840237, -1.0130161621125668, -1.0308017456860843, -0.3435374010636478]	-0.2752231006667895	-0.2081734538078308
4595	Di·ªám promptly reneged on his promises, and intensified his authoritarian rule and crackdowns on dissidents.	Er verzichtete sofort auf seine Versprechen und versch√§rfte seine autorit√§re Herrschaft und das Vorgehen gegen Dissidenten.	[100, 91, 80, 60, 49, 49]	71.5	[0.2654514735602496, 0.04515183701325695, -0.04441756016769294, -0.48942638043467374, -0.9060367228547097, -0.7401558908226167]	-0.3115722072843644	-0.7055675387382507
106	An enraged Gordon barely restrains himself from killing Joker, shooting the Joker's knee instead.	Ein w√ºtender Gordon h√§lt sich kaum davon ab, Joker zu t√∂ten und stattdessen auf das Knie des Jokers zu schie√üen.	[60, 79, 76]	71.6667	[-2.3288273623118854, 0.16523189586879544, -1.980933263043751]	-1.38151e+16	-0.3903929889202118
256	In 1947, a swinging log on the sawmill skidway knocked Pat Doherty off the riverbank, requiring hospital treatment.	1947 wurde Pat Doherty von einem schwingenden Log auf der S√§gewerkskidway aus dem Flussufer geschlagen, das eine station√§re Behandlung erforderte.	[78, 65, 72]	71.6667	[-0.3973496333386544, -2.0531455465314647, -2.3553307191444177]	-1601941966338170	-0.5744326710700989
344	Consumed with hatred, the Mess slaughtered the human responsible before escaping.	Mit Hass verzehrt, t√∂tete das Chaos den verantwortlichen Menschen, bevor er entkam.	[72, 78, 65]	71.6667	[-2.3553307191444177, 0.6177824849607275, -2.2815014184266786]	-1.33968e+16	-0.563345193862915
1092	Often, as a courtesy, motorists yield to funeral processions.	Oft, als H√∂flichkeit, Autofahrer geben Beerdigung Prozessionen.	[72, 77, 66]	71.6667	[-2.3553307191444177, -0.15167916733124173, -2.192014754755912]	-1.56634e+16	-0.44640055298805237
1217	He performed solo, accompanying himself on a borrowed Fender Telecaster.	Er trat solo auf und begleitete sich auf einem ausgeliehenen Fender Telecaster.	[72, 75, 68]	71.6667	[-1.6550947727313112, -0.05103048675956321, -1.1854504325226372]	-0.963858564004504	-0.32921135425567627
1248	Cod, haddock, whiting, saithe, plaice, sole, mackerel, herring, pouting, sprat, and sandeel are all very common and are fished commercially.	Kabeljau, Schellfisch, Wittling, Seelachs, Scholle, Seezunge, Makrele, Hering, Beutel, Sprotte und Sandaal sind allesamt sehr verbreitet und werden kommerziell befischt.	[72, 66, 77]	71.6667	[-2.3553307191444177, -2.0574694019204354, -0.15167916733124173]	-1.52149e+16	-0.22239919006824493
1334	Such an incident doesn‚Äôt happen even in the other Homeric epic, The Odyssey, where Athena always appears to Odysseus in disguise.	Solch ein Vorfall findet sogar im anderen Homeric Epos statt, The Odyssey, wo Athena Odysseus immer verschleiert erscheint.	[72, 81, 62]	71.6667	[-2.3553307191444177, 0.05066851252855241, -2.5285121413315204]	-1611058115982460	-0.47147053480148315
1354	In August, Governor William Berkeley stormed Opechancanough's stronghold and captured him.	Im August st√ºrmte Gouverneur William Berkeley Opechancanough 's Festung und eroberte ihn.	[100, 77, 99, 40, 65, 49]	71.6667	[0.2654514735602496, -0.32967577825642896, 0.7610451463793909, -1.2949491214775863, -0.24062326775404502, -0.7401558908226167]	-0.26315123972850607	-0.23149742186069489
1775	In Poland, the episodes aired on Ale Kino+ on 11, 18 and 25 March 2016.	In Polen wurden die Episoden am 11., 18. und 25. M√§rz 2016 auf Ale Kino + ausgestrahlt.	[72, 65, 78]	71.6667	[-2.3553307191444177, -2.0531455465314647, -1.1181747907067108]	-1.84222e+16	-0.23220659792423248
1816	Bradburn enforced the 1830 laws strictly, angering many colonists.	Bradburn setzte die Gesetze von 1830 strikt durch und √§rgerte viele Kolonisten.	[72, 68, 75]	71.6667	[-1.6550947727313112, -1.6115940874402417, -0.5198479236489196]	-1.26218e+16	-0.3495781719684601
2352	He puffed on it himself, and then passed it to the twins, who each puffed on it themselves.	Er puffte es selbst an und gab es dann an die Zwillinge weiter, die jeder von ihnen selbst puffte.	[71, 73, 71]	71.6667	[-1.1024123569313533, -0.7100200690414104, -0.9427811157199508]	-0.9184045138975714	-0.5751760005950928
2442	The Prussians then pressed south into Austrian Moravia.	Die Preu√üen drangen dann nach S√ºden in √ñsterreich ein.	[72, 78, 65]	71.6667	[-1.6550947727313112, -0.23458970556018363, -1.548174255089806]	-1.14595e+16	-0.5527400970458984
3122	In March 1990, she and the Prince of Wales toured Nigeria and Cameroon.	Im M√§rz 1990 tourten sie und der Prinz von Wales durch Nigeria und Kamerun.	[72, 78, 65]	71.6667	[-2.3553307191444177, 0.006776364268776851, -0.8885528762095315]	-1.07904e+16	-0.19198083877563477
3451	Xing Yu as the Coolie, a Kung Fu specialist of T√°n Tu«ê Twelve Kicks technique from the Tam School.	Xing Yu als die Coolie, ein Kung Fu Spezialist von T√°n TuÿßTzw√∂lf Kicks Technik aus der Tam School.	[72, 78, 65]	71.6667	[-1.6550947727313112, -0.23458970556018363, -1.5079999022886195]	-1.13256e+16	-0.5923253297805786
3710	Coulrophobia Evil clowns Bogeyman Official Halloween Parody, parody of the film	Coulrophobia B√∂se Clowns Bogeyman Offizielle Halloween Parodie, Parodie des Films	[72, 76, 67]	71.6667	[-2.3553307191444177, -0.4247618509526743, -1.181227721089917]	-1.32044e+16	-0.1255493462085724
3925	Native American and Hispanic cowboys compete in modern rodeos in small numbers.	Indische und hispanische Cowboys konkurrieren in kleinen St√ºckzahlen in modernen Rodeos.	[72, 75, 68]	71.6667	[-2.3553307191444177, -0.4685902305312789, -1.026150979220333]	-1.28336e+16	-0.40954408049583435
3958	Clint Bowyer flipped over, and slid down the track on his roof.	Clint Bowyer kippte um und rutschte die Strecke auf seinem Dach hinunter.	[87, 68, 60]	71.6667	[-0.31279481766981004, -1.1854504325226372, -1.2502945949515705]	-0.9161799483813393	-0.40081390738487244
4281	Kurita's force consisted of five battleships‚Äîincluding and , the largest battleships ever built‚Äîescorted by cruisers and destroyers.	Kuritas Truppen bestanden aus f√ºnf Schlachtschiffen einschlie√ülich und, die gr√∂√üten jemals gebaut Schlachtschiffe von Kreuzfahrern und Zerst√∂rern.	[64, 80, 71]	71.6667	[-1.5657947233076184, -0.18274099678607322, -1.1024123569313533]	-0.9503160256750149	-0.4754427969455719
4594	Howe, emboldened by his Long Island victory, dispatched Washington as "George Washington, Esq.	Howe, ermutigt durch seinen Long Island Sieg, schickte Washington als "George Washington, Esq.	[100, 74, 83, 50, 48, 75]	71.6667	[0.2654514735602496, -1.802557914408088, 0.2408406579210431, -0.89218775095613, -0.9476250637985012, 0.197305994062219]	-0.48979543393653463	-0.3070090413093567
4692	Repetition had staled even this most grisly of entertainments, and audiences grew bored.	Die Wiederholung hatte sogar diese gruseligsten Unterhaltungen gestoppt, und das Publikum wurde gelangweilt.	[72, 74, 69]	71.6667	[-2.3553307191444177, -0.614933996345165, -1.0675351751577902]	-1.34593e+16	-0.4237542152404785
5274	After this interchange the highway parallels US 522 before curving east into Huntingdon County.	Nach diesem Austausch verl√§uft die Autobahn parallel zu US 522, bevor sie nach Osten in den Huntingdon County kurvt.	[72, 81, 62]	71.6667	[-2.3553307191444177, 0.05066851252855241, -1.465459085920234]	-1.25671e+16	-0.5182804465293884
5366	Twice in the upper left arm, between shoulder and elbow, one bullet fracturing his arm.	Zweimal im linken Oberarm, zwischen Schulter und Ellbogen, eine Kugel bricht seinen Arm.	[75, 68, 72]	71.6667	[-0.4685902305312789, -2.304658550495256, -2.3553307191444177]	-1709526500056980	-0.3173399865627289
5679	However, it cautions against overemphasis on demonology and rejects the belief that Christians can be possessed by evil spirits.	Sie warnt jedoch vor √úberbetonung der D√§monologie und lehnt den Glauben ab, dass Christen von b√∂sen Geistern besessen werden k√∂nnen.	[72, 80, 63]	71.6667	[-2.3553307191444177, 0.323687427468814, -1.6608807960038638]	-1.23084e+16	-0.31854042410850525
5817	Correspondences do exist indeed in the Cantilena between the various symbolisms which Caxaro harmoniously employs.	Entsprechungen gibt es tats√§chlich in der Cantilena zwischen den verschiedenen Symbolismen, die Caxaro harmonisch einsetzt.	[72, 75, 68]	71.6667	[-2.3553307191444177, -0.4685902305312789, -1.6115940874402417]	-1.47851e+16	-0.2874836325645447
6034	They willingly eat the berries of mountain ash, lily of the valley, bilberries, blueberries and cowberry.	Sie essen gerne die Beeren von Bergasche, Lilie des Tales, Heidelbeeren, Heidelbeeren und Cowberry.	[87, 70, 58]	71.6667	[-0.31279481766981004, -0.6858367682838149, -2.1363111594850905]	-1.04498e+16	-0.38508841395378113
6287	The Marathas extracted a large tribute from the Mughals and signed a treaty which ceded Malwa to the Marathas.	Die Marathas extrahiert einen gro√üen Tribut aus den Moguln und unterzeichnete einen Vertrag, der Malwa an die Marathas abgetreten.	[72, 63, 80]	71.6667	[-2.3553307191444177, -1.6608807960038638, 0.323687427468814]	-1.23084e+16	-0.28552523255348206
6830	Large Influx of Foreigners Diluting Californio Population	Gro√üer Einfluss von Ausl√§ndern, die die Bev√∂lkerung Kaliforniens verw√§ssern	[100, 96, 75, 51, 66, 42]	71.6667	[0.2654514735602496, 0.4925851553670907, -0.5198479236489196, -0.8519116139039844, -0.19903492681025348, -0.9925494752146878]	-0.30088455177508416	-0.4543331563472748
6843	Short Gaskin/Hocks High Results from a relatively short tibia with a long cannon.	Short Gaskin / Hocks Hohe Ergebnisse einer relativ kurzen Tibia mit einer langen Kanone.	[80, 72, 63]	71.6667	[-0.04441756016769294, -1.6550947727313112, -1.0848726259634645]	-0.9281283196208229	-0.26685407757759094
1026	Trenchard initially attempted to speak to the mutinying soldiers but was heckled and jostled.	Trenchard versuchte zun√§chst, mit den mutinisierenden Soldaten zu sprechen, wurde aber angehakt und geknebelt.	[100, 90, 83, 50, 63, 45]	71.8333	[0.2654514735602496, -0.0443348266575098, 0.2408406579210431, -0.89218775095613, -0.3237999496416281, -0.8843807961895145]	-0.27306853199391495	-0.5168592929840088
2212	Jane C. Huch, assistant warden at DCC since 1980, became the new warden.	Jane C. Huch, seit 1980 Assistentin bei DCC, wurde die neue Aufseherin.	[100, 84, 94, 60, 48, 45]	71.8333	[0.2654514735602496, 0.33592673061728845, 0.3136118280255572, -0.48942638043467374, -0.9476250637985012, -0.8843807961895145]	-0.2344070347032657	-0.433880090713501
151	Waleszonia then successfully bunted and Paculba singled to score two more runs and keep the bases loaded.	Waleszonia dann erfolgreich geb√ºndelt und Paculba einzeln, um zwei weitere L√§ufe zu punkten und halten die Basen geladen.	[72, 80, 64]	72	[-2.3553307191444177, 1.0636577994409213, -2.3709880820974454]	-1.22089e+16	-0.44149571657180786
252	His field pack included a shovel, a dolabra or pickaxe, and a wicker basket for hauling dirt.	Seine Feldpackung beinhaltete eine Schaufel, eine Dolabra oder Pickaxe und einen Korb f√ºr Schmutz schleppen.	[61, 78, 77]	72	[-2.2215230440355946, 0.006776364268776851, -1.8873338990185842]	-1.36736e+16	-0.49720293283462524
1500	The ahtlatl could also throw spears as its name implies "spear thrower".	Der Achtlatl k√∂nnte auch Speere werfen, wie der Name schon sagt "Speerwerfer".	[78, 77, 61]	72	[-0.23458970556018363, -1.2076614543774775, -1.1663415676010502]	-0.8695309091795704	-0.474093496799469
1508	Mosby's Reminiscences and Stuart's Cavalry Campaigns.	Mosby 's Reminiszenzen und Stuart' s Cavalry Kampagnen.	[72, 81, 63]	72	[-2.3553307191444177, 1.2865954566810183, -2.460474745768212]	-1176403336077200	-0.33003294467926025
1669	Defense mobilization chief Charles Wilson, however, determined to upend the Wage Stabilization Board's recommendations.	Der Mobilisierungschef der Verteidigung Charles Wilson war jedoch entschlossen, die Empfehlungen des Wage Stabilization Board zu √§ndern.	[72, 76, 68]	72	[-2.3553307191444177, -0.4247618509526743, -1.1243814481238537]	-1.30149e+16	-0.46534463763237
1743	The Chinese armies now converged on attacking Kaungton.	Die chinesischen Armeen kamen nun beim Angriff auf Kaungton zusammen.	[72, 66, 78]	72	[-1.6550947727313112, -2.0574694019204354, -0.23458970556018363]	-1.31572e+16	-0.39863455295562744
1920	In 1987, Kuwait asked to reflag its tankers to the U.S. flag.	1987 bat Kuwait, seine Tanker an die US-Flagge zur√ºckzugeben.	[82, 62, 72]	72	[0.14575458522479776, -1.110579489363207, -0.5886067189991463]	-0.5178105410458519	-0.5232690572738647
1940	First, Ne Myo Sithu easily retook the lightly held Bhamo.	Zun√§chst nahm Ne Myo Sithu leicht den leicht gehaltenen Bhamo wieder auf.	[65, 79, 72]	72	[-1.0490215880082523, -0.13950363286393827, -2.3553307191444177]	-1.18129e+16	-0.36931517720222473
2125	In Mid January, the former Ag Bahanga faction military commander, Lt. Col. Hassane Fagaga, returned to ceasefire and cantonment near Kidal.	Mitte Januar kehrte der ehemalige Milit√§rkommandeur der Ag Bahanga-Fraktion, Lt. Col. Hassane Fagaga, in Waffenruhe und Kantonment bei Kidal zur√ºck.	[100, 82, 92, 50, 68, 40]	72	[0.2654514735602496, 0.14575458522479776, 0.1346385006840237, -0.89218775095613, -0.11585824492267038, -1.0646619278981369]	-0.25447722738464434	-0.2629295885562897
2148	Other malignant tumors include liposarcoma, leiomyosarcoma, malignant fibrous histiocytoma and mesothelioma.	Andere b√∂sartige Tumoren sind Liposarkom, Leiomyosarkom, maligne faserige Histiozytom und Mesotheliom.	[64, 86, 66]	72	[-1.899610089206723, 1.2744206170689254, -2.0574694019204354]	-0.8942196246860776	-0.20929181575775146
2205	Caesar, Pompey and Crassus agreed on the consulship of the latter two and the extension of Caesar's governorship.	Caesar, Pompey und Crassus einigten sich auf das Konsulat der beiden letzteren und die Verl√§ngerung des Gouvernements Caesars.	[72, 79, 65]	72	[-2.3553307191444177, -0.13950363286393827, -2.0531455465314647]	-1.51599e+16	-0.3182489275932312
2568	Equipped lifters compete separately from raw lifters.	Ausgestattet Lifter konkurrieren getrennt von rohen Lifter.	[68, 81, 67]	72	[-2.0130414274143784, 1.2865954566810183, -1.2805365052188824]	-0.6689941586507476	-0.38361427187919617
2815	A stream rises north of Bearsted and powered two watermills before joining the River Len.	Ein Strom steigt n√∂rdlich von Bearsted und versorgt zwei Wasserm√ºhlen, bevor er dem Fluss Len beitritt.	[77, 65, 74]	72	[-0.32967577825642896, -1.7923057709304324, -0.6270457621312975]	-0.9163424371060529	-0.41036441922187805
3460	Usually a plebeian tribune would preside over the assembly.	Normalerweise w√ºrde eine plebejische Trib√ºne √ºber der Versammlung vorstehen.	[68, 76, 72]	72	[-0.7760070199361482, -0.4247618509526743, -1.6550947727313112]	-0.9519545478733779	-0.35682371258735657
3529	Nevertheless, he bowled 54 overs and took eight wickets in the match.	Dennoch kr√ºmmte er 54 Overs und nahm acht Dochte im Spiel.	[100, 99, 100, 50, 48, 35]	72	[0.2654514735602496, 1.7622178210609687, 0.8505318100501577, -0.89218775095613, -0.9476250637985012, -1.244943059606759]	-0.03442579494833564	-0.5907974243164062
3605	Nicholas I inspected the Caucasus in September and October.	Nikolaus I. inspizierte den Kaukasus im September und Oktober.	[70, 67, 79]	72	[-0.6774931089219965, -1.8345317446803386, 0.16523189586879544]	-0.7822643192445132	-0.2790471017360687
3732	Stewart retaliated by reversing into him, smashing Keselowski's front in.	Stewart vergeltet, indem er sich in ihn umkehrte und Keselowskis Front einschlug.	[82, 81, 53]	72	[-0.7602281360236438, 0.05066851252855241, -2.6108638357030336]	-1.10681e+16	-0.5401067733764648
4265	He was subjected to the usual quackery, cautery and bleeding.	Er war der √ºblichen Quacksalberei, Vorsicht und Blutung ausgesetzt.	[72, 77, 67]	72	[-2.3553307191444177, -0.32967577825642896, -1.7362344833314276]	-1.47375e+16	-0.3751513361930847
4344	The Whopper is a 4 oz hamburger with lettuce, tomato, mayonnaise, pickle, and ketchup, that was priced at 29¬¢.	Der Whopper ist ein 4 Unzen Hamburger mit Salat, Tomate, Mayonnaise, Pickle und Ketchup, der bei 29 ¬¢preiswert war.	[72, 76, 68]	72	[-2.3553307191444177, -0.4247618509526743, -1.1243814481238537]	-1.30149e+16	-0.3266550600528717
4426	Before 1803, the 70 ton gaffed rigged schooner Dorcus & Sally was built at Wheeling and fitted at Marietta, Ohio.	Vor 1803 wurde der 70 Tonnen schwere manipulierte Schoner Dorcus & Sally in Wheeling gebaut und in Marietta, Ohio, montiert.	[72, 69, 75]	72	[-2.3553307191444177, -1.0903643598263917, -0.4685902305312789]	-1.30476e+16	-0.33847737312316895
4474	However, it grossed less than $1 million and, according to Eastwood and Lang, flopped due to poor publicity and the "emasculated" role of Eastwood.	Jedoch nahm es weniger als $1 Million ein und, entsprechend Eastwood und Lang, floppte wegen der schlechten Werbung und der "emasculated" Rolle von Eastwood.	[78, 82, 56]	72	[0.006776364268776851, -1.1330903996251973, -1.717772850363513]	-0.9480289619066445	-0.3893592357635498
4660	Several entertainers canceled appearances in Israel.	Mehrere Entertainer abgesagt Auftritte in Israel.	[72, 100, 90, 68, 51, 51]	72	[-0.8051061417376557, 0.2654514735602496, -0.0443348266575098, -0.1672172840175087, -0.8228600409671266, -0.6680434381391678]	-0.3736850429931198	-0.32156816124916077
4856	Storage spaces at the north end of the skillions are accessed by double doors across the skillions.	Lagerr√§ume am n√∂rdlichen Ende der Skillionen sind durch Doppelt√ºren √ºber die Skillionen zug√§nglich.	[80, 64, 72]	72	[-1.6065358069430842, -2.2116010781314834, -0.47136646481847094]	-1429834449964340	-0.4726463854312897
4915	The Black Crusade, Richard Harland Less than Human, Maxine McArthur The Crooked Letter, Sean Williams	The Black Crusade, Richard Harland Weniger als Mensch, Maxine McArthur Der krumme Brief, Sean Williams	[72, 81, 63]	72	[-2.3553307191444177, -0.0754366785097826, -2.460474745768212]	-1.63041e+16	-0.20491789281368256
5354	New Mexico Governor Bill Richardson, a former 2008 Democratic candidate, endorsed Obama on March 21.	Der Gouverneur von New Mexico Bill Richardson, ehemaliger demokratischer Kandidat von 2008, best√§tigte Obama am 21. M√§rz.	[77, 67, 72]	72	[-0.15167916733124173, -2.3883419898431173, -2.3553307191444177]	-1.63178e+16	-0.3192923069000244
5484	Understudy Constance Carpenter began replacing her in matinee performances.	Constance Carpenter begann sie in Matinee Performances zu ersetzen.	[66, 62, 70, 65, 79, 90]	72	[-2.9169269032954177, -2.806759186582424, -0.9952782871301464, -0.28804569517394557, 0.34161350545903657, 0.7381493891880857]	-0.9878745295891352	-0.46096572279930115
5500	They narrate myths, caste myths, or other narratives only to their patrons.	Sie erz√§hlen Mythen, Kastenmythen oder andere Erz√§hlungen nur ihren G√∂nnern.	[67, 72, 77]	72	[-0.9004101963737501, -0.719843458479854, -0.15167916733124173]	-0.5906442740616152	-0.35752740502357483
5820	On 2 June, Eagle departed from Gibraltar escorted by the cruiser Charybdis and destroyers , , , and .	Am 2. Juni reiste Eagle von Gibraltar ab, begleitet von dem Kreuzer Charybdis und Zerst√∂rern,, und.	[72, 75, 69]	72	[-2.3553307191444177, -0.05103048675956321, -1.4193234201313905]	-1.27523e+16	-0.37364262342453003
5982	She confronts Ryan and he kidnaps her, before locking her in the basement at Hollyoaks High.	Sie konfrontiert Ryan und er entf√ºhrt sie, bevor sie im Keller von Hollyoaks High gesperrt wird.	[72, 76, 68]	72	[-1.6550947727313112, -0.31924250461317866, -1.1854504325226372]	-1053262569955700	-0.32755589485168457
6336	His feasts infuriated the burghers, who called him a drunkard or a greedy new Sardanapalus in defamatory poems.	Seine Feste erz√ºrnten die Burger, die ihn in verleumderischen Gedichten einen Trunkenbold oder einen gierigen neuen Sardanapalus nannten.	[68, 76, 72]	72	[-1.577778951731409, -0.4247618509526743, -2.3553307191444177]	-1.45262e+16	-0.259831041097641
6639	Slayer headlined the second Mayhem Festival in the summer of 2009.	Im Sommer 2009 war Slayer Headliner des zweiten Mayhem Festivals.	[72, 79, 65]	72	[-0.8066115009625221, -0.13950363286393827, -2.2815014184266786]	-1.07587e+16	-0.49319273233413696
6743	Florida State faculty contributed to several areas of the CMS, especially the electromagnetic calorimeter and the hadron calorimeter.	Florida State Fakult√§t trug zu mehreren Bereichen des CMS, insbesondere dem elektromagnetischen Kalorimeter und dem Hadron Kalorimeter.	[72, 79, 65]	72	[-2.3553307191444177, 0.16523189586879544, -2.2815014184266786]	-1490533413900760	-0.31595927476882935
6744	Once the funeral cortege departed, two companies of bluejackets and a battalion of U.S. Marines acted as honor guards for the dead.	Sobald die Beerdigung cortege gegangen, zwei Unternehmen von Bluejackets und ein Bataillon der US-Marines fungierte als Ehrenw√§chter f√ºr die Toten.	[66, 75, 75]	72	[-1.6850014526541417, -0.4685902305312789, -0.05103048675956321]	-0.734874056648328	-0.44681817293167114
2605	A continuous modillion cornice runs along the top of the building, with a balustrade concealing the low hipped roof.	Ein durchgehendes Modillion Cornice l√§uft entlang der Spitze des Geb√§udes, mit einer Balustrade, die das niedrige H√ºftdach verdeckt.	[100, 87, 81, 45, 70, 50]	72.1667	[0.2654514735602496, 0.6211849487060245, -0.8497147996944105, -1.093568436216858, -0.032681563035087305, -0.7040996644808922]	-0.29890467352682903	-0.48345500230789185
3393	Interest petered out by the 1890s, and when Ross died the Journal soon closed.	Das Interesse versteinerte in den 1890er Jahren, und als Ross starb, schloss das Journal bald.	[100, 95, 87, 50, 41, 60]	72.1667	[0.2654514735602496, 0.40309849169632395, 0.6211849487060245, -0.89218775095613, -1.238743450405042, -0.3435374010636478]	-0.19745561474370363	-0.4360162615776062
4358	Thiru wears formals and impresses Anandhi after she tells him that formals would look good on him.	Thiru tr√§gt Formale und beeindruckt Anandhi, nachdem sie ihm erz√§hlt hat, dass Formale gut auf ihm aussehen w√ºrden.	[100, 100, 100, 45, 48, 40]	72.1667	[0.2654514735602496, 0.8505318100501577, 0.37321150863630664, -1.093568436216858, -0.9476250637985012, -1.0646619278981369]	-0.26944343927779707	-0.34790340065956116
5094	Food often took the form of crackers or hardtack; Southerners sometimes chose cornmeal or pinole rather than wheat flour.	Das Essen nahm oft die Form von Cracker oder Hardtack; S√ºdl√§nder w√§hlten manchmal Maismehl oder Pinole statt Weizenmehl.	[92, 100, 95, 45, 51, 50]	72.1667	[1.0966153121872513, 0.2654514735602496, 0.40309849169632395, -1.093568436216858, -0.8228600409671266, -0.7040996644808922]	-0.14256047737017533	-0.4507477581501007
230	Mining occurred on the Hammond River, a tributary of the Koyukuk River, from about 1900 to at least 2000.	Am Hammond River, einem Nebenfluss des Koyukuk River, wurde von 1900 bis mindestens 2000 Bergbau betrieben.	[69, 71, 77]	72.3333	[-1.36308849782527, -1.1024123569313533, 0.3948448277206306]	-0.6902186756786642	-0.40363386273384094
404	Parker appointed him as Master and Commander of the brig on 8 December.	Parker ernannte ihn am 8. Dezember zum Meister und Kommandanten der Brig.	[60, 75, 82]	72.3333	[-1.5879033583970728, -0.5198479236489196, -0.7602281360236438]	-0.9559931393565453	-0.19915740191936493
1893	He shook dreadfully for a time, and groaned while flailing about.	Er sch√ºttelte f√ºrchterlich eine Zeit lang und st√∂hnte, w√§hrend er drohte.	[80, 72, 65]	72.3333	[-0.9392014633651773, -0.5636386803936028, -1.4707086506113731]	-0.9911829314567177	-0.5622449517250061
2312	On 4 July Agamemnon sailed from St Fiorenzo with a small force of frigates and sloops, bound for Genoa.	Am 4. Juli segelte Agamemnon von St. Fiorenzo mit einer kleinen Kraft von Fregatten und Sloops nach Genua.	[69, 82, 66]	72.3333	[-1.9235547637436115, 0.14575458522479776, -1.2380739940559804]	-1.00529e+16	-0.37052884697914124
2560	Similarly, the negative ne "not" and conjunctions such as kaj "and" and ke "that" must precede the phrase or clause that they introduce.	Ebenso muss das negative ne "nicht" und Konjunktionen wie kaj "und" und ke ", die" dem Satz oder der Klausel, die sie einf√ºhren, vorausgehen.	[73, 73, 71]	72.3333	[-0.7100200690414104, -0.49690580123975703, -1.1024123569313533]	-0.7697794090708402	-0.46112823486328125
4391	This massacre provoked torrents of condemnation, even from conservative Republicans.	Dieses Massaker l√∂ste sogar von konservativen Republikanern Verurteilungen aus.	[83, 73, 61]	72.3333	[-0.6707414723528771, -0.7100200690414104, -1.1951539386222017]	-0.8586384933388297	-0.4699801802635193
4796	Van Alstyne rarely accompanied Crosby when she traveled, and she vacationed without him.	Van Alstyne begleitete Crosby selten, als sie reiste, und sie reiste ohne ihn.	[89, 100, 90, 51, 54, 50]	72.3333	[0.8113570940985152, 0.2654514735602496, -0.0443348266575098, -0.8519116139039844, -0.698095018135752, -0.7040996644808922]	-0.2036054259198956	-0.3488227128982544
5360	The Swiss Chief of Police Heinrich Rothmund and the Croatian Roman Catholic priest Krunoslav Draganoviƒá also helped organize the ratline.	Auch der Schweizer Polizeichef Heinrich Rothmund und der kroatische r√∂misch-katholische Priester Krunoslav Draganoviƒá halfen bei der Organisation der Ratline.	[100, 76, 97, 51, 65, 45]	72.3333	[0.2654514735602496, -1.2971481180482443, 1.572045675668478, -0.8519116139039844, -0.24062326775404502, -0.8843807961895145]	-0.2394277744445101	-0.2970759868621826
6500	He scored 34 and 26 and took two wickets in each innings as Tasmania won by six wickets.	Er erzielte 34 und 26 und nahm zwei Pforten in jedem Gasthof als Tasmanien von sechs Pforten gewonnen.	[61, 81, 75]	72.3333	[-2.2215230440355946, 0.4821429590688326, -0.05103048675956321]	-0.5968035239087751	-0.31382790207862854
2609	with stone urns at corners and at the centre a statue of Ceres on tall curved base with moulded capping and swag and cartouche ornament.	mit Steinurnen an Ecken und in der Mitte eine Statue von Ceres auf hoch gew√∂lbtem Sockel mit geformter Decke und Schwag und Kartusche Ornament.	[100, 86, 78, 51, 50, 70]	72.5	[0.2654514735602496, -0.4022814813405768, -0.23458970556018363, -0.8519116139039844, -0.8644483819109182, 0.017024862353596727]	-0.3451258078003028	-0.4584795832633972
2805	During the feud, Razor verbally disrespected Hart and the Hart wrestling family.	W√§hrend der Fehde missachtete Razor verbal Hart und die Hart Wrestling Familie.	[100, 93, 72, 65, 50, 55]	72.5	[0.2654514735602496, 0.22412516435479046, -0.8051061417376557, -0.28804569517394557, -0.8644483819109182, -0.5238185327722701]	-0.3319736856132916	-0.3466114401817322
4124	When Ronnie returns, Jack begs her to reunite with him, but she refuses.	Als Ronnie zur√ºckkehrt, bittet Jack sie, sich wieder mit ihm zu vereinen, aber sie weigert sich.	[100, 86, 95, 50, 44, 60]	72.5	[0.2654514735602496, -0.4022814813405768, -0.04520568810300005, -0.89218775095613, -1.1139784275736675, -0.3435374010636478]	-0.42195654591279536	-0.3562032878398895
4712	Males will mate guard throughout prolonged copulation with the female.	M√§nnchen paaren Wache w√§hrend der langen Kopulation mit dem Weibchen.	[89, 100, 89, 50, 42, 65]	72.5	[0.8113570940985152, 0.2654514735602496, -0.13382149032827656, -0.89218775095613, -1.1971551094612505, -0.16325626935502552]	-0.21826867540698627	-0.45294758677482605
5017	M√©lange and abyssal peridotites, formed largely in an ancient oceanic basin, are the primary rocks of the Cache Creek Terrane.	M√©lange und abyssal peridotites, gebildet gr√∂√ütenteils in einem alten ozeanischen Becken, sind die prim√§ren Felsen des Cache Creek Terrane.	[83, 100, 85, 51, 68, 48]	72.5	[0.2408406579210431, 0.2654514735602496, -0.4917681450113435, -0.8519116139039844, -0.11585824492267038, -0.7762121171643411]	-0.2882429982535078	-0.3241669237613678
1	However, a disappointing ninth in China meant that he dropped back to sixth in the standings.	Eine entt√§uschende Neunte in China bedeutete jedoch, dass er in der Gesamtwertung auf den sechsten Platz zur√ºckfiel.	[61, 70, 87]	72.6667	[-1.1951539386222017, 0.04217636328434989, -0.31279481766981004]	-0.4885907976692206	-0.43104609847068787
96	The episode closes with Bloom reading a magazine story named Matcham‚Äôs Masterstroke, by Mr. Philip Beaufoy, while defecating in the outhouse.	Die Episode schlie√üt mit Bloom Lesen einer Zeitschrift Geschichte namens Matcham war Masterhub, von Herrn Philip Beaufoy, w√§hrend Stuhlgang im Nebengeb√§ude.	[78, 58, 82]	72.6667	[-0.3973496333386544, -3.1623342677315947, 1.5095331139211152]	-0.683383595716378	-0.47621625661849976
685	She then heard another gunshot and then Governor Connally yelling.	Sie h√∂rte dann einen weiteren Schuss und dann Gouverneur Connally schreien.	[73, 66, 79]	72.6667	[-2.261731355119251, -2.192014754755912, -0.2900453150623638]	-1581263808312500	-0.37254711985588074
938	They will eat sweet lupines, but will reject bitter lupines and other plants with high quinolizidine alkaloids.	Sie werden s√º√üe Lupinen essen, aber bittere Lupinen und andere Pflanzen mit hohen Quinolizidin-Alkaloiden ablehnen.	[65, 80, 73]	72.6667	[-2.0531455465314647, -0.3993060917939222, -1.5656081090605445]	-1339353249128640	-0.2407410889863968
1020	She accidentally spills some and uses Baelfire's shawl as a wiping rag.	Sie versch√ºttet versehentlich einige und benutzt Baelfire 's Tuch als Wischtuch.	[73, 69, 76]	72.6667	[-2.261731355119251, -1.4193234201313905, 0.1719071704805337]	-1.16972e+16	-0.4564271867275238
1455	She retained her dowry and any settlement deeded to her by her husband.	Sie behielt ihre Mitgift und jede Siedlung wurde ihr von ihrem Mann erlassen.	[73, 64, 81]	72.6667	[-2.261731355119251, -2.2116010781314834, 0.05066851252855241]	-1474221306907390	-0.46871843934059143
2346	Bruce, like a lot of his comrades, participated in goon baiting.	Bruce, wie viele seiner Kameraden, nahm am Ziegenbaiten teil.	[82, 66, 70]	72.6667	[0.14575458522479776, -1.6850014526541417, -1.2608678885313718]	-0.9333715853202387	-0.4668944776058197
2764	This regiment surrendered with the Army of Tennessee at Greensboro, North Carolina, 26 April 1865.	Dieses Regiment ergab sich mit der Army of Tennessee in Greensboro, North Carolina, am 26. April 1865.	[73, 80, 65]	72.6667	[-2.261731355119251, -0.9392014633651773, -1.7923057709304324]	-1.66441e+16	-0.26892563700675964
2782	She becomes annoyed with Kim's meddling and injects her with potassium chloride.	Sie √§rgert sich √ºber Kims Einmischung und injiziert sie mit Kaliumchlorid.	[76, 82, 60]	72.6667	[-0.4247618509526743, -0.7602281360236438, -1.2221036458388934]	-0.8023645442717372	-0.2433595061302185
3006	Apparently, Santino tries relaying Bro's real message to Rico, which instantly infuriates the latter.	Anscheinend versucht Santino Bros wahre Botschaft an Rico weiterzugeben, was letztere augenblicklich w√ºtend macht.	[76, 72, 70]	72.6667	[-0.23165893401848944, -0.719843458479854, -1.2608678885313718]	-0.7374567603432384	-0.3721175193786621
3220	Embarking on Admiral Andrew H. Foote's naval flotilla, the expedition steamed south on February 3, 1862 with two divisions of 15,000 men.	Die Expedition, die Admiral Andrew H. Foote am 3. Februar 1862 mit zwei Divisionen von 15.000 Mann in den S√ºden d√§mmerte, begann mit der Flottille.	[70, 78, 70]	72.6667	[-0.6774931089219965, 0.6177824849607275, -1.2608678885313718]	-0.44019283749754695	-0.5428774356842041
3709	General Edward Hand, the local military commander, banished Col. Croghan from the frontier in 1777 on suspicion of treason.	General Edward Hand, der √∂rtliche Milit√§rkommandeur, verbannte Col. Croghan 1777 unter Verdacht auf Verrat von der Grenze.	[73, 79, 66]	72.6667	[-2.261731355119251, -1.028688127035944, -0.8875311764118344]	-1.39265e+16	-0.3433857858181
3746	In some historical periodizations, 1877 marks the beginning of the Jim Crow era.	In einigen historischen Periodizationen markiert 1877 den Beginn der Jim-Crow-√Ñra.	[71, 78, 69]	72.6667	[-1.1484798612726888, 0.006776364268776851, -1.3886564302001447]	-0.8434533090680189	-0.26016032695770264
3976	During a s√©ance d'Albe observed white muslin between Goligher's feet.	W√§hrend einer S√©ance d 'Albe beobachtet wei√üen Muslin zwischen Golighers F√º√üen.	[100, 100, 84, 60, 42, 50]	72.6667	[0.2654514735602496, 0.8505318100501577, -0.9657235209294747, -0.48942638043467374, -1.1971551094612505, -0.7040996644808922]	-0.3734035652826473	-0.3245433270931244
4503	Zod sends Supergirl off and then arrests the Legionnaires, branding them terrorists.	Zod schickt Supergirl ab und verhaftet dann die Legion√§re und brandmarkt sie als Terroristen.	[86, 100, 90, 50, 55, 55]	72.6667	[0.5260988760097791, 0.2654514735602496, -0.0443348266575098, -0.89218775095613, -0.6565066771919604, -0.5238185327722701]	-0.22088290633464025	-0.39138278365135193
4674	In June 1972 during night raids, Hanson dueled with North Vietnamese 152 millimeter coastal batteries near Hon La and Hon Mat islands.	Im Juni 1972 dulierte sich Hanson bei n√§chtlichen Razzien mit 152 Millimeter K√ºsten-Batterien aus Nordvietnamesisch in der N√§he der Inseln Hon La und Hon Mat.	[86, 100, 91, 51, 68, 40]	72.6667	[0.5260988760097791, 0.2654514735602496, 0.04515183701325695, -0.8519116139039844, -0.11585824492267038, -1.0646619278981369]	-0.199288266690251	-0.4059984087944031
4879	The Sami extirpated wolves in northern Sweden in organized drives.	Die Sami extirierten W√∂lfe in Nordschweden in organisierten Fahrten.	[73, 76, 69]	72.6667	[-1.5656081090605445, 0.1719071704805337, -1.0903643598263917]	-0.8280217661354675	-0.3595561385154724
4920	Substituting the circular points into the equation for a generic conic yields the two equations	Ersetzen der Kreispunkte in die Gleichung f√ºr eine generische Konische ergibt die beiden Gleichungen	[71, 86, 61]	72.6667	[-1.744581436402078, 0.5260988760097791, -1.5223053588862974]	-0.9135959730928654	-0.3974473178386688
5676	The French army greatly outnumbered the British and Prussians on the continent.	Die franz√∂sische Armee √ºbertraf die Briten und Preu√üen auf dem Kontinent erheblich.	[77, 85, 56]	72.6667	[-0.32967577825642896, -0.4917681450113435, -1.8065367237166146]	-0.8759935489947956	-0.4261929988861084
5787	Michaelis then made the hypothesis that the metopes on this facade could represent Gigantomachy.	Michaelis machte dann die Hypothese, dass die Metope an dieser Fassade Gigantomachie darstellen k√∂nnten.	[83, 55, 80]	72.6667	[0.2408406579210431, -2.8653489536933385, 0.323687427468814]	-0.7669402894344938	-0.32509520649909973
6175	Alongside Odin and Thor, Loki battled Surtur, and witnessed the seeming demise of Odin.	Neben Odin und Thor k√§mpfte Loki gegen Surtur und erlebte den scheinbaren Untergang von Odin.	[80, 66, 72]	72.6667	[-0.04441756016769294, -2.0574694019204354, -0.9439568253313346]	-1.01528e+16	-0.2447226643562317
6912	Texas quarterback James Brown completed 14 of his 36 pass attempts for 148 yards, three interceptions, and a touchdown.	James Brown absolvierte 14 seiner 36 Durchgangsversuche f√ºr 148 Yards, drei Interzeptionen und einen Touchdown.	[66, 79, 73]	72.6667	[-0.8875311764118344, -0.13950363286393827, -1.5656081090605445]	-0.8642143061121056	-0.4245467185974121
2536	A curple refers to 1) the small of the waist before the flare of the hips or 2) a derri√®re, rump or behind.	Ein Curple bezieht sich auf 1) die kleine Taille vor dem Flare der H√ºften oder 2) eine Derri√®re, Rump oder hinten.	[100, 76, 100, 51, 65, 45]	72.8333	[0.2654514735602496, -0.4247618509526743, 0.8505318100501577, -0.8519116139039844, -0.24062326775404502, -0.8843807961895145]	-0.21428237419830184	-0.3481335937976837
4592	Lincoln, embarrassed by the order, rescinded Hunter's declaration and canceled the emancipations.	Lincoln, besch√§mt durch den Befehl, hob Hunter Erkl√§rung und hob die Emanzipationen.	[85, 100, 90, 65, 42, 55]	72.8333	[0.4310128033135338, 0.2654514735602496, -0.0443348266575098, -0.28804569517394557, -1.1971551094612505, -0.5238185327722701]	-0.22614831453186537	-0.44025468826293945
7	16 Penn State in which redshirt freshman Jim Kelly threw for 280 yards and three touchdowns in his first career start as Miami's quarterback.	16 Penn State, in dem Rothemd-Neuling Jim Kelly warf 280 Meter und drei Touchdowns in seiner ersten Karriere starten als Miami Quartier zur√ºck.	[58, 73, 88]	73	[-1.3605759076103077, 0.19319495439928003, -0.2233081539990433]	-0.4635630357366903	-0.322855144739151
212	Michael also later reconciles with Gail after splitting with Eileen, and moves back into No 8.	Michael vers√∂hnt sich sp√§ter auch mit Gail, nachdem er sich mit Eileen gespalten hat, und zieht zur√ºck in Nr. 8.	[80, 63, 76]	73	[-0.04441756016769294, -2.0069144074830136, -0.31013469893126033]	-0.7871555555273222	-0.38208842277526855
375	National Association of Anorexia Nervosa and Associated Disorders Society of Clinical Psychology‚ÄîAnorexia	National Association of Anorexia Nervosa and Associated Disorder Society of Clinical Psychology JournAnorexia	[73, 77, 69]	73	[-2.261731355119251, 0.3948448277206306, -1.4193234201313905]	-1095403315843330	-0.4430498778820038
871	Five bowlers shared the wickets, Johnston and Loxton taking three apiece.	F√ºnf Bowler teilten sich die Dochte, Johnston und Loxton nehmen drei pro St√ºck.	[100, 88, 84, 50, 66, 50]	73	[0.2654514735602496, -0.2233081539990433, 0.33592673061728845, -0.89218775095613, -0.19903492681025348, -0.7040996644808922]	-0.23620871534479682	-0.29276344180107117
1628	On Galerius'death in 311, Maximinus divided the east seizing Asia Minor, with Licinius as western Augustus.	Nach Galerius 'Tod im Jahre 311 teilte Maximinus den Osten, der Kleinasien ergreift, mit Licinius als westlichem Augustus.	[73, 69, 77]	73	[-2.261731355119251, -1.4193234201313905, -0.32967577825642896]	-1.33691e+16	-0.35262900590896606
1790	Andersen suffered a bloodied nose after colliding with David West.	Andersen erlitt nach einem Zusammensto√ü mit David West eine blutr√ºnstige Nase.	[73, 79, 67]	73	[-2.261731355119251, -0.13950363286393827, -1.0966875488312204]	-1.16597e+16	-0.3792976438999176
2485	However, the Japanese government refrained from appointing a Minister Plenipotentiary to Israel until 1955.	Die japanische Regierung verzichtete jedoch darauf, bis 1955 einen bevollm√§chtigten Minister f√ºr Israel zu ernennen.	[67, 79, 73]	73	[-2.102528091085145, -0.13950363286393827, -0.8401500832935365]	-102739393574754	-0.2703290581703186
2935	In areas of muskeg, tussocks form and may collect algae.	In Moschus-Gebieten bilden sich Strau√üe und k√∂nnen Algen sammeln.	[81, 73, 65]	73	[0.05066851252855241, -1.5656081090605445, -1.2949202670220439]	-0.9366199545180119	-0.5226759910583496
2947	Native fish in the Peak District include Atlantic salmon, brown trout, European eel, bullhead, brook lamprey and grayling.	Einheimische Fische im Peak District sind Atlantischer Lachs, Bachforelle, Europ√§ischer Aal, Stierkopf, Bachlamprey und √Ñsche.	[73, 77, 69]	73	[-2.261731355119251, -0.15167916733124173, -1.9235547637436115]	-1.44566e+16	-0.34842053055763245
3472	He leads Wrecker and others on a rampage through the Raft, swearing to take revenge on the New Avengers.	Er f√ºhrt Wrecker und andere auf einer Rampage durch das Raft und schw√∂rt, sich an den Neuen R√§chen zu r√§chen.	[78, 68, 73]	73	[-0.23458970556018363, -2.0130414274143784, -0.49719662874693243]	-0.9149425872404983	-0.37190675735473633
3589	Jan Hus, a theologian and rector at the Charles University, preached in Prague.	Jan Hus, Theologe und Rektor der Karls-Universit√§t, predigte in Prag.	[77, 73, 69]	73	[-1.2076614543774775, -0.49690580123975703, -1.0903643598263917]	-0.931643871814542	-0.20624606311321259
4156	Meanwhile, Madame Sun popularised the qipao as the standard female dress.	W√§hrenddessen popularisierte Madame Sun das Qipao als Standard-Frauenkleid.	[78, 67, 74]	73	[-0.08304754238398711, -1.8345317446803386, -0.6270457621312975]	-0.8482083497318745	-0.41973692178726196
4465	Later, a stationary rainband from the typhoon dropped heavy precipitation on Guam during its dry season.	Sp√§ter lie√ü ein station√§res Regenband vom Taifun w√§hrend der Trockenzeit starke Niederschl√§ge auf Guam fallen.	[73, 82, 64]	73	[-2.261731355119251, 0.14575458522479776, -1.3517665399881071]	-1.15591e+16	-0.30696871876716614
4494	With limited visibility, the first five drives ended in punts.	Bei eingeschr√§nkter Sichtbarkeit endeten die ersten f√ºnf Laufwerke in Bestrafung.	[69, 77, 73]	73	[-1.4193234201313905, -0.32967577825642896, -2.261731355119251]	-1.33691e+16	-0.5656318068504333
4725	Thomas sent the gunboats back to Britain under the escort of .	Thomas schickte die Kanonenboote unter der Begleitung von zur√ºck nach Gro√übritannien.	[77, 70, 72]	73	[-0.5046539516149451, -1.2608678885313718, -0.719843458479854]	-0.8284550995420569	-0.43719837069511414
4734	In other prose fragments, the former AlegƒÉtorul Liber journalist retells embarrassing anecdotes about his Rosettist colleagues.	In anderen Prosafragmenten erz√§hlt der ehemalige Journalist von AlegƒÉtorul Liber peinliche Anekdoten √ºber seine Rosettisten-Kollegen.	[77, 73, 69]	73	[-0.32967577825642896, -1.5656081090605445, -1.0675351751577902]	-0.9876063541582546	-0.20759077370166779
4916	Mufasa is alerted about the incident by his majordomo, the hornbill Zazu, and rescues the cubs.	Mufasa wird von seinem Majordomo, dem Hornvogel Zazu, √ºber den Vorfall alarmiert und rettet die Jungen.	[73, 78, 68]	73	[-2.261731355119251, -0.23458970556018363, -1.577778951731409]	-1358033337470280	-0.2794589400291443
5014	First baseman Matt Adams, on the DL since late May, returned to play on September 11.	Erster Baseman Matt Adams, auf der DL seit Ende Mai, kehrte am 11. September zu spielen.	[86, 73, 60]	73	[-0.4022814813405768, -0.5025396364484968, -1.9461390140925998]	-0.9503200439605578	-0.23021180927753448
5092	Ahead of her introduction, Kylie Miller of The Age branded Elly a "likeable delinquent."	Vor ihrer Einf√ºhrung markierte Kylie Miller of The Age Elly als "sympathischen Delinquenten".	[81, 78, 60]	73	[-0.8497147996944105, -0.23458970556018363, -1.2502945949515705]	-0.7781997000687215	-0.33285683393478394
5280	Gilbert became one of the signers of the Humanist Manifesto II in 1973.	Gilbert wurde 1973 einer der Unterzeichner des Humanistischen Manifests II.	[74, 73, 72]	73	[-0.6270457621312975, -0.7100200690414104, -0.719843458479854]	-0.6856364298841874	-0.1948513239622116
5632	The randomness of the metallic lithium embedded in the anode during intercalation results in dendrites formation.	Die Zuf√§lligkeit des in die Anode eingebetteten metallischen Lithium w√§hrend der Zwischenkalkation f√ºhrt zur Dendritbildung.	[73, 77, 69]	73	[-2.261731355119251, -0.15167916733124173, -0.9444804263170459]	-1.1193e+16	-0.4165603816509247
6072	The Khevsurians, who worshipped the male Ochopintre, retained the concept of a tiny protectress of the cliffs.	Die Khevsurer, die den m√§nnlichen Ochopintre verehrten, behielten das Konzept einer winzigen Besch√ºtzerin der Klippen.	[73, 65, 81]	73	[-1.5656081090605445, -0.9913319880093451, 0.05066851252855241]	-0.835423861513779	-0.2708681523799896
6126	Both Sivakumaran and Prabhakaran attempted to assassinate Duraiyappah in revenge for the incident.	Sowohl Sivakumaran als auch Prabhakaran versuchten Duraiyappah aus Rache f√ºr den Vorfall zu t√∂ten.	[73, 80, 66]	73	[-2.261731355119251, -0.9392014633651773, -1.894690014931446]	-1.69854e+16	-0.20655877888202667
6272	Leo discovers Calima, the forbidden, but holy temple of "Semos", the first ape whom the apes revere as a god.	Leo entdeckt Calima, den verbotenen, aber heiligen Tempel des "Semos", den ersten Affen, den die Affen als Gott verehren.	[73, 68, 78]	73	[-2.261731355119251, -1.577778951731409, -0.23458970556018363]	-1358033337470280	-0.2017674595117569
6365	As the lower joint of the first metacarpal is bevelled, the thumb diverges medially.	Da das untere Gelenk des ersten Metakarpals abgeschr√§gt ist, unterscheidet sich der Daumen medial.	[73, 79, 67]	73	[-2.261731355119251, -0.13950363286393827, -1.0966875488312204]	-1.16597e+16	-0.3317168653011322
6654	Jos√© Mar√≠a Larrauri Lafuente, 90, Spanish Roman Catholic prelate, bishop of Vitoria.	Jos√© Mar√≠a Larrauri Lafuente, 90, r√∂misch-katholischer Pr√§lat Spaniens, Bischof von Vitoria.	[73, 73, 73]	73	[-0.785501293731316, -0.7100200690414104, -0.49690580123975703]	-0.6641423880041611	-0.14341774582862854
6673	After a defensive stop by the Gators on the ensuing Warriors' drive, special teams standout Brandon James returned a punt for a touchdown.	Nach einem defensiven Stopp der Gators auf dem anschlie√üenden Warriors 'Drive, holten spezielle Teams Brandon James einen Punt f√ºr einen Touchdown zur√ºck.	[89, 69, 61]	73	[-0.13382149032827656, -1.0903643598263917, -1.1951539386222017]	-0.8064465962589566	-0.47608068585395813
6681	The umpire, a Michigan supporter, ruled otherwise.	Der Schiedsrichter, ein Michigan-Unterst√ºtzer, entschied anders.	[71, 74, 74]	73	[-0.6031874131047453, -0.27396814399966013, -0.6270457621312975]	-0.5014004397452343	-0.36693134903907776
6775	In January 1979, Seatrain Lines suddenly closed down.	Im Januar 1979 wurde Seatrain Lines pl√∂tzlich geschlossen.	[73, 77, 69]	73	[-2.261731355119251, -0.15167916733124173, -0.9444804263170459]	-1.1193e+16	-0.20973092317581177
6793	Rousing quickly to the defense, Mohawk villagers fought off the invaders, who kept Caughnawaga under siege for three days.	Schnell zur Verteidigung rei√üend, k√§mpften Mohawk Dorfbewohner von den Invasoren ab, die Caughnawaga drei Tage lang belagerten.	[86, 63, 70]	73	[0.5260988760097791, -2.0069144074830136, -1.2608678885313718]	-0.9138944733348687	-0.3167772591114044
6794	The Excelsior competes in the Overwatch League as a member of the league's Atlantic Division.	Die Excelsior konkurriert in der Overwatch League als Mitglied der Liga Atlantic Division.	[73, 81, 65]	73	[-2.261731355119251, 0.4821429590688326, -1.2711626379301944]	-1016917011326870	-0.21893656253814697
6814	Bolles narrates the controversy between Bishop Potter and Bishop Potter and his clergy skewed in defense of Hopkins.	Bolles erz√§hlt die Kontroverse zwischen Bischof Potter und Bischof Potter und seinem Klerus in der Verteidigung von Hopkins verzerrt.	[73, 74, 72]	73	[-0.9338712247201075, -0.6270457621312975, -0.719843458479854]	-0.7602534817770863	-0.255786269903183
6855	Culture of Pakistan List of stadiums in Pakistan Pakistan Olympic Association Larkana Bulls	Culture of Pakistan Liste der Stadien in Pakistan Pakistan Olympic Association Larkana Bulls	[73, 79, 67]	73	[-2.261731355119251, -0.13950363286393827, -1.181227721089917]	-1194154236357700	-0.2313995659351349
351	The square contains a bronze statue by Marshall Daugherty honoring John Wesley, founder of Methodism.	Das Quadrat enth√§lt eine Bronzestatue von Marshall Daugherty zu Ehren von John Wesley, Gr√ºnder des Methodismus.	[80, 80, 60]	73.3333	[0.06556384925051524, 1.0636577994409213, -2.8454232045315577]	-0.5720671852800404	-0.22056785225868225
929	Bullets struck the cockpit's canopy, showering Crum and his navigator, Rhodesian Alan Dedman, with shards of Perspex.	Die Kugeln schlugen den Baldachin des Cockpits, der Crum und seinen Navigator Rhodesian Alan Dedman mit Scherben Plexiglas duschte.	[67, 73, 80]	73.3333	[-2.102528091085145, -0.49690580123975703, -0.04441756016769294]	-0.8812838174975317	-0.44904768466949463
1383	These two psychological types Jung compares to ancient archetypes, Apollo and Dionysus.	Diese beiden psychologischen Typen Jung vergleicht mit alten Archetypen, Apollo und Dionysos.	[90, 67, 63]	73.3333	[-0.0443348266575098, -1.2805365052188824, -1.0848726259634645]	-0.803247985946619	-0.24982967972755432
1528	Apart from appetisers, shrimps also features as toppings for some fish servings.	Neben Appetith√§ppchen, Garnelen auch als Belag f√ºr einige Fischportionen.	[91, 64, 65]	73.3333	[0.04515183701325695, -1.5657947233076184, -0.974591313304727]	-0.8317447331996961	-0.5931240320205688
1648	Annoyed Dinah paces, irritated at the soldier's suggestion.	Ver√§rgert Dinah Schritte, irritiert √ºber den Vorschlag des Soldaten.	[90, 70, 60]	73.3333	[-0.0443348266575098, -0.9952782871301464, -1.2502945949515705]	-0.7633025695797423	-0.3560502231121063
1774	This frightened the bourgeoisie and they repressed the uprising during the June Days.	Das erschreckte die Bourgeoisie und unterdr√ºckte den Aufstand w√§hrend der Junitage.	[100, 89, 92, 68, 46, 45]	73.3333	[0.2654514735602496, 0.8113570940985152, 0.1346385006840237, -0.1672172840175087, -1.0308017456860843, -0.8843807961895145]	-0.14515879292505318	-0.2829641103744507
1848	Sheridan sorted out the mess, impressing Halleck in the process.	Sheridan sortierte das Chaos und beeindruckte Halleck dabei.	[69, 83, 68]	73.3333	[-1.4193234201313905, 0.2408406579210431, -1.6115940874402417]	-0.9300256165501963	-0.3545399606227875
2660	They pleaded guilty to violating the federal Endangered Species Act.	Sie pl√§dierten f√ºr schuldig, das Bundesgesetz √ºber gef√§hrdete Arten zu verletzen.	[67, 82, 71]	73.3333	[-1.7362344833314276, 0.14575458522479776, -0.9427811157199508]	-0.8444203379421936	-0.37728485465049744
3275	Keladi Chennamma fought against Bijapur Sultanate and defying Mughal emperor Aurangzeb.	Keladi Chennamma k√§mpfte gegen Bijapur Sultanat und trotzt Moghul Kaiser Aurangzeb.	[100, 92, 84, 50, 69, 45]	73.3333	[0.2654514735602496, 0.1346385006840237, 0.33592673061728845, -0.89218775095613, -0.07426990397887885, -0.8843807961895145]	-0.18580362437716025	-0.13302433490753174
3294	U.S. Department of Agriculture, Agriculture Handbook 445.	U.S. Department of Agriculture, Agriculture Handbook 445.	[100, 92, 93, 60, 50, 45]	73.3333	[0.2654514735602496, 0.1346385006840237, 1.1917013848834965, -0.48942638043467374, -0.8644483819109182, -0.8843807961895145]	-0.10774403323455607	-0.18428747355937958
4209	Calcitonin is produced by parafollicular cells in the thyroid gland, and can bind to receptors on osteoclasts to directly inhibit osteoclast activity.	Calcitonin wird von parafollicul√§ren Zellen in der Schilddr√ºse produziert und kann an Rezeptoren an Osteoklasten binden, um die Osteoklast-Aktivit√§t direkt zu hemmen.	[74, 75, 71]	73.3333	[-0.614933996345165, -0.05103048675956321, -1.1024123569313533]	-0.5894589466786938	-0.24893812835216522
4932	The Manila Bulletin lauded the book as "a worthy forerunner to Zafon‚Äôs bestsellers".	Das Manila Bulletin lobte das Buch als "ein w√ºrdiger Vorreiter zu Zafon Tests Bestsellern".	[92, 100, 87, 51, 52, 58]	73.3333	[1.0966153121872513, 0.2654514735602496, -0.31279481766981004, -0.8519116139039844, -0.7812717000233351, -0.4156498537470967]	-0.16659353326612092	-0.42048171162605286
5927	They flew to Tsili Tsili Airfield on 23 and 24 August.	Sie flogen am 23. und 24. August zum Tsili Tsili Flugplatz.	[80, 74, 66]	73.3333	[-0.9392014633651773, -0.44144059250339074, -1.3756225779151277]	-0.9187548779278986	-0.2332039624452591
6051	After twisting his ankle in avoiding the gunfire, he stalked and killed the paratrooper with a shot to the head.	Nachdem er seinen Kn√∂chel verdreht hatte, um das Schussfeuer zu vermeiden, stie√ü er an und t√∂tete den Fallschirmj√§ger mit einem Schuss auf den Kopf.	[100, 79, 98, 45, 68, 50]	73.3333	[0.2654514735602496, -0.13950363286393827, 0.6715584827086242, -1.093568436216858, -0.11585824492267038, -0.7040996644808922]	-0.1860033370359142	-0.4041917324066162
6120	Livid at being disturbed, Kapila sears them with his angry gaze, reduces them to ashes, and dispatches them to the netherworld.	Wenn Kapila gest√∂rt ist, n√§ht er sie mit seinem zornigen Blick, reduziert sie auf Asche und schickt sie in die Unterwelt.	[72, 78, 70]	73.3333	[-0.9439568253313346, -0.23458970556018363, -1.1657187729600478]	-0.7814217679505221	-0.4421784579753876
74	In 1943, he mounted Operation Longcloth by the 77th Indian Infantry Brigade.	1943 wurde er von der 77. Indischen Infanterie-Brigade zur Operation LongTuch ernannt.	[100, 100, 78, 50, 68, 45]	73.5	[0.2654514735602496, 0.37321150863630664, -0.23458970556018363, -0.89218775095613, -0.11585824492267038, -0.8843807961895145]	-0.24805891923865706	-0.6341597437858582
880	Exiting the chicane at the end of the backstretch, Sharp spun into a tire barrier, damaging the rear wing.	Beim Verlassen der Schikane am Ende des R√ºckens drehte sich Sharp in eine Reifenschranke und besch√§digte den Heckfl√ºgel.	[100, 87, 86, 51, 67, 50]	73.5	[0.2654514735602496, -0.31279481766981004, 0.5260988760097791, -0.8519116139039844, -0.15744658586646193, -0.7040996644808922]	-0.20578372205852	-0.4621298909187317
4638	Luaka Bop Records repackaged the first Crammed Discs release for American listeners in 1993 as Adventures in Afropea 1.	Luaka Bop Records hat 1993 das erste Crammed Discs Release f√ºr amerikanische H√∂rer als Adventures in Afropea 1 neu verpackt.	[93, 92, 91, 50, 55, 60]	73.5	[1.1917013848834965, -0.4833434386410839, 0.04515183701325695, -0.89218775095613, -0.6565066771919604, -0.3435374010636478]	-0.18978700765934478	-0.3274518847465515
78	Harris, Jonathan, Byzantium and the Crusades, Bloomsbury, 2nd ed., 2014.	Harris, Jonathan, Byzanz and the Crusades, Bloomsbury, 2nd ed., 2014.	[79, 68, 74]	73.6667	[-1.7001351709682508, -1.4703928161015605, -1.4761214453897777]	-1.54888e+16	-0.10531815141439438
245	In 1011, Mahmud despatched an expedition to conquer Ghur under Altuntash, governor of Herat, and Arslan Hajib, governor of Tus.	1011 schickte Mahmud eine Expedition, um Gur unter Altuntash, dem Gouverneur von Herat, und Arslan Hajib, dem Gouverneur von Tus, zu erobern.	[74, 66, 81]	73.6667	[-2.1681319910940844, -1.894690014931446, 0.05066851252855241]	-1.33738e+16	-0.20615799725055695
255	Ferrochelatase catalyzes the joining of protoporphyrin and Fe2+ to form heme.	Ferrochelatase katalysiert die Verbindung von Protoporphyrin und Fe2 + zu Heme.	[68, 79, 74]	73.6667	[-1.4703928161015605, 0.16523189586879544, -2.1681319910940844]	-1.15776e+16	-0.21224050223827362
675	Technical director Piers Shepperd masterminded the complex change from rural to industrial during 'Pandemonium'.	Technischer Direktor Piers Shepperd beherrschte den komplexen Wechsel vom l√§ndlichen zum industriellen w√§hrend des Pandemonium.	[76, 74, 71]	73.6667	[-0.31013469893126033, -0.614933996345165, -0.9427811157199508]	-0.6226166036654587	-0.478044718503952
858	The French repulsed the Prussians with heavy losses and forced them back to Bad Schwartau.	Die Franzosen schlugen die Preu√üen mit schweren Verlusten ab und zwangen sie zur√ºck nach Bad Schwartau.	[100, 100, 78, 55, 49, 60]	73.6667	[0.2654514735602496, 0.8505318100501577, -0.23458970556018363, -0.6908070656954018, -0.9060367228547097, -0.3435374010636478]	-0.1764979352605893	-0.2786594033241272
919	In 1940, the academy stopped using Reina Mercedes as a brig for disciplining midshipmen, and restricted them to Bancroft Hall, instead.	1940 stoppte die Akademie Reina Mercedes als Brig zur Disziplinierung von Midshipmen und beschr√§nkte sie stattdessen auf Bancroft Hall.	[75, 75, 71]	73.6667	[-0.5198479236489196, -0.05103048675956321, -1.1024123569313533]	-0.5577635891132787	-0.40527379512786865
1131	sank 7 November 1944, after hitting a mine off Ostend.	sank am 7. November 1944, nachdem eine Mine vor Ostende getroffen.	[74, 80, 67]	73.6667	[-2.1681319910940844, -0.04441756016769294, -1.0966875488312204]	-1.10308e+16	-0.48430317640304565
1161	After defeating a new Haitian invasion in 1849, Santana marched on Santo Domingo and deposed Jimenes in a coup d'√©tat.	Nach dem Sieg √ºber eine neue haitianische Invasion 1849 marschierte Santana √ºber Santo Domingo und legte Jimenes in einem Staatsstreich ab.	[77, 74, 70]	73.6667	[-0.32967577825642896, -0.27396814399966013, -1.2608678885313718]	-0.6215039369291536	-0.2699418365955353
1308	The Gurkha takes cover behind a tent as the 2 legionnaires unload the rest of their ammo at the retreating Gurkhas.	Der Gurkha nimmt Deckung hinter einem Zelt, w√§hrend die 2 Legion√§re den Rest ihrer Munition an den zur√ºckziehenden Gurkhas entladen.	[86, 78, 57]	73.6667	[-0.4022814813405768, -0.23458970556018363, -1.4157165639396765]	-0.6841959169468123	-0.3130842447280884
1331	Galactus imbues him with a portion of the Power Cosmic, transforming him into the Silver Surfer.	Galactus durchdringt ihn mit einem Teil der Macht Kosmische, verwandelt ihn in die Silber Surfer.	[64, 84, 73]	73.6667	[-1.899610089206723, 0.9575095538688884, -0.49690580123975703]	-0.4796687788591972	-0.360891193151474
1606	Furthermore, the oxytocin levels of the couples correlate positively; when the oxytocin secretion of one increases the other one also increases.	Dar√ºber hinaus korrelieren die Oxytocin-Spiegel der Paare positiv; wenn die Oxytocin-Sekretion des einen erh√∂ht, erh√∂ht sich auch der andere.	[89, 72, 60]	73.6667	[-0.13382149032827656, -0.8051061417376557, -1.2502945949515705]	-0.7297407423391675	-0.35149887204170227
1709	From the 16th century onward, civil strife and frequent political infighting engulfed much of Vietnam.	Seit dem 16. Jahrhundert verschlungen B√ºrgerkriege und h√§ufige politische Auseinandersetzungen einen Gro√üteil Vietnams.	[80, 67, 74]	73.6667	[0.06556384925051524, -1.2805365052188824, -2.1681319910940844]	-1127701549020810	-0.4382484257221222
1735	Regiment reorganized 25 July 1945 wholly as infantry, but retained cavalry designations.	Regiment reorganisiert 25 Juli 1945 ganz als Infanterie, sondern behielt Kavallerie Bezeichnungen.	[74, 81, 66]	73.6667	[-2.1681319910940844, -0.8497147996944105, -1.6850014526541417]	-1.56762e+16	-0.31866583228111267
1811	It favored the traditional cavalry attack in two ranks of horsemen armed with sabers or lances.	Es beg√ºnstigte die traditionelle Kavallerie Angriff in zwei Reihen von Reitern mit S√§beln oder Lanzen bewaffnet.	[74, 72, 75]	73.6667	[-0.614933996345165, -0.719843458479854, -0.4685902305312789]	-0.6011225617854326	-0.25414395332336426
1878	He graduated from Harvard summa cum laude in 1916 and then served in World War I as an ensign in the Navy.	Er absolvierte Harvard summa cum laude im Jahr 1916 und diente dann im Ersten Weltkrieg als F√§hnrich in der Marine.	[79, 74, 68]	73.6667	[-1.7001351709682508, -0.614933996345165, -0.7760070199361482]	-1030358729083180	-0.3291996121406555
3128	With the submarine now readily visible, and her stern tubes dry, Thresher dove as bullets from the approaching escort splashed nearby.	Mit dem U-Boot nun gut sichtbar, und ihre Heckrohre trocken, Thresher Taube als Kugeln aus der nahenden Eskorte spritzte in der N√§he.	[74, 78, 69]	73.6667	[-0.3802703256529918, 0.6177824849607275, -1.4193234201313905]	-0.39393708694121826	-0.330485463142395
3224	Tzara nonetheless rebelled against his birthplace and upbringing.	Dennoch rebellierte Tzara gegen seinen Geburtsort und seine Erziehung.	[74, 69, 78]	73.6667	[-2.1681319910940844, -1.4193234201313905, 0.6177824849607275]	-0.9898909754215824	-0.30908793210983276
3714	During his pontificate, petitions increased requesting the dogmatization of the Immaculate Conception.	W√§hrend seines Pontifikats vermehrten sich die Petitionen, um die Dogmatisierung der Unbefleckten Empf√§ngnis zu fordern.	[80, 78, 63]	73.6667	[-1.6065358069430842, 0.006776364268776851, -1.4345037437367685]	-1.01142e+16	-0.33431383967399597
4155	Prints consist of paper coated with an emulsion of silver halide in gelatin.	Die Drucke bestehen aus Papier, das mit einer Emulsion aus Silberhalogenid in Gelatine beschichtet ist.	[80, 74, 67]	73.6667	[-0.04441756016769294, -1.4761214453897777, -1.181227721089917]	-0.9005889088824626	-0.2931085228919983
4287	It just remains loose philosophical talk, sophistry or petitio principii, uncommitted to any particular consequence.	Es bleibt nur lose philosophische Rede, Sophisterei oder petitio principii, unverpflichtet, jede bestimmte Konsequenz.	[86, 64, 71]	73.6667	[0.5260988760097791, -1.899610089206723, -1.1024123569313533]	-0.8253078567094324	-0.38982102274894714
4792	Pookie Hudson, 72, American lead singer of The Spaniels, complications of thymus cancer.	Pookie Hudson, 72, amerikanische Haupts√§ngerin von The Spaniels, Komplikationen von Thymuskrebs.	[100, 100, 75, 68, 49, 50]	73.6667	[0.2654514735602496, 0.8505318100501577, -0.5198479236489196, -0.1672172840175087, -0.9060367228547097, -0.7040996644808922]	-0.1968697185652705	-0.2468101978302002
4902	A North Sea landfall culminated near the Essex coast near the Thames Estuary.	Ein Nordsee-Landfall gipfelte in der N√§he der Essex K√ºste in der N√§he der Themse Estuary.	[77, 86, 58]	73.6667	[-0.32967577825642896, -0.4022814813405768, -1.6928441777844876]	-0.8082671457938311	-0.3678956627845764
5489	Flood, Forsch, Kissell and Simmons announced as new Cardinals Hall of Fame inductees	Flut, Forsch, Kissell und Simmons als neue Kardin√§le Hall of Fame induziert	[100, 100, 90, 68, 44, 40]	73.6667	[0.2654514735602496, 0.37321150863630664, 0.9064431667947606, -0.1672172840175087, -1.1139784275736675, -1.0646619278981369]	-0.13345858174966607	-0.2928627133369446
5710	In the 2010 census, Malays of Javanese descent numbered 89,000.	In der Volksz√§hlung 2010 z√§hlten die Malaien javanischer Abstammung 89.000.	[68, 80, 73]	73.6667	[-1.4703928161015605, 0.323687427468814, -0.49690580123975703]	-0.5478703966241678	-0.35866791009902954
6104	After the battle Zeus finally relented his aid and hurled Tityos down to Tartarus.	Nach der Schlacht erfreute sich Zeus endlich seiner Hilfe und schleuderte Tityos nach Tartarus hinab.	[74, 67, 80]	73.6667	[-2.1681319910940844, -0.8317690981739914, 0.323687427468814]	-0.892071220599754	-0.38666579127311707
80	Some disaffiliated along with Roman Catholics and other Christian groups in the wake of modern secularization.	Einige waren im Gefolge der modernen S√§kularisierung zusammen mit Katholiken und anderen christlichen Gruppen desillusioniert.	[69, 78, 75]	74	[-1.4193234201313905, -0.23458970556018363, -0.05103048675956321]	-0.5683145374837124	-0.5418350696563721
103	In another, he claimed that Sharmell had "molested" him and "fondled his privates".	In einem anderen behauptete er, Sharmell habe ihn "bel√§stigt" und "seine Privaten gefesselt".	[66, 82, 74]	74	[-1.6850014526541417, 0.6405984906688512, -2.1681319910940844]	-1.07084e+16	-0.41530564427375793
1527	A bibliography of the economic impacts of naturism	Eine Bibliographie der √∂konomischen Auswirkungen des FKK	[80, 71, 71]	74	[-0.04441756016769294, -0.9427811157199508, -1.1024123569313533]	-0.6965370109396657	-0.3781653940677643
1690	one of Silverberg's superior performances"; although he faulted the climax as "arbitrary, almost perfunctory."	eine von Silverbergs √ºberlegenen Leistungen "; obwohl er den H√∂hepunkt als" willk√ºrlich, fast perfektion√§r "bem√§ngelte.	[74, 80, 68]	74	[-2.1681319910940844, 1.0636577994409213, -1.577778951731409]	-0.8940843811281907	-0.45203113555908203
2395	The bulbus arteriosus connects to the aorta, through which blood flows to the gills for oxygenation.	Der Bulbus arteriosus verbindet sich mit der Aorta, durch die Blut zur Sauerstoffversorgung in die Kiemen flie√üt.	[79, 69, 74]	74	[-0.00874184656673593, -1.0903643598263917, -2.1681319910940844]	-1.08908e+16	-0.26951470971107483
2856	Lucius Cornelius Rufinus Sulla, Flamen Dialis circa 250 BC, was the first of the Cornelii to bear the cognomen Sulla.	Lucius Cornelius Rufinus Sulla, Flamen Dialis um 250 v. Chr., war der erste Cornelii, der das Cognomen Sulla trug.	[63, 82, 77]	74	[-2.0069144074830136, 0.6405984906688512, 0.3948448277206306]	-0.32382369636451064	-0.202438086271286
3282	The river irrigates some 213000 acre of productive farmland, most of it in Stanislaus and San Joaquin Counties.	Der Fluss bew√§ssert rund 213000 Hektar Ackerland, die meisten davon in Stanislaus und San Joaquin Counties.	[67, 81, 74]	74	[-0.9004101963737501, 0.05066851252855241, -2.1681319910940844]	-1.00596e+16	-0.29892998933792114
3830	After this defeat of the K ºiche º, two Kaqchikel clans rebelled, the Akahal and the Tukuche.	Nach dieser Niederlage der K√¢ iche√¢ rebellierten zwei Kaqchikel-Clans, die Akahal und die Tukuche.	[74, 69, 79]	74	[-2.1681319910940844, -1.4193234201313905, 0.8407201422008245]	-0.9155784230082168	-0.2640233337879181
3837	In a 2013 interview with Worden, Slate found that "he‚Äôs vexed by lingering inaccuracies in the Wikipedia entry about the incidents.	In einem Interview 2013 mit Worden, Schiefer festgestellt, dass "er war √§rgerlich √ºber anhaltende Ungenauigkeiten in der Wikipedia-Eintrag √ºber die Vorf√§lle.	[66, 82, 74]	74	[-2.192014754755912, 0.14575458522479776, -0.7833038103274731]	-0.9431879932861958	-0.4245883822441101
3885	Descendants of different European ethnic groups often intermarried in Chile.	Nachkommen verschiedener europ√§ischer ethnischer Gruppen sind in Chile oft miteinander verheiratet.	[73, 74, 75]	74	[-0.45457602147024295, -0.27396814399966013, -0.4685902305312789]	-0.39904479866706066	-0.656472384929657
4029	These tightrope walkers drew huge crowds to witness their exploits.	Diese Seill√§ufer zogen riesige Menschenmengen an, um ihre Heldentaten zu erleben.	[70, 71, 81]	74	[-0.6774931089219965, -0.9427811157199508, 0.4821429590688326]	-0.37937708852437163	-0.4858137369155884
4166	On November 26, TVXQ released Humanoids, the repackage of Catch Me, which also peaked at number one.	Am 26. November ver√∂ffentlichte TVXQ Humanoids, das Repackage von Catch Me, das ebenfalls auf Platz eins stand.	[79, 64, 79]	74	[-0.13950363286393827, -0.9990553328875208, -0.20262212469356555]	-0.4470603634816748	-0.3741643726825714
4218	Then came the Italian carpenter and finally the mason and the bricklayer	Dann kam der italienische Tischler und schlie√ülich der Maurer und der Maurer	[100, 100, 100, 51, 48, 45]	74	[0.2654514735602496, 0.8505318100501577, 0.37321150863630664, -0.8519116139039844, -0.9476250637985012, -0.8843807961895145]	-0.19912044694088102	-0.2464718073606491
4329	G2, then under the Team Kinguin banner, placed fifth at the previous major, losing to TSM in the quarterfinals.	G2, dann unter dem Team Kinguin Banner, belegte den f√ºnften Platz im vorherigen Major und verlor TSM im Viertelfinale.	[80, 79, 63]	74	[-0.9392014633651773, -0.13950363286393827, -1.0848726259634645]	-0.7211925740641933	-0.43519189953804016
4924	The labium still lies beneath the other mouthparts, but also enfolds them, and it has been extended into a proboscis.	Das Labium liegt immer noch unter den anderen Mundteilen, umschlie√üt sie aber auch, und es ist zu einer Wahrscheinlichkeit ausgeweitet worden.	[78, 74, 70]	74	[-0.23458970556018363, -0.27396814399966013, -1.2608678885313718]	-0.5898085793637385	-0.5323578715324402
5241	Louisiana Polytechnic Institute became desegregated in the 1960s.	Louisiana Polytechnic Institute wurde in den 1960er Jahren desegregated.	[83, 74, 65]	74	[0.7990540222688698, -1.802557914408088, -3.0105262673205844]	-1.33801e+16	-0.18818983435630798
5371	The college, with its deanery and prebends, was increasingly proving a straitjacket for the Anglican Church in Wolverhampton.	Das College erwies sich mit seinem Dekanat und seinen Prebends zunehmend als Zwangsjacke f√ºr die anglikanische Kirche in Wolverhampton.	[100, 78, 100, 51, 65, 50]	74	[0.2654514735602496, -0.23458970556018363, 0.8505318100501577, -0.8519116139039844, -0.24062326775404502, -0.7040996644808922]	-0.15254016134811632	-0.3678407371044159
6053	They rigged parachutes for dropping weapons to insurgents in Indonesia.	Sie manipulierten Fallschirme, um Waffen an Aufst√§ndische in Indonesien abzulegen.	[90, 65, 67]	74	[-0.0443348266575098, -0.9913319880093451, -1.2805365052188824]	-0.7720677732952458	-0.3111226558685303
6226	In September 1933, the Sergeants' Revolt, led by Sergeant Fulgencio Batista, overthrew Cespedes.	Im September 1933 st√ºrzte der Sergeantenaufstand unter der F√ºhrung des Sergeanten Fulgencio Batista Cespedes.	[71, 81, 70]	74	[-1.1024123569313533, 0.05066851252855241, -1.1657187729600478]	-0.7391542057876163	-0.24007593095302582
6268	During the sortie, Johnson destroyed a solitary Messerschmitt Bf 109.	W√§hrend der Sortie zerst√∂rte Johnson eine einsame Messerschmitt Bf 109.	[82, 74, 66]	74	[0.6405984906688512, -1.802557914408088, -0.9747158921910012]	-0.7122251053100794	-0.2361069917678833
6414	On 15 April 1986, U.S. Air Force and Navy planes bombed Benghazi and Tripoli.	Am 15. April 1986 bombardierten US Air Force und Navy Flugzeuge Benghazi und Tripolis.	[100, 100, 73, 45, 56, 70]	74	[0.2654514735602496, 0.37321150863630664, -0.7100200690414104, -1.093568436216858, -0.6149183362481689, 0.017024862353596727]	-0.29380316615938074	-0.23589886724948883
6524	MARC trains serve commuters in the eastern panhandle.	MARC Z√ºge dienen Pendlern im √∂stlichen Panhandle.	[81, 74, 67]	74	[0.4821429590688326, -1.802557914408088, -0.9004101963737501]	-0.7402750505710017	-0.46554210782051086
6638	The formation of a supercontinent insulates the mantle.	Die Bildung eines Superkontinents isoliert den Mantel.	[70, 74, 78]	74	[-1.2608678885313718, -1.802557914408088, -0.08304754238398711]	-1048824448441140	-0.186221182346344
6675	The Ottomans finalized their domination over Phocis and Delphi in about 1410CE.	Die Osmanen beendeten ihre Herrschaft √ºber Phocis und Delphi um 1410n. Chr..	[79, 74, 69]	74	[-0.13950363286393827, -1.4761214453897777, -0.720244941698305]	-0.7786233399840071	-0.3004753887653351
6745	Raptors include a variety of hawks, a variety of owls, and gyrfalcons, as well as the abundant but striking golden eagles.	Raptoren umfassen eine Vielzahl von Falken, eine Vielzahl von Eulen und Kirschfalken, sowie die reichlich vorhanden, aber auffallend goldenen Adler.	[74, 69, 79]	74	[-2.1681319910940844, -1.3886564302001447, -0.13950363286393827]	-1.2321e+16	-0.4356878697872162
6957	Species of grouper include the black, comet, gag, giant, Goliath, Nassau, saddletail, tiger, Warsaw, white and yellowfin grouper.	Arten von Zackenbarsch geh√∂ren die schwarze, Komet, Gag, Riese, Goliath, Nassau, Sattelschnecke, Tiger, Warschau, wei√ü und Gelbflossen Zackenbarsch.	[74, 69, 79]	74	[-2.1681319910940844, -1.3886564302001447, -1.028688127035944]	-1.52849e+16	-0.3348272740840912
222	Secondary Mortgage Markets, GSEs, and the Changing Cyclicality of Mortgage Flows.	Sekund√§re Hypothekenm√§rkte, GSEs und die sich ver√§ndernde Zyklizit√§t der Hypothekenfl√ºsse.	[71, 67, 85]	74.3333	[-0.9001922144339011, -2.102528091085145, 0.17194831010718536]	-0.943590665137287	-0.3551325500011444
260	Chris Berman nicknamed them "the pirates in pewter pants," a play on the Gilbert and Sullivan opera The Pirates of Penzance.	Chris Berman nannte sie "die Piraten in Zinnhosen", ein St√ºck √ºber die Gilbert und Sullivan Oper The Pirates of Penzance.	[100, 74, 81, 60, 66, 65]	74.3333	[0.2654514735602496, -0.614933996345165, -0.8497147996944105, -0.48942638043467374, -0.19903492681025348, -0.16325626935502552]	-0.34181914984654643	-0.2441144585609436
491	There, they met the British Channel Fleet of eight battleships and four armored cruisers.	Dort trafen sie die britische Kanalflotte mit acht Schlachtschiffen und vier Panzerkreuzern.	[73, 80, 70]	74.3333	[-0.7100200690414104, -0.18274099678607322, -1.2608678885313718]	-0.7178763181196185	-0.32984253764152527
784	At Miller's bedside, Church negotiated Miller's resignation.	Am Bett Millers verhandelte Kirche Millers R√ºcktritt.	[79, 58, 86]	74.3333	[0.16523189586879544, -2.2218650169943994, -0.4022814813405768]	-0.8196382008220602	-0.35453760623931885
848	When racing resumed, Davidson and the Audi duo of McNish of di Grassi overtook Lapierre to demote him to fifth.	Als das Rennen wieder aufgenommen wurde, √ºberholten Davidson und das Audi Duo McNish von di Grassi Lapierre auf Platz f√ºnf.	[71, 65, 87]	74.3333	[-1.1024123569313533, -1.6419599044306112, -0.31279481766981004]	-1.01906e+16	-0.3034244477748871
1133	He pursued Bukka throughout his dominions and the slaughtered no less than 400,000 Hindus around Vijaynagara.	Er verfolgte Bukka w√§hrend seiner Herrschaft und die schlachteten nicht weniger als 400.000 Hindus rund um Vijaynagara.	[70, 75, 78]	74.3333	[-0.6774931089219965, -0.05103048675956321, 0.006776364268776851]	-0.24058241047092765	-0.3409077227115631
1542	The keel was a flattened plank about twice as thick as a normal strake plank but still not strong enough to withstand the downwards thrust of a mast.	Der Kiel war eine abgeflachte Planke etwa doppelt so dick wie eine normale Streckenplatte, aber immer noch nicht stark genug, um dem Abw√§rtsschub eines Mastes standzuhalten.	[72, 79, 72]	74.3333	[-0.9439568253313346, -0.13950363286393827, -0.719843458479854]	-0.6011013055583757	-0.3377622961997986
2097	Thus, they already objected to Nkrumah's dismissal of British officers in 1961.	So lehnten sie bereits 1961 die Entlassung britischer Offiziere durch Nkrumah ab.	[81, 76, 66]	74.3333	[0.13986954506776642, 0.1719071704805337, -1.894690014931446]	-0.5276377664610487	-0.30755719542503357
2215	Warner Bros. produced wartime cartoons which constantly parodied Hitler and his personality traits and quirks.	Warner Bros. produzierte Kriegszeichentrickfilme, die Hitler und seine Pers√∂nlichkeitsmerkmale und Merkw√ºrdigkeiten st√§ndig parodierten.	[75, 78, 70]	74.3333	[-0.5198479236489196, 0.6177824849607275, -1.2608678885313718]	-0.3876444424065213	-0.4039468765258789
2599	Democrats, desirous to defeat Crittenden and embarrass the Whigs, pledged to vote against him at all costs, even if it meant electing Dixon.	Demokraten, die Crittenden besiegen und die Whigs in Verlegenheit bringen wollten, verpflichteten sich, um jeden Preis gegen ihn zu stimmen, auch wenn es bedeutete, Dixon zu w√§hlen.	[72, 81, 70]	74.3333	[-0.8051061417376557, -0.0754366785097826, -1.2608678885313718]	-0.7138035695929368	-0.274756520986557
2885	The Thunderbolts' past crimes are erased on the condition that they retire from costumed heroics.	Die Verbrechen der Thunderbolts in der Vergangenheit werden unter der Bedingung ausgel√∂scht, dass sie sich von kost√ºmierten Heldentaten zur√ºckziehen.	[75, 73, 75]	74.3333	[-1.386634781719011, -0.49690580123975703, -0.5198479236489196]	-0.8011295022025625	-0.2942323386669159
2989	If it is fertilized by a sperm, the secondary oocyte promptly matures into an ootid and then becomes a mature ovum.	Wenn es von einem Sperma befruchtet wird, reift die sekund√§re Eizelle sofort zu einer Eizelle und wird dann zu einer reifen Eizelle.	[79, 74, 70]	74.3333	[-0.13950363286393827, -0.27396814399966013, -1.2608678885313718]	-0.5581132217983233	-0.3399547040462494
4463	It aired on December 30, 2013 on Discovery Channel.	Es ausgestrahlt am 30. Dezember 2013 auf Discovery Channel.	[64, 88, 71]	74.3333	[-1.899610089206723, 1.5913316802689625, -0.9427811157199508]	-0.4170198415525704	-0.2898756265640259
4678	At the crest the chasseurs came upon the battery that had caused severe casualties on the 1st and 2nd/3rd Chasseurs.	Am Kamm stie√üen die Chasseuren auf die Batterie, die bei der 1. und 2. / 3. Chasseurs schwere Opfer gefordert hatte.	[100, 100, 75, 60, 66, 45]	74.3333	[0.2654514735602496, 0.8505318100501577, -0.5198479236489196, -0.48942638043467374, -0.19903492681025348, -0.8843807961895145]	-0.16278445724549231	-0.51578688621521
4772	Darby Creek joins the Delaware River 85.28 mi upriver of its mouth.	Darby Creek verbindet den Delaware River 85.28 mi flussaufw√§rts seiner M√ºndung.	[82, 81, 60]	74.3333	[-0.7602281360236438, 0.05066851252855241, -1.2502945949515705]	-0.6532847394822207	-0.36187219619750977
5069	Aarne Arvonen, 111, Finnish supercentenarian, last surviving veteran of the Finnish Civil War.	Aarne Arvonen, 111, finnischer Supercentenarian, letzter √ºberlebender Veteran des finnischen B√ºrgerkrieges.	[83, 100, 92, 51, 50, 70]	74.3333	[0.2408406579210431, 0.2654514735602496, 0.1346385006840237, -0.8519116139039844, -0.8644483819109182, 0.017024862353596727]	-0.17640075021599824	-0.26036882400512695
5350	In the nearby island of Bohol, a babaylan spiritualist named Tamblot rebelled against Jesuit hamletting around 1622.	Auf der nahegelegenen Insel Bohol rebellierte ein babaylanischer Spiritualist namens Tamblot gegen Jesuiten, die um 1622 im Dorf lagen.	[100, 96, 79, 51, 70, 50]	74.3333	[0.2654514735602496, 0.4925851553670907, -0.13950363286393827, -0.8519116139039844, -0.032681563035087305, -0.7040996644808922]	-0.16169330755942699	-0.4273703396320343
6344	Ba·∏•ya borrows from Sufism and Jewish Kalam integrating them into Neoplatonism.	BaFahya entlehnt sich dem Sufismus und dem j√ºdischen Kalam, sie in den Neoplatonismus zu integrieren.	[82, 82, 59]	74.3333	[0.6405984906688512, -1.1330903996251973, -1.4948557629117594]	-0.6624492239560351	-0.2998112142086029
6570	Under the artillery cover, the PAVN sappers, some dressed in ARVN uniforms, moved into the buildings south of Kontum Airfield.	Unter der Artilleriedecke zogen die PAVN-Splitter, teilweise in ARVN-Uniformen gekleidet, in die Geb√§ude s√ºdlich des Flugplatzes Kontum.	[72, 77, 74]	74.3333	[-0.8051061417376557, 0.3948448277206306, -0.6270457621312975]	-0.34576902538277415	-0.3967490494251251
4437	Ford Elite Ford Ranchero Mercury Comet Mercury Cougar Mercury Cyclone Mercury Montego Starsky & Hutch Gran Torino, a 2008 Clint Eastwood film Turin	Ford Elite Ford Ranchero Mercury Comet Mercury Cougar Mercury Cyclone Mercury Montego Starsky & Hutch Gran Torino, ein Clint Eastwood Film Turin 2008	[100, 100, 100, 40, 40, 67]	74.5	[0.2654514735602496, 0.8505318100501577, 0.37321150863630664, -1.2949491214775863, -1.2803317913488337, -0.09114381667157663]	-0.19620498954188045	-0.12259387224912643
5112	She throws a log in a pond distracting the henchmen.	Sie wirft ein Log in einen Teich, der die Schergen ablenkt.	[100, 84, 95, 70, 48, 50]	74.5	[0.2654514735602496, -0.5812548086821103, 1.3818735302759872, -0.08666500991321746, -0.9476250637985012, -0.7040996644808922]	-0.11205325717308073	-0.36966732144355774
132	Unfortunately Slicht Othrusa only survives as a fragment.	Leider √ºberlebt Slicht Othrusa nur als Fragment.	[69, 80, 75]	74.6667	[-1.0903643598263917, 0.323687427468814, -2.0745326270689177]	-0.9470698531421652	-0.1856650561094284
285	Irritation of nerve endings within the nasal passages or airways, can induce a cough reflex and sneezing.	Reizung von Nervenenden innerhalb der Naseng√§nge oder Atemwege, kann einen Hustenreflex und Niesen induzieren.	[81, 68, 75]	74.6667	[0.4821429590688326, -1.4703928161015605, -2.0745326270689177]	-1.02093e+16	-0.3427237272262573
434	Blinded by the dense smoke, Hartford and Albatross ran aground on the eastern shore beneath the Rebel batteries.	Geblendet durch den dichten Rauch liefen Hartford und Albatross am Ostufer unter den Batterien der Rebellen auf Grund.	[75, 81, 68]	74.6667	[-2.0745326270689177, 0.05066851252855241, -1.1243814481238537]	-1.04942e+16	-0.37298521399497986
1034	The hurricane then struck Sint Maarten and the British Virgin Islands on September 6 and later crossed Little Inagua in the Bahamas on September 8.	Der Hurrikan traf Sint Maarten und die Britischen Jungferninseln am 6. September und √ºberquerte sp√§ter Little Inagua auf den Bahamas am 8. September.	[80, 73, 71]	74.6667	[0.323687427468814, -0.7100200690414104, -0.9427811157199508]	-0.4430379190975157	-0.28333452343940735
1164	He coached Navy fencers in intercollegiate competition between 1896 and 1914.	Zwischen 1896 und 1914 trainierte er Marinefechter im interkollegialen Wettkampf.	[77, 70, 77]	74.6667	[-0.15735323820123828, -1.1657187729600478, -0.15167916733124173]	-0.49158372616417595	-0.42871206998825073
1370	Armed with a Kryptonite shard, Atom proceeds to knock out Superman using the shard.	Mit einem Kryptonit-Splitter bewaffnet, schl√§gt Atom Superman mit dem Splitter aus.	[76, 78, 70]	74.6667	[-0.4247618509526743, 0.6177824849607275, -1.2608678885313718]	-0.3559490848411062	-0.4243483245372772
1375	Jackson's peculiar personal traits contributed to his unpopularity as an educator.	Jacksons eigenartige pers√∂nliche Eigenschaften trugen zu seiner Unbeliebtheit als Erzieher bei.	[75, 80, 69]	74.6667	[-2.0745326270689177, 0.323687427468814, -1.9235547637436115]	-1.2248e+16	-0.2999795079231262
1459	She married David on September 23, 1885, in Lecompton, Kansas, on the campus of their alma mater, Lane University.	Sie heiratete David am 23. September 1885 in Lecompton, Kansas, auf dem Campus ihrer alma mater, Lane University.	[74, 75, 75]	74.6667	[-0.3802703256529918, -0.05103048675956321, -0.4685902305312789]	-0.29996368098127796	-0.1609753668308258
1895	When he overcomes the golem, he finds the phylactery in its center.	Als er das Golem √ºberwindet, findet er die Phylactery in seiner Mitte.	[75, 81, 68]	74.6667	[-1.386634781719011, 0.05066851252855241, -1.1243814481238537]	-0.8201159057714374	-0.41009530425071716
2003	The initial tropical disturbance formed on November 30 in the wake of Kim near the International Dateline.	Die anf√§ngliche tropische St√∂rung bildete sich am 30. November im Gefolge Kim in der N√§he der internationalen Dateline.	[75, 80, 69]	74.6667	[-2.0745326270689177, 0.323687427468814, -0.9444804263170459]	-0.8984418753057165	-0.3665439784526825
2282	On November 8, 29W made landfall over the Malay Peninsula, before dissipating soon afterward.	Am 8. November landete 29W √ºber der Malaiischen Halbinsel, bevor sie bald darauf abfuhr.	[75, 82, 67]	74.6667	[-2.0745326270689177, 0.14575458522479776, -0.8317690981739914]	-0.9201823800060372	-0.4988333582878113
2325	Multiplying any two Pauli matrices always yields a quaternion unit matrix, all of them except for ‚àí1.	Bei der Multiplikation zweier Pauli-Matrizen ergibt sich immer eine Quaternion-Unit-Matrix, mit Ausnahme von ‚àí 1.	[100, 95, 91, 51, 48, 63]	74.6667	[0.2654514735602496, 1.3818735302759872, 0.04515183701325695, -0.8519116139039844, -0.9476250637985012, -0.23536872203847442]	-0.057071426481911054	-0.3740628659725189
2494	By 1940, firefighters known as smokejumpers would parachute out of airplanes to extinguish flames in remote locations.	Bis 1940 w√ºrden Feuerwehrleute, die als R√§ucherjumper bekannt sind, aus Flugzeugen Fallschirmspringen, um Flammen an abgelegenen Orten zu l√∂schen.	[91, 72, 61]	74.6667	[0.04515183701325695, -0.8051061417376557, -1.1951539386222017]	-0.6517027477822	-0.4204948842525482
2504	Algae can drape reefs in kaleidoscopes of colours and shapes.	Algen k√∂nnen Riffe in Kaleidoskope von Farben und Formen drapieren.	[80, 75, 69]	74.6667	[-1.6065358069430842, -0.5198479236489196, -0.720244941698305]	-0.9488762240967695	-0.22581015527248383
3623	So many Navajos joined him that they formed almost half his raiders.	So viele Navajos schlossen sich ihm an, dass sie fast die H√§lfte seiner Raider bildeten.	[75, 81, 68]	74.6667	[-2.0745326270689177, 0.05066851252855241, -1.1243814481238537]	-1.04942e+16	-0.26007333397865295
3680	Zalophus, Eumetopias and Otaria diverged next, with the latter colonizing the coast of South America.	Zalophus, Eumetopien und Otaria divergierten weiter, wobei letztere die K√ºste S√ºdamerikas kolonisierten.	[100, 100, 82, 51, 65, 50]	74.6667	[0.2654514735602496, 0.8505318100501577, 0.14575458522479776, -0.8519116139039844, -0.24062326775404502, -0.7040996644808922]	-0.08914944621728611	-0.3580242991447449
3719	Over 200 warships were sunk, ranging from many auxiliaries and destroyers to one battleship and no fewer than eight carriers.	√úber 200 Kriegsschiffe wurden versenkt, von vielen Hilfskr√§ften und Zerst√∂rern bis zu einem Schlachtschiff und nicht weniger als acht Tr√§gern.	[75, 81, 68]	74.6667	[-1.386634781719011, 0.05066851252855241, -1.2825018599364992]	-0.872822709708986	-0.2750117778778076
3774	The Mittelland Canal passes over the Weser on a double aqueduct.	Der Mittelland-Kanal f√ºhrt √ºber die Weser auf einem Doppelaqu√§dukt.	[73, 70, 81]	74.6667	[-0.45457602147024295, -1.1657187729600478, 0.4821429590688326]	-0.37938394512048607	-0.4912112355232239
3827	Champavati Temple enshrines an idol of Goddess Mahisasuramardini, the avatar of Goddess Durga.	Champavati Tempel verankert ein Idol der G√∂ttin Mahisasuramardini, der Avatar der G√∂ttin Durga.	[75, 68, 81]	74.6667	[-2.0745326270689177, -1.6115940874402417, 0.05066851252855241]	-1.21182e+16	-0.14905239641666412
4027	Like a Prayer courted heavy criticism due to its religious, sexual, and racially oriented imagery.	Like a Prayer wurde wegen seiner religi√∂sen, sexuellen und rassistisch orientierten Bildsprache heftig kritisiert.	[77, 77, 70]	74.6667	[-0.15735323820123828, 0.3948448277206306, -1.2608678885313718]	-0.3411254330039932	-0.3973272740840912
4031	A disgusted Holly warns Cindy but Cindy refuses to believe her and marries Dirk.	Ein angewiderter Holly warnt Cindy, aber Cindy weigert sich ihr zu glauben und heiratet Dirk.	[83, 59, 82]	74.6667	[0.2408406579210431, -2.436131680588176, 0.6405984906688512]	-0.5182308439994273	-0.28003665804862976
4403	Julius Secundus Florus, an orator and friend of Quintilian, and nephew of the Gallic orator.	Julius Secundus Florus, ein Redner und Freund von Quintilian und Neffe des gallischen Orators.	[77, 71, 76]	74.6667	[-0.15735323820123828, -0.9427811157199508, -0.31013469893126033]	-0.4700896842841498	-0.23403270542621613
4625	MLBPipeline.com ranks him the #3 pitching prospect in baseball, and #14 overall.	MLBPipeline.com z√§hlt ihn die # 3 Pitching Aussicht in Baseball, und # 14 insgesamt.	[75, 82, 67]	74.6667	[-2.0745326270689177, 0.6405984906688512, -2.102528091085145]	-1.17882e+16	-0.29259565472602844
5426	See electrolytic capacitor#Designing for reverse bias.	Siehe Elektrolytkondensator # Entwerfen f√ºr Reverse Bias.	[80, 76, 68]	74.6667	[0.323687427468814, -0.4247618509526743, -1.6115940874402417]	-0.5708895036413674	-0.4204692244529724
5445	Other bird species resident to the Lake District include the buzzard, dipper, peregrine and raven.	Andere Vogelarten, die im Lake District leben, sind Bussard, Dipper, Wanderv√∂gel und Raben.	[75, 80, 69]	74.6667	[-2.0745326270689177, 1.0636577994409213, -1.4193234201313905]	-0.8100660825864624	-0.43792998790740967
5508	Along the Intracoastal Waterway, many boats capsized or crashed into the seawall.	Entlang des Intracoast Waterways kentern oder st√ºrzten viele Boote in die Meereswand.	[75, 80, 69]	74.6667	[-2.0745326270689177, -0.04441756016769294, -1.0675351751577902]	-1.06216e+16	-0.4663585126399994
5684	But, during the 1830s they achieved independence from textual chronologies and relied mainly on typology and stratigraphy.	Aber w√§hrend der 1830er Jahre erreichten sie Unabh√§ngigkeit von textuellen Chronologien und st√ºtzten sich haupts√§chlich auf Typologie und Stratigraphie.	[75, 81, 68]	74.6667	[-2.0745326270689177, 0.4821429590688326, -1.026150979220333]	-0.872846882406806	-0.35574960708618164
5932	On 9 May 1942 HD Southern New York merged with HD Sandy Hook and a remnant of HD Eastern New York into the Harbor Defenses of New York.	Am 9. Mai 1942 verschmolzen HD Southern New York mit HD Sandy Hook und einem √úberrest von HD Eastern New York in die Hafenverteidigung von New York.	[87, 70, 67]	74.6667	[-0.31279481766981004, -0.6858367682838149, -1.2805365052188824]	-0.7597226970575024	-0.24620157480239868
5944	Sudha puts some flowers in the feet of Chandar bound in her dupatta.	Sudha legt Blumen in die F√º√üe von Chandar gebunden in ihre Dupatta.	[75, 74, 75]	74.6667	[-1.386634781719011, -0.614933996345165, -0.4231847500110403]	-0.8082511760250721	-0.38010627031326294
5993	Vaughan last aired on October 20, 2009, while Jackson first aired on October 27, 2009.	Vaughan zuletzt ausgestrahlt am 20. Oktober 2009, w√§hrend Jackson zum ersten Mal ausgestrahlt am 27. Oktober 2009.	[75, 82, 67]	74.6667	[-2.0745326270689177, 1.5095331139211152, -2.102528091085145]	-0.8891758680776493	-0.22873921692371368
6384	The girls wear gowns of striped fabric trimmed with bands of black, with linen chemises and partlets.	Die M√§dchen tragen Gew√§nder aus gestreiftem Stoff mit schwarzen B√§ndern getrimmt, mit Leinen Chemises und Halterungen.	[75, 69, 80]	74.6667	[-2.0745326270689177, -1.4193234201313905, -0.04441756016769294]	-1.17942e+16	-0.44563186168670654
6390	Pan American Games gold medalists for the United States	Goldmedaillengewinner der Panamerikanischen Spiele	[69, 89, 66]	74.6667	[-1.4193234201313905, -0.547306324190168, -0.9747158921910012]	-0.9804485455041866	-0.3174247741699219
6629	After a cautious 62 in his first innings, he batted again when England followed on, 181 runs behind.	Nach einer vorsichtigen 62 in seinen ersten Innings, schlug er wieder, als England folgte, 181 l√§uft hinter.	[73, 77, 74]	74.6667	[-0.785501293731316, -0.32967577825642896, -0.27396814399966013]	-0.46304840532913505	-0.48822736740112305
863	In the Battle of Wyoming in July, the Seneca were accused of slaughtering noncombatant civilians.	In der Schlacht von Wyoming im Juli wurde Seneca vorgeworfen, nichtk√§mpferische Zivilisten get√∂tet zu haben.	[100, 94, 87, 68, 55, 45]	74.8333	[0.2654514735602496, 0.3136118280255572, 0.6211849487060245, -0.1672172840175087, -0.6565066771919604, -0.8843807961895145]	-0.08464275118452537	-0.2942914664745331
3752	Volthoom overpowers Simon Baz's ring and destroys it.	Volthoom √ºberw√§ltigt Simon Baz 'Ring und zerst√∂rt ihn.	[100, 82, 100, 51, 46, 70]	74.8333	[0.2654514735602496, 0.14575458522479776, 0.8505318100501577, -0.8519116139039844, -1.0308017456860843, 0.017024862353596727]	-0.10065843806687784	-0.26212891936302185
33	Punjab faced invasions by the Achaemenids, Greeks, Scythians, Turks, and Afghans.	Punjab sah sich Invasionen der Achaemeniden, Griechen, Skythen, T√ºrken und Afghanen gegen√ºber.	[59, 78, 88]	75	[-1.305435251280939, 0.4448926062574969, -0.2233081539990433]	-0.36128359967416185	-0.2691345512866974
144	569, appointing a Select Committee to investigate the Vice President.	569 Ernennung eines Engeren Ausschusses zur Untersuchung des Vizepr√§sidenten.	[68, 82, 75]	75	[-1.4703928161015605, 0.6405984906688512, -2.0745326270689177]	-0.968108984167209	-0.4063780903816223
218	The SS blew up crematorium V on 14 January 1945, and crematoria II and III on 20 January.	Die SS sprengte Krematorium V am 14. Januar 1945 und Krematorien II und III am 20. Januar 1945.	[81, 69, 75]	75	[-0.0754366785097826, -1.4193234201313905, -2.0745326270689177]	-1.18976e+16	-0.2352106124162674
266	Many residents of the western frontier petitioned against passage of the whiskey excise.	Viele Bewohner der Westgrenze baten gegen die Passage der Whisky-Verbrauchssteuer.	[83, 75, 67]	75	[0.2408406579210431, -0.3856724722712461, -0.8643100006459896]	-0.33638060499873085	-0.6056711077690125
519	In August 2008 they headlined nights at the Reading and Leeds festivals.	Im August 2008 standen sie bei den Festivals Reading und Leeds auf dem Programm.	[75, 68, 82]	75	[-2.0745326270689177, -1.1854504325226372, 0.6405984906688512]	-0.8731281896409012	-0.5602856874465942
533	The wavy roofs connected uneven rafters with lath or sheathing, and multiple layers of cedar shakes.	Die gewellten D√§cher haben die ungleichm√§√üigen Sparren mit der Leiste oder der Ummantelung verbunden, und mehrere Schichten der Zeder sch√ºtteln.	[75, 69, 81]	75	[-2.0745326270689177, -1.4193234201313905, 0.05066851252855241]	-1.14773e+16	-0.49620404839515686
709	Airbags can deploy due to the vehicle's undercarriage striking a low object protruding above the roadway due to the resulting deceleration.	Airbags k√∂nnen einsetzen, weil das Fahrzeug Unterwagen auff√§llig ein niedriges Objekt ragen √ºber der Fahrbahn aufgrund der daraus resultierenden Verz√∂gerung.	[82, 68, 75]	75	[0.14575458522479776, -2.0130414274143784, -0.3856724722712461]	-0.750986438153609	-0.5368577241897583
1451	Orson never joked or teased about the religious beliefs of others, wrote biographer Barton Whaley.	Orson hat nie √ºber den religi√∂sen Glauben anderer gescherzt oder ge√§rgert, schrieb der Biograph Barton Whaley.	[75, 82, 68]	75	[-2.0745326270689177, 0.6405984906688512, -1.6115940874402417]	-1015176074613430	-0.3595083951950073
1583	Troop carrier squadrons of the United States Army Air Forces	Navigationsleiste Truppentr√§ger der United States Army Air Forces	[71, 82, 72]	75	[-1.1024123569313533, 0.14575458522479776, -0.719843458479854]	-0.5588337433954699	-0.3192138373851776
1979	Well y'all gon' march right now, right t'yo cells.	Nun ja, alle gon marschieren gerade jetzt, richtig t 'yo Zellen.	[75, 69, 81]	75	[-0.30596462983574063, -1.3886564302001447, 0.4821429590688326]	-0.40415936698901755	-0.6356498003005981
2227	With the passing of the Crofters' Act in 1886 the Liberal prime minister William Gladstone emancipated crofters from the rule of the landlords.	Mit der Verabschiedung des Crofters 'Act 1886 emanzipierte der liberale Premierminister William Gladstone Crofters von der Herrschaft der Gutsbesitzer.	[73, 82, 70]	75	[-0.785501293731316, 0.14575458522479776, -1.1657187729600478]	-0.601821827155522	-0.2745726406574249
2597	The average annual rainfall between 1995 and 2006 ranged from 1979.6 to.	Die durchschnittliche j√§hrliche Niederschlagsmenge zwischen 1995 und 2006 reichte von 1979,6 bis.	[82, 68, 75]	75	[-0.7602281360236438, -1.1854504325226372, -0.7264575373614097]	-0.8907120353025636	-0.36766400933265686
2931	Violent confrontation flared up again in Beirut in 1988 between Amal and Hezbollah.	1988 kam es in Beirut erneut zu gewaltt√§tigen Auseinandersetzungen zwischen Amal und Hisbollah.	[75, 83, 67]	75	[-0.6112885366038844, 0.2408406579210431, -2.102528091085145]	-0.8243253232559954	-0.34349557757377625
3038	Foreign nationalities serving with the partisans and Soviet partisans abroad	Ausl√§ndische Nationalit√§ten im Dienste der Partisanen und sowjetischen Partisanen im Ausland	[69, 75, 81]	75	[-1.0903643598263917, -1.386634781719011, -0.3853798995650292]	-0.9541263470368105	-0.3164915144443512
3352	During the late shower, Timo Glock gambled on staying out on drys.	W√§hrend der sp√§ten Dusche spielte Timo Glock darauf, auf Trockenheit zu bleiben.	[78, 78, 69]	75	[-0.23458970556018363, 0.6177824849607275, -1.4193234201313905]	-0.3453768802436155	-0.5333127975463867
3438	Michelle Moultrie laid down a bunt that spun around the batter's box, but never went foul.	Michelle Moultrie legte eine Fotze nieder, die sich um die Schachtel des Teiges drehte, aber nie faul wurde.	[69, 80, 76]	75	[-1.4193234201313905, -0.04441756016769294, 0.1719071704805337]	-0.43061126993951654	-0.47067099809646606
3823	Men wore moccasins, long leggings that went up to their hips, a loincloth, and a belt.	Die M√§nner trugen Mokassins, lange Leggings, die an ihre H√ºften hinaufstiegen, ein Lendentuch und einen G√ºrtel.	[74, 77, 74]	75	[-0.3802703256529918, 0.3948448277206306, -0.6270457621312975]	-0.2041570866878862	-0.4272596836090088
3971	The higher the "tarik" or pull, the thicker the froth.	Je h√∂her der Tarik, desto dicker der Schaum.	[72, 78, 75]	75	[-1.6550947727313112, -0.23458970556018363, -0.4231847500110403]	-0.7709564094341784	-0.295971155166626
3980	Many of the trees flank a natural creek that bisects the campus.	Viele der B√§ume flankieren einen nat√ºrlichen Bach, der den Campus biegt.	[75, 81, 69]	75	[-2.0745326270689177, 0.4821429590688326, -0.6501606411289255]	-0.7475167697096702	-0.39843615889549255
4232	The emotional, conflicted performance during the storyline garnered Berman her very first Daytime Emmy nomination in 2007.	Die emotionale, widerspr√ºchliche Performance w√§hrend der Storyline brachte Berman 2007 ihre allererste Daytime Emmy Nominierung ein.	[75, 74, 76]	75	[-0.30596462983574063, -0.27396814399966013, -0.31013469893126033]	-0.29668915758888703	-0.3556218147277832
4259	When mailed photographs, Le Gros Clark retorted casually "Shades of Piltdown."	Als Le Gros Clark Fotografien verschickte, reagierte er beil√§ufig auf "Shades of Piltdown".	[100, 87, 100, 50, 68, 45]	75	[0.2654514735602496, 0.6211849487060245, 0.8505318100501577, -0.89218775095613, -0.11585824492267038, -0.8843807961895145]	-0.025876426625313826	-0.44951969385147095
4351	She subsequently became very dehydrated and then fainted, suffering a mild concussion.	Danach wurde sie sehr dehydriert und wurde dann ohnm√§chtig und erlitt eine leichte Gehirnersch√ºtterung.	[74, 80, 71]	75	[-0.6270457621312975, -0.04441756016769294, -0.9427811157199508]	-0.5380814793396471	-0.4098539650440216
5172	In 1863 Lyell's Geological Evidences of the Antiquity of Man popularised prehistory, though his caution on evolution disappointed Darwin.	1863 popularisierte Lyells Geologische Evidenzen des Altertums des Menschen die Vorgeschichte, obwohl seine Vorsicht vor der Evolution Darwin entt√§uschte.	[87, 100, 95, 65, 43, 60]	75	[0.6211849487060245, 0.2654514735602496, 0.40309849169632395, -0.28804569517394557, -1.1555667685174589, -0.3435374010636478]	-0.08290249179874234	-0.41288208961486816
5915	Offshore, the Smithic Sands sandbank stretches out into the bay.	Offshore erstreckt sich die Sandbank Smistic Sands in die Bucht.	[100, 92, 74, 55, 79, 50]	75	[0.2654514735602496, 0.1346385006840237, -0.614933996345165, -0.6908070656954018, 0.34161350545903657, -0.7040996644808922]	-0.2113562078030249	-0.5415769815444946
6459	Venom accumulates in the lumen of the glands and passes through paired ducts into the spider's two hollow fangs.	Gift sammelt sich im Lumen der Dr√ºsen an und geht durch paarweise Kan√§le in die beiden Hohlz√§hne der Spinne.	[82, 72, 71]	75	[0.2141752408850176, -0.719843458479854, -1.1024123569313533]	-0.5360268581753965	-0.3220289945602417
6534	Tracy Province, a lifer, was apprehended in Wyoming on August 9.	Die Provinz Tracy wurde am 9. August in Wyoming festgenommen.	[75, 82, 68]	75	[-0.5198479236489196, 0.031867639766508006, -1.577778951731409]	-0.6885864118712735	-0.2608599066734314
107	The Mughals also moved to conquer Sindh in the lower Indus valley.	Die Moguln zog auch nach Sindh im unteren Indus-Tal zu erobern.	[85, 76, 65]	75.3333	[0.4310128033135338, 0.1719071704805337, -2.0531455465314647]	-0.48340852424579905	-0.329489141702652
295	On 4 April, Israel indicted alleged Hamas "rocket godfather" Dirar Abu Sisi in the Beersheba District Court.	Am 4. April klagte Israel den angeblichen Raketenpaten der Hamas "Dirar Abu Sisi" vor dem Bezirksgericht von Beersheba an.	[82, 69, 75]	75.3333	[0.2141752408850176, -1.3886564302001447, -0.4685902305312789]	-0.5476904732821354	-0.3034301996231079
376	Experiments also probe subtle phenomena such as visual illusions, or the emotions aroused by stimuli of different sorts.	Experimente untersuchen auch subtile Ph√§nomene wie visuelle Illusionen oder Emotionen, die durch Reize unterschiedlicher Art geweckt werden.	[84, 71, 71]	75.3333	[0.3627866325195199, -0.9427811157199508, -1.1024123569313533]	-0.5608022800439281	-0.4190960228443146
788	Under their new cultural influences, the people of the New Kingdom began using oboes, trumpets, lyres, lutes, castanets, and cymbals.	Unter ihren neuen kulturellen Einfl√ºssen begannen die Menschen des Neuen Reiches mit Oboen, Trompeten, Lauten, Lauten, Kasten und Zimbeln.	[78, 61, 87]	75.3333	[0.006776364268776851, -1.9733342544670616, -0.31279481766981004]	-0.7597842359560315	-0.27261224389076233
807	He also picked his maiden Test wicket during the second innings of Pakistan.	Er w√§hlte auch seine Jungfrau Test wicket w√§hrend der zweiten Innings von Pakistan.	[80, 72, 74]	75.3333	[-0.18274099678607322, -0.9439568253313346, -0.27396814399966013]	-0.46688865537235597	-0.4312317967414856
1465	Dell'Utri's lawyer, Enrico Trantino, dismissed Giuffr√®'s allegations as an "anthology of hearsay".	Dell 'Utris Anwalt Enrico Trantino wies Giuffr√©s Behauptungen als "Anthologie des H√∂rens" zur√ºck.	[100, 100, 80, 51, 56, 65]	75.3333	[0.2654514735602496, 0.8505318100501577, -0.04441756016769294, -0.8519116139039844, -0.6149183362481689, -0.16325626935502552]	-0.09308674934407742	-0.22608523070812225
2210	For an excited xenon atom collides with a chlorine donor.	F√ºr ein angeregtes Xenon-Atom kollidiert mit einem Chlorspender.	[90, 76, 60]	75.3333	[-0.0443348266575098, -0.4247618509526743, -1.8764754436939348]	-0.7818573737680397	-0.18782681226730347
4227	After talking about it with Phelan, Seb insults Anna so she slaps him.	Nachdem er mit Phelan dar√ºber gesprochen hat, beleidigt Seb Anna, so dass sie ihn schl√§gt.	[81, 70, 75]	75.3333	[-0.8497147996944105, -1.1657187729600478, -0.5198479236489196]	-0.845093832101126	-0.4027542471885681
4390	Bright, and the assistant cashier, Mrs. Violet Ogden, later failed to identify Pierpont after his arrest in Detroit.	Helle, und die stellvertretende Kassiererin, Mrs. Violet Ogden, sp√§ter nicht Pierpont nach seiner Verhaftung in Detroit zu identifizieren.	[78, 71, 77]	75.3333	[-0.23458970556018363, -0.9427811157199508, -0.15167916733124173]	-0.44301666287045866	-0.24993003904819489
5041	Coolness of extremities can indicate decreased perfusion secondary to endotoxemia.	Die Abk√ºhlung der Extremit√§ten kann auf eine verminderte Perfusion im Sekund√§rbereich der Endotox√§mie hinweisen.	[74, 79, 73]	75.3333	[-0.3802703256529918, 0.8407201422008245, -0.785501293731316]	-0.10835049239449446	-0.42624953389167786
5089	which concludes with the line "Thou false to him, thou fiend to me".	die mit der Zeile schlie√üt: "Du f√§lschst ihm, du filigierst mir".	[79, 75, 72]	75.3333	[-1.028688127035944, -0.05103048675956321, -0.8051061417376557]	-0.6282749185110543	-0.5284423828125
6087	Bartlett Sher directed, with musical staging by Christopher Gattelli and associate choreographer Joe Langworth.	Bartlett Sher Regie, mit musikalischer Inszenierung von Christopher Gattelli und Associate Choreograph Joe Langworth.	[86, 83, 57]	75.3333	[-0.4022814813405768, 0.2408406579210431, -1.749690450750551]	-0.6370437580566949	-0.28765803575515747
6178	That single fared slightly better than "Herculean", peaking at No.	Dieser Single ging es etwas besser als "Herkulan" und erreichte den Gipfel von No.	[78, 77, 71]	75.3333	[-0.23458970556018363, 0.3948448277206306, -1.1024123569313533]	-0.3140524115903021	-0.7697892189025879
5784	Doubleday's regiments retired to the turnpike in an orderly fashion.	Doubleday Regiments zog sich in geordneter Weise in den Turnhecht zur√ºck.	[100, 91, 81, 51, 58, 72]	75.5	[0.2654514735602496, 0.04515183701325695, 0.05066851252855241, -0.8519116139039844, -0.5317416543605858, 0.08913731503704563]	-0.15554068835424428	-0.6302123069763184
170	Finally, the basilar artery divides into two posterior cerebral arteries.	Schlie√ülich teilt sich die Arteria basilar in zwei Hinterhirnarterien auf.	[81, 74, 72]	75.6667	[0.05066851252855241, -0.27396814399966013, -0.9439568253313346]	-0.38908548560081413	-0.408447265625
892	Captain John Gwinn commanded her on this voyage, departing on 9 December 1848 and arriving at Tripoli on 19 January 1849.	Kapit√§n John Gwinn befahl ihr auf dieser Reise, die am 9. Dezember 1848 abfuhr und am 19. Januar 1849 in Tripolis ankam.	[67, 81, 79]	75.6667	[-0.9004101963737501, 1.2865954566810183, 0.16523189586879544]	0.18380571872535456	-0.2683679163455963
1791	On April 29, the gunboats spent most of the day bombarding two Confederate forts.	Am 29. April bombardierten die Kanonenboote den gr√∂√üten Teil des Tages zwei Konf√∂derierte Festungen.	[82, 76, 69]	75.6667	[0.2141752408850176, 0.1719071704805337, -1.4193234201313905]	-0.344413669588613	-0.36424222588539124
1929	It is saturated with materialism, sensualism and ‚Ä¶ commercialism‚Äô.	Es ist ges√§ttigt mit Materialismus, Sinnlichkeit und Virtualit√§t.	[82, 69, 76]	75.6667	[-0.7602281360236438, -1.4193234201313905, -1.980933263043751]	-1.38683e+16	-0.7786626815795898
2489	The judgement also referenced prior constitutional jurisprudence.	Das Urteil bezog sich auch auf die vorherige verfassungsrechtliche Rechtsprechung.	[83, 68, 76]	75.6667	[0.2408406579210431, -0.7760070199361482, -0.36804409368167157]	-0.30107015189892555	-0.5592310428619385
2680	Shortly after, the nuns kidnap Victoria and Rebbecca, claiming that Rebbecca attacked her aunt under demonic possession.	Kurz darauf entf√ºhren die Nonnen Victoria und Rebbecca und behaupten, Rebbecca habe ihre Tante unter d√§monischem Besitz angegriffen.	[76, 82, 69]	75.6667	[-1.980933263043751, 0.14575458522479776, -1.4193234201313905]	-1.08483e+16	-0.2491341382265091
4066	Meanwhile, in the United States, Jaguar marketed the "Vanden Plas" with Daimler fluted grilles and licence plate housings.	Unterdessen vermarktete Jaguar in den Vereinigten Staaten die "Vanden Plas" mit Daimler-Gittern und Lizenzschildergeh√§usen.	[62, 73, 92]	75.6667	[-1.110579489363207, -0.7100200690414104, 0.1346385006840237]	-0.5619870192401979	-0.39712756872177124
4291	Apollo flayed the limbs of Marsyas alive in a cave near Celaenae in Phrygia for his hubris to challenge a god.	Apollo plagierte die Gliedma√üen von Marsyas lebendig in einer H√∂hle in der N√§he von Celaenae in Phrygia f√ºr seine Hybris, um einen Gott herauszufordern.	[82, 74, 71]	75.6667	[0.14575458522479776, -0.27396814399966013, -1.1024123569313533]	-0.4102086385687385	-0.3444861173629761
4536	Both return to steal the Time Scepter and the Daimyo's war staff and send the turtles into different worlds.	Beide kehren zur√ºck, um den Time Scepter und den Daimyo-Kriegsstab zu stehlen und die Schildkr√∂ten in verschiedene Welten zu schicken.	[78, 81, 68]	75.6667	[-0.23458970556018363, -0.0754366785097826, -1.577778951731409]	-0.629268445267125	-0.3309529721736908
4729	After passing southeast of Bermuda, the storm dissipated on September 11.	Nachdem er s√ºd√∂stlich von Bermuda vorbeigekommen war, verschwand der Sturm am 11. September.	[76, 69, 82]	75.6667	[-0.23165893401848944, -1.3886564302001447, 0.6405984906688512]	-0.326572291183261	-0.4141113758087158
4961	On 3 January, he repeated his accusations and nicknames the coup the "Kremlin's Putsch."	Am 3. Januar wiederholte er seine Vorw√ºrfe und nannte den Putsch den "Putsch des Kreml".	[81, 72, 74]	75.6667	[0.05066851252855241, -0.719843458479854, -0.6270457621312975]	-0.4320735693608664	-0.3009491562843323
5065	However, central authority disintegrated and the Republic's authority succumbed to that of regional warlords, mostly from the former Beiyang Army.	Jedoch zerfiel die Zentralbeh√∂rde und die Autorit√§t der Republik erlag der der regionalen Kriegsherren, vor allem der ehemaligen Beiyang Armee.	[76, 71, 80]	75.6667	[-0.4247618509526743, -0.9427811157199508, 0.323687427468814]	-0.34795184640127036	-0.4441027045249939
5277	Workers also armored and channelized the creek downstream of Villaview Road by lining the banks with stone blocks.	Die Arbeiter panzerten und kanalisierten den Bach flussabw√§rts der Villaview Road, indem sie die Ufer mit Steinbl√∂cken auss√§ten.	[86, 73, 68]	75.6667	[0.5260988760097791, -0.49690580123975703, -1.577778951731409]	-0.5161952923204622	-0.39784520864486694
5703	Several communist parties drew their cadres from the syndicalists' ranks.	Mehrere kommunistische Parteien zogen ihre Kader aus den Reihen der Syndikalisten.	[83, 74, 70]	75.6667	[0.28848093670226876, -0.27396814399966013, -1.2608678885313718]	-0.4154516986095877	-0.2048933207988739
5766	During April and May 1839, British and American dealers surrendered 20,283 chests and 200 sacks of opium.	Im April und Mai 1839 √ºbergaben britische und amerikanische H√§ndler 20.283 Kisten und 200 Opiums√§cke.	[68, 83, 76]	75.6667	[-1.577778951731409, 0.2408406579210431, -1.980933263043751]	-1105957185618030	-0.2692987322807312
5985	Young Samuel David Luzzatto composed a satire of his own against the Temple.	Der junge Samuel David Luzzatto komponierte eine eigene Satire gegen den Tempel.	[76, 82, 69]	75.6667	[-1.980933263043751, 0.14575458522479776, -1.0675351751577902]	-0.9675712843255813	-0.15372523665428162
6266	The Yardbirds played their final gig in July 1968 at Luton College of Technology in Bedfordshire.	Die Yardbirds spielten ihren letzten Auftritt im Juli 1968 am Luton College of Technology in Bedfordshire.	[75, 79, 73]	75.6667	[-0.4685902305312789, -0.13950363286393827, -0.49690580123975703]	-0.36833322154499143	-0.18186183273792267
6521	On Day 28, Samantha nominated Kiera and Mark for eviction.	Am 28. Tag nominierte Samantha Kiera und Mark f√ºr die R√§umung.	[81, 78, 68]	75.6667	[0.4821429590688326, -1.4678241570166428, -0.8261045005564989]	-0.603928566168103	-0.22008436918258667
4169	On the southern part of the Central Plateau, there are olivine melilite nephelinite, olivine nephelinite, quartz tholeiite lava flows.	Auf dem s√ºdlichen Teil des Zentralen Plateaus gibt es olivinen Melilit Nephelinit, olivinen Nephelinit, Quarz tholeiite Lavastr√∂me.	[100, 82, 93, 52, 68, 60]	75.8333	[0.2654514735602496, -0.7602281360236438, -0.21257256679872272, -0.8116354768518387, -0.11585824492267038, -0.3435374010636478]	-0.32973005868337896	-0.3743331730365753
4524	They eventually succeed in conning the restaurant from the Hutchinsons via blackmailing Harry.	Schlie√ülich gelingt es ihnen, das Restaurant von den Hutchinsons √ºber Harry zu erpressen.	[100, 100, 75, 45, 65, 70]	75.8333	[0.2654514735602496, 0.8505318100501577, -0.5198479236489196, -1.093568436216858, -0.24062326775404502, 0.017024862353596727]	-0.12017191360930313	-0.4015618860721588
4621	I‚Äôm no geneticist, but propagating that DNA seems risky at best."	Ich bin kein Genetiker, aber die Verbreitung, dass DNA scheint bestenfalls riskant ".	[100, 100, 80, 50, 70, 55]	75.8333	[0.2654514735602496, 0.8505318100501577, -0.04441756016769294, -0.89218775095613, -0.032681563035087305, -0.5238185327722701]	-0.06285368722012885	-0.4907859265804291
4690	Animal taxa found in the lake include bivalves, gastropods and ostracods.	Zu den im See vorkommenden Tiertaxa geh√∂ren Biklappen, Schnecken und Ostracoden.	[100, 100, 77, 51, 55, 72]	75.8333	[0.2654514735602496, 0.8505318100501577, -0.32967577825642896, -0.8519116139039844, -0.6565066771919604, 0.08913731503704563]	-0.10549557845082015	-0.5435848236083984
139	This definition encompasses both nominal empires and neocolonialism.	Diese Definition umfasst sowohl Nominalreiche als auch Neokolonialismus.	[71, 87, 70]	76	[-1.1024123569313533, 0.6211849487060245, -1.1657187729600478]	-0.5489820603951255	-0.1931685507297516
214	Men wore fancy armbands around the upper arm when dancing without a parka.	M√§nner trugen ausgefallene Armbinden um den Oberarm, wenn sie ohne Parka tanzen.	[71, 77, 80]	76	[-0.9001922144339011, 0.3948448277206306, 0.323687427468814]	-0.060553319748152167	-0.446538507938385
236	At the Oakey reunion, Kirsten kisses Ned who rejects her.	Beim Oakey-Wiedersehen k√ºsst Kirsten Ned, der sie ablehnt.	[84, 84, 60]	76	[0.33592673061728845, 0.24647627631908922, -2.8454232045315577]	-0.7543400658650601	-0.30582529306411743
455	Azerbaijani Americans Georgian Americans Iranian Americans Turkish Americans Lebanese Americans Iraqi Americans Syrian Americans Armenian diaspora	Aserbaidschaner Amerikaner Georgische Amerikaner Iranische Amerikaner T√ºrkische Amerikaner Libanesische Amerikaner Irakische Amerikaner Syrische Amerikaner Armenische Diaspora	[78, 76, 74]	76	[-0.23458970556018363, 0.1719071704805337, -0.6270457621312975]	-0.22990943240364914	-0.24812884628772736
625	In Giraffatitan, both laminae were not conflated, and the spinodiapophyseal laminae reached up to the top of the neural spines.	Bei Giraffatitan wurden beide Laminen nicht verflochten, und die spinodiapophysischen Laminen erreichten bis zur Spitze der neuronalen Wirbels√§ule.	[70, 70, 88]	76	[-1.2608678885313718, -1.2277419668850482, -0.2233081539990433]	-0.9039726698051543	-0.4269246459007263
682	Rendezvousing on 13 July, the remaining boats resumed the hunt.	Rendezvousing am 13. Juli, die restlichen Boote wieder die Jagd.	[76, 83, 69]	76	[-1.980933263043751, 0.2408406579210431, -1.4193234201313905]	-1.05314e+16	-0.3941640853881836
975	Gray raved about Pettis' portrayal of Theo when the character gets stranded in a blackout.	Gray schw√§rmt √ºber Pettis Darstellung von Theo, als der Charakter in einem Blackout gestrandet wird.	[66, 87, 75]	76	[-1.3756225779151277, 0.568389231147961, -0.4685902305312789]	-0.4252745257661485	-0.34088125824928284
1139	He ends up in a fistfight with Joe over Mrs Gargery's taunting, and Joe easily defeats him.	Er endet in einem Fistfight mit Joe √ºber Frau Gargery 's Verh√∂hnung, und Joe besiegt ihn leicht.	[84, 74, 70]	76	[0.24647627631908922, -0.6270457621312975, -1.1657187729600478]	-0.5154294195907521	-0.4401010274887085
1298	The concert benefited those recovering from the aftermath of the 2017 California wildfires and 2018 Southern California mudflows.	Das Konzert profitierte von denen, die sich nach den Waldbr√§nden 2017 in Kalifornien und 2018 in S√ºdkalifornien erholten.	[76, 83, 69]	76	[-1.980933263043751, 0.2408406579210431, -1.4193234201313905]	-1.05314e+16	-0.3895519971847534
1302	It resulted from a backcrossing of the F1 hybrid of its parents to S. vulgaris.	Es resultierte aus einer R√ºckkreuzung des F1 Hybrid seiner Eltern zu S. vulgaris.	[76, 83, 69]	76	[-1.980933263043751, 0.7990540222688698, -1.9235547637436115]	-1035144668172830	-0.4300123155117035
1436	College presidents typically enforced strict discipline, and upperclassman enjoyed hazing freshman.	Die Pr√§sidenten des Kollegiums erzwangen in der Regel strenge Disziplin, und Obersch√ºler genossen hazing Neuling.	[88, 64, 76]	76	[-0.2233081539990433, -1.5657947233076184, -0.36804409368167157]	-0.7190489903294445	-0.5243140459060669
1449	The early gassing machinery frequently broke down due to overuse, forcing the SS to shoot Jews assembled for suffocation.	Die fr√ºhen Vergasungsmaschinen brachen h√§ufig durch √úbernutzung zusammen, wodurch die SS gezwungen wurde, Juden zu erschie√üen, die zur Erstickung versammelt waren.	[86, 84, 58]	76	[-0.4022814813405768, 0.33592673061728845, -1.3605759076103077]	-0.47564355277786535	-0.4730488955974579
2174	', which roughly translates to "And helped to plow this half acre with 'hoy!	, was in etwa √ºbersetzt Und half, diese H√§lfte Acre pfl√ºgen mit "hoy!	[76, 78, 74]	76	[-1.980933263043751, 0.006776364268776851, -0.27396814399966013]	-0.7493750142582115	-0.4904943108558655
2355	Individual differences in Extraversion first manifest in infancy as varying levels of positive emotionality.	Individuelle Unterschiede in Extraversion manifestieren sich erst in der Kindheit als unterschiedliche Ebenen positiver Emotionalit√§t.	[72, 81, 75]	76	[-0.9439568253313346, 0.05066851252855241, -0.05103048675956321]	-0.3147729331874485	-0.36133795976638794
2561	The Monetary Systems of the Han and Roman Empires.	Die W√§hrungssysteme der Han und R√∂mischen Reiche.	[76, 73, 79]	76	[-0.4247618509526743, -0.49690580123975703, 0.16523189586879544]	-0.25214525210787864	-0.2996295988559723
2636	Scott "Bam Bam" Bigelow, 45, American professional wrestler, drug overdose.	Scott "Bam Bam" Bigelow, 45, amerikanischer Profi-Wrestler, Drogen√ºberdosis.	[81, 74, 73]	76	[0.4821429590688326, -0.614933996345165, -0.49690580123975703]	-0.20989894617202984	-0.22561635076999664
4121	After the Dumas tornado dissipated, an EF2 tornado touched down and passed north of Monticello before dissipating near Garrett Bridge.	Nachdem der Dumas Tornado zerstreut war, landete ein EF2 Tornado n√∂rdlich von Monticello, bevor er in der N√§he der Garrett Bridge zerstreute.	[79, 78, 71]	76	[-0.13950363286393827, 0.6177824849607275, -1.1024123569313533]	-0.20804450161152135	-0.39489084482192993
4185	Navalny accused the Kremlin of orchestrating the attack.	Navalny beschuldigte den Kreml, den Anschlag inszeniert zu haben.	[76, 83, 69]	76	[-1.980933263043751, 0.7990540222688698, -1.3886564302001447]	-0.856845223658342	-0.33319970965385437
4355	The depression soon intensified into Tropical Storm Paine around 1800 UTC on the September 11.	Die Depression intensivierte sich bald in Tropical Storm Paine um 1800 UTC am 11. September.	[71, 80, 77]	76	[-1.1024123569313533, -0.04441756016769294, 0.3948448277206306]	-0.2506616964594719	-0.3448981046676636
4889	To compensate for this, he became a doting uncle, showering gifts on his nieces and nephews.	Um dies zu kompensieren, wurde er ein doting Onkel, Duschen Geschenke auf seine Nichten und Neffen.	[76, 85, 67]	76	[-0.5461808818176719, 0.4310128033135338, -2.102528091085145]	-0.7392320565297611	-0.4200359582901001
4950	The Saskatchewan Roughriders were called the Regina Rugby Club, Regina Roughriders and nicknamed the "Western Riders" or "Green Riders".	Die Saskatchewan Roughrider wurden Regina Rugby Club, Regina Roughrider und Spitznamen "Western Riders" oder "Green Riders" genannt.	[76, 84, 68]	76	[-1.980933263043751, 0.9575095538688884, -1.6115940874402417]	-0.878339265538368	-0.268198162317276
5308	Julius Caesar conquered the remainder of Gaul and overcame a revolt carried out by the Gallic chieftain Vercingetorix in 52 BC.	Julius Caesar eroberte den Rest Galliens und √ºberwand einen Aufstand des gallischen H√§uptlings Vercingetorix im Jahre 52 v. Chr..	[83, 83, 62]	76	[0.2408406579210431, -0.6707414723528771, -1.110579489363207]	-0.513493434598347	-0.26232847571372986
5582	The column sparked controversy, and Foyt immediately refuted the allegations.	Die S√§ule l√∂ste Kontroversen aus, und Foyt widerlegte die Behauptungen sofort.	[100, 86, 92, 50, 58, 70]	76	[0.2654514735602496, 0.5260988760097791, 0.1346385006840237, -0.89218775095613, -0.5317416543605858, 0.017024862353596727]	-0.08011928211817779	-0.35616183280944824
5725	Mississippi Rivers" and "to remove sand bars on the Ohio and planters, sawyers, and snags on the Mississippi".	Mississippi Rivers "und" Sandbalken auf dem Ohio und Pflanzer, S√§ger und Haken auf dem Mississippi zu entfernen ".	[84, 74, 70]	76	[0.33592673061728845, -0.27396814399966013, -1.2608678885313718]	-0.39963643397124776	-0.3505210876464844
5921	In 2006, TVXQ starred in their second miniseries Vacation, also releasing a soundtrack.	2006 spielte TVXQ in ihrer zweiten Miniserie Vacation und ver√∂ffentlichte ebenfalls einen Soundtrack.	[76, 84, 68]	76	[-1.2971481180482443, 0.16954984694766959, -1.1854504325226372]	-0.7710162345410706	-0.35825368762016296
6151	The storyline develops into infidelity when Alan kisses Frankie.	Die Handlung entwickelt sich zur Untreue, als Alan Frankie k√ºsst.	[73, 84, 71]	76	[-0.7100200690414104, 0.24647627631908922, -1.1024123569313533]	-0.5219853832178915	-0.33282116055488586
6201	The light blue designated the wearer as an infantryman.	Das hellblaue bezeichnete den Tr√§ger als Infanterie.	[100, 94, 81, 66, 45, 70]	76	[0.2654514735602496, 0.3136118280255572, 0.05066851252855241, -0.24776955812179996, -1.072390086629876, 0.017024862353596727]	-0.11223382804728665	-0.4288744330406189
6399	Heavy fighting, meanwhile, had flared in Kontum and Pleiku Province.	In der Zwischenzeit hatten schwere K√§mpfe in Kontum und der Provinz Pleiku stattgefunden.	[85, 69, 74]	76	[0.35378059459537986, -1.4193234201313905, -0.27396814399966013]	-0.4465036565118903	-0.5350531935691833
6453	As the Scions mourn their fallen comrade, Aymeric parleys for aid in Ishgard's defense against Nidhogg's forces.	W√§hrend die Scions ihren gefallenen Kameraden trauern, parleys Aymeric um Hilfe in Ishgards Verteidigung gegen Nidhogs Truppen.	[82, 70, 76]	76	[-1.4193370788927508, -1.8340681000728447, -0.329910394033403]	-1.19444e+16	-0.37326523661613464
6880	He resuscitates a boy who died in a well at Cape Comorin.	Er belebt einen Jungen, der in einem Brunnen am Kap Comorin starb.	[77, 80, 71]	76	[-0.15167916733124173, -0.04441756016769294, -0.9427811157199508]	-0.3796259477396285	-0.3132407069206238
2928	The financial legacy of the Protectorate consisted, apart from crippling Crown debts, of an unprecedentedly debased coinage.	Das finanzielle Erbe des Protektorats bestand, abgesehen von l√§hmenden Kronenschulden, aus einer beispiellosen M√ºnzpr√§gung.	[100, 82, 80, 50, 75, 70]	76.1667	[0.2654514735602496, 0.14575458522479776, -0.9392014633651773, -0.89218775095613, 0.1752601416838704, 0.017024862353596727]	-0.2046496919164655	-0.3606419563293457
3055	The depression slowly weakened inland and dissipated late on August 7.	Die Depression schw√§chte sich langsam im Inland und zerstreute sich am 7. August.	[100, 97, 77, 50, 68, 65]	76.1667	[0.2654514735602496, 0.5820718190378574, -0.32967577825642896, -0.89218775095613, -0.11585824492267038, -0.16325626935502552]	-0.10890912514869129	-0.5109452605247498
4874	The monarchs complied, with Despot concealing his Habsburg sympathies and addressing letters of friendship to Z√°polya.	Die Monarchen folgten, Despot verbarg seine Habsburger Sympathien und sprach Freundschaftsbriefe an Z√°polya an.	[100, 100, 84, 50, 48, 75]	76.1667	[0.2654514735602496, 0.37321150863630664, 0.33592673061728845, -0.89218775095613, -0.9476250637985012, 0.197305994062219]	-0.11131951797976125	-0.31693291664123535
5591	The Cardinals inducted Curt Flood, Bob Forsch, George Kissell and Ted Simmons into the franchise Hall of Fame.	Die Kardin√§le induzierten Curt Flood, Bob Forsch, George Kissell und Ted Simmons in die Franchise Hall of Fame.	[100, 85, 88, 51, 58, 75]	76.1667	[0.2654514735602496, -0.8820400815816134, 0.7162710214022698, -0.8519116139039844, -0.5317416543605858, 0.197305994062219]	-0.18111081013690755	-0.1500818282365799
85	General Sir Edmund Ironside of the British Army comes to Warsaw, via Gdynia.	General Sir Edmund Ironside der Britischen Armee kommt √ºber Gdynia nach Warschau.	[78, 77, 74]	76.3333	[-0.08304754238398711, 0.3948448277206306, -0.6270457621312975]	-0.10508282559821798	-0.22076283395290375
102	), Kluwer academic/ Plenum publishers, New York, 1999	), Kluwer akademischen / Plenum Herausgeber, New York, 1999	[81, 70, 78]	76.3333	[0.13986954506776642, -1.1657187729600478, 0.006776364268776851]	-0.33969095454116816	-0.28380802273750305
526	Each of these cars or minibuses displays their particular route on signboards behind the windscreen.	Jedes dieser Autos oder Kleinbusse zeigt ihre spezielle Route auf Schildern hinter der Windschutzscheibe an.	[80, 74, 75]	76.3333	[-0.04441756016769294, -0.27396814399966013, -0.4685902305312789]	-0.2623253115662107	-0.4333009123802185
552	Troops H and I of the 10th Cavalry sallied forth for an escort and supply to the 5th Cavalry near Beaver Creek.	Die Truppen H und I der 10. Kavallerie salbten sich zur Begleitung und Versorgung der 5. Kavallerie in der N√§he von Beaver Creek.	[81, 72, 76]	76.3333	[-0.0754366785097826, -0.9439568253313346, 0.1719071704805337]	-0.28249544445352787	-0.3913654685020447
766	Around Mount Job, porphyritic hornblende, biotite and quartz rhyodacite lava flows of the Job Assemblage were erupted.	Rund um den Berg Hiob wurden porphyritische Hornblende, Biotit und Quarzrhyodacit Lavastr√∂me der Job Assemblage ausgebrochen.	[81, 60, 88]	76.3333	[0.4821429590688326, -2.056177841976174, -0.2233081539990433]	-0.5991143456354616	-0.32350262999534607
835	Congressmen before disfranchising constitutions were passed throughout the former Confederacy.	Kongressabgeordnete vor der Entrechtung von Verfassungen wurden in der gesamten ehemaligen Konf√∂deration verabschiedet.	[65, 69, 95]	76.3333	[-1.26236508446601, -1.0903643598263917, 0.40309849169632395]	-0.6498769841986926	-0.3770153224468231
1234	During the Italian battles, the Czechoslovaks and Southern Slavs declared their independence.	W√§hrend der italienischen Schlachten erkl√§rten die Tschechoslowaken und S√ºdslawen ihre Unabh√§ngigkeit.	[75, 71, 83]	76.3333	[-0.5198479236489196, -0.9427811157199508, 0.7990540222688698]	-0.22119167236666692	-0.25309666991233826
1619	The Diversified Greek Council consists of 9 cultural organizations, four fraternities and five sororities.	Der Diversifizierte Griechische Rat besteht aus 9 kulturellen Organisationen, vier Bruderschaften und f√ºnf Sortit√§ten.	[79, 81, 69]	76.3333	[-0.13950363286393827, -0.0754366785097826, -1.4193234201313905]	-0.5447545771683705	-0.355951189994812
2392	Another case occurred with Archimandrite Parthenios, hegumen of St. Paul Monastery at Mount Athos.	Ein anderer Fall trat mit Archimandrite Parthenios, hegumen von Str. Paul Monastery am Berg Athos auf.	[87, 80, 62]	76.3333	[-0.31279481766981004, -0.04441756016769294, -1.465459085920234]	-0.6075571545859123	-0.2598990499973297
2770	Finally, enraged by Heathcliff's constant appearance and foul parlance, he forbids Heathcliff from visiting Catherine altogether.	Schlie√ülich, w√ºtend von Heathcliffs best√§ndigem Aussehen und √ºblem Sprachgebrauch, verbietet er Heathcliff, Catherine insgesamt zu besuchen.	[100, 100, 100, 51, 62, 45]	76.3333	[0.2654514735602496, 0.8505318100501577, 0.37321150863630664, -0.8519116139039844, -0.36538829058541966, -0.8843807961895145]	-0.10208098473870077	-0.4329695999622345
3042	Design 4 depicts "a single quadruped in ribbon style."	Design 4 zeigt "ein einzelnes Viereck im Farbbandstil".	[69, 80, 80]	76.3333	[-1.4193234201313905, -0.04441756016769294, 1.0636577994409213]	-0.133361060286054	-0.44321683049201965
3082	Tertiary dentin, also known as reparative dentin, forms in reaction to stimuli, such as attrition or dental caries.	Terti√§rer Dentin, auch als reparativer Dentin bekannt, bildet in Reaktion auf Reize, wie Zersetzung oder Karies.	[85, 73, 71]	76.3333	[0.4310128033135338, -0.49690580123975703, -1.1024123569313533]	-0.38943511828585886	-0.3402683734893799
3894	On October 13, Stuart blundered into the rear guard of the Union III Corps near Warrenton, resulting in the First Battle of Auburn.	Am 13. Oktober tauchte Stuart in die Hinterhut des Union III Corps in der N√§he von Warrenton auf, was zur Ersten Schlacht von Auburn f√ºhrte.	[83, 63, 83]	76.3333	[0.2408406579210431, -1.0548174111253639, 0.01794050062390915]	-0.26534541752680385	-0.3380149006843567
4680	If that offends you, then I pray God may spare me the indignity of representing you in Parliament."	Wenn Sie dadurch beleidigt werden, dann bitte ich Gott, dass er mir die Emp√∂rung erspart, Sie im Parlament zu vertreten ".	[80, 75, 74]	76.3333	[-0.04441756016769294, -0.7192625881675263, -0.6270457621312975]	-0.46357530348883885	-0.39644429087638855
4785	On 30 May 1923, Pi≈Çsudski resigned as Chief of the General Staff.	Am 30. Mai 1923 trat Pi≈Çsudski als Generalstabschef zur√ºck.	[70, 85, 74]	76.3333	[-1.2608678885313718, 0.4310128033135338, -0.27396814399966013]	-0.3679410764058327	-0.1410285234451294
4814	It tends to alienate, to infantilize, and to colonize its audience.	Sie neigt dazu, sich zu entfremden, zu infantilisieren und ihr Publikum zu kolonisieren.	[79, 100, 88, 50, 76, 65]	76.3333	[-0.13950363286393827, 0.2654514735602496, -0.2233081539990433, -0.89218775095613, 0.21684848262766196, -0.16325626935502552]	-0.1559926418310376	-0.2901252806186676
5068	Late on December 14, the tropical depression dissipated near Borneo.	Am sp√§ten 14. Dezember zerfiel die tropische Depression in der N√§he von Borneo.	[77, 70, 82]	76.3333	[-0.15735323820123828, -1.1657187729600478, 0.6405984906688512]	-0.2274911734974783	-0.48373547196388245
5187	They cast the condemnatory editorials in the aftermath of the lynching as "Holier than thou" remarks.	Sie warfen die Verurteilung Leitartikel in der Nachfolge der lynching als "Holier than you" Bemerkungen.	[71, 85, 73]	76.3333	[-1.1024123569313533, 0.4310128033135338, -0.49690580123975703]	-0.3894351182858588	-0.49003565311431885
5201	In 2008 the Czech Republic posthumously promoted Bryks to Brigadier General.	Im Jahr 2008 wurde Bryks von der Tschechischen Republik posthum zum Brigadegeneral bef√∂rdert.	[74, 83, 72]	76.3333	[-0.6270457621312975, 0.2408406579210431, -0.719843458479854]	-0.36868285423003616	-0.29899463057518005
5973	Optimus Prime, who tracked them, soon arrives and combats them.	Optimus Prime, der sie verfolgt hat, kommt bald und bek√§mpft sie.	[83, 75, 71]	76.3333	[0.28848093670226876, -0.05103048675956321, -1.1024123569313533]	-0.2883206356628826	-0.27225616574287415
6048	Also included were infielders Jonathan Rodriguez, David Washington, Jacob Wilson and Patrick Wisdom and outfielder Jeremy Hazelbaker.	Dazu geh√∂rten auch die Infeldspieler Jonathan Rodriguez, David Washington, Jacob Wilson und Patrick Wisdom sowie der Au√üenfeldspieler Jeremy Hazelbaker.	[88, 70, 71]	76.3333	[0.6756935494242516, -1.2608678885313718, -0.9427811157199508]	-0.509318484942357	-0.2716970443725586
6547	This uranium occurrence near Delitzsch consists of several separate mineralisations.	Dieses Uran-Vorkommen bei Delitzsch besteht aus mehreren getrennten Mineralisierungen.	[79, 78, 72]	76.3333	[-0.00874184656673593, 0.6177824849607275, -0.9439568253313346]	-0.11163872897911435	-0.3202304244041443
6777	Nick Willhite, 67, American baseball pitcher, cancer.	Nick Willhite, 67, amerikanischer Baseballkrug, Krebs.	[74, 71, 84]	76.3333	[-0.614933996345165, -0.9427811157199508, 0.9575095538688884]	-0.20006851939874248	-0.18667449057102203
3508	On the March 9 Raw, he wrestled Triple H to a no contest.	Am 9. M√§rz k√§mpfte er mit dem Triple H zu einem No Contest.	[100, 100, 83, 70, 46, 60]	76.5	[0.2654514735602496, 0.37321150863630664, 0.2408406579210431, -0.08666500991321746, -1.0308017456860843, -0.3435374010636478]	-0.09691675275755836	-0.5519115328788757
3813	An insect molts when it outgrows its exoskeleton, which does not stretch and would otherwise restrict the insect's growth.	Ein Insekt schimmelt, wenn es sein Exoskelett √ºberwuchert, das sich nicht dehnt und sonst das Wachstum des Insekts einschr√§nkt.	[100, 100, 99, 45, 45, 70]	76.5	[0.2654514735602496, 0.37321150863630664, 1.7622178210609687, -1.093568436216858, -1.072390086629876, 0.017024862353596727]	0.04199119046073127	-0.3693344295024872
4408	Four tornadoes touched down in Tennessee and extreme southern Kentucky.	Vier Tornados landeten in Tennessee und im √§u√üersten S√ºden Kentucky.	[100, 78, 86, 55, 80, 60]	76.5	[0.2654514735602496, -0.23458970556018363, -0.4022814813405768, -0.6908070656954018, 0.3832018464028281, -0.3435374010636478]	-0.17042705561612204	-0.29890814423561096
6327	The aviary features lesser flamingos, Guinea fowl, storks, hammerkops, and other African birds.	Die Voliere besteht aus kleineren Flamingos, Guineev√∂geln, St√∂rchen, Hammerkops und anderen afrikanischen V√∂geln.	[100, 71, 97, 50, 66, 75]	76.5	[0.2654514735602496, -0.9001922144339011, 0.5820718190378574, -0.89218775095613, -0.19903492681025348, 0.197305994062219]	-0.15776426758999307	-0.3110250234603882
146	Applying the tactic of feigned retreat, they ambushed the crusaders and captured Baldwin and Joscelin.	Unter Anwendung der Taktik des vorget√§uschten R√ºckzugs √ºberfielen sie die Kreuzfahrer und eroberten Baldwin und Joscelin.	[88, 83, 59]	76.6667	[0.6756935494242516, 0.7990540222688698, -3.572122451471585]	-0.6991249599261544	-0.31199780106544495
655	Evangelical abolitionists founded some colleges, most notably Bates College in Maine and Oberlin College in Ohio.	Evangelische Abolitionisten gr√ºndeten einige Colleges, insbesondere das Bates College in Maine und das Oberlin College in Ohio.	[77, 65, 88]	76.6667	[-0.15167916733124173, -1.6419599044306112, -0.2233081539990433]	-0.6723157419202987	-0.1723816990852356
725	The west fa√ßade of the cathedral comprises two great spires and a magnificent portal with a series of angels decorating the arch's voussoirs.	Die Westfassade der Kathedrale besteht aus zwei gro√üen T√ºrmen und einem pr√§chtigen Portal mit einer Reihe von Engeln, die die Voussoirs des Bogens schm√ºcken.	[63, 81, 86]	76.6667	[-2.3700566097315017, -0.31646250428480954, -0.4022814813405768]	-1029600198452290	-0.2907507121562958
817	Motorcyclist Bradley Smith competed in the Red Bull Indianapolis GP, with best finish of second in 2009.	Der Motorradfahrer Bradley Smith fuhr beim Red Bull Indianapolis GP an, mit dem besten zweiten Platz im Jahr 2009.	[65, 77, 88]	76.6667	[-2.0531455465314647, -0.6478368543212599, -0.2233081539990433]	-0.9747635182839226	-0.5458833575248718
845	At the Battle of Ong Thanh in 1967 they sprung another ambush, inflicting heavy casualties on American troops.	In der Schlacht von Ong Thanh 1967 entbrannten sie einem weiteren Hinterhalt, der den amerikanischen Truppen schwere Opfer forderte.	[72, 68, 90]	76.6667	[-0.9439568253313346, -1.3934291419032734, -0.0443348266575098]	-0.7939069312973727	-0.48212990164756775
986	The Protestants called him the King of the Jesuits, and Sigismund gloried in the appellation.	Die Protestanten nannten ihn den K√∂nig der Jesuiten, und Sigismund verherrlichte in der Appellation.	[76, 80, 74]	76.6667	[-0.23165893401848944, 1.0636577994409213, -0.6270457621312975]	0.06831770109704478	-0.25031986832618713
1556	Vermigli weighed in again on Eucharistic controversy in England in 1559.	Vermigli wog wieder auf eucharistische Kontroverse in England im Jahr 1559.	[90, 63, 77]	76.6667	[-0.0443348266575098, -1.6608807960038638, -0.3129034373523029]	-0.6727063533378922	-0.3717484772205353
1822	Thorne extracted a confession from Anthony, which Macy overheard.	Thorne extrahierte ein Gest√§ndnis von Anthony, das Macy h√∂rte.	[77, 69, 84]	76.6667	[-1.8873338990185842, -1.4193234201313905, 0.33592673061728845]	-0.9902435295108952	-0.309857040643692
2035	Smith and starring Denys Hawthorne as Valentine, Michael N. Harbour as Proteus, Judi Dench as Julia and Kate Coleridge as Silvia.	Smith mit Denys Hawthorne als Valentine, Michael N. Harbour als Proteus, Judi Dench als Julia und Kate Coleridge als Silvia.	[83, 70, 77]	76.6667	[0.28848093670226876, -1.1657187729600478, -0.15167916733124173]	-0.3429723345296736	-0.15558278560638428
2045	The Kremlin dismissed the Inquiry as "a joke" and "whitewash".	Der Kreml wies die Untersuchung als "Witz" und "Whitewash" ab.	[77, 69, 84]	76.6667	[-1.8873338990185842, -0.720244941698305, 0.9575095538688884]	-0.5500230956160003	-0.2960623800754547
2079	Under this they wore a white waistcoat and either blue or brown trousers.	Darunter trugen sie eine wei√üe Weste und entweder blaue oder braune Hose.	[85, 74, 71]	76.6667	[0.43709232833677114, -0.27396814399966013, -1.1024123569313533]	-0.3130960575314141	-0.35896193981170654
2204	The WHO only recommends antibiotics in those with severe dehydration.	Die WHO empfiehlt Antibiotika nur bei Patienten mit starker Dehydratation.	[75, 74, 81]	76.6667	[-0.5198479236489196, -0.27396814399966013, 0.4821429590688326]	-0.10389103619324903	-0.36200931668281555
2524	The convoys departed under the protection of British cruisers and destroyers.	Die Konvois fuhren unter dem Schutz britischer Kreuzer und Zerst√∂rer ab.	[77, 78, 75]	76.6667	[-0.32967577825642896, 0.6177824849607275, -0.4685902305312789]	-0.06016117460899345	-0.2635715901851654
2647	The cyclone degenerated into a remnant low soon thereafter and ultimately dissipated just off the coast of Sinaloa, Mexico, on November 29.	Der Zyklon degenerierte sich bald darauf in einen √úberrest-Tiefstand und verschwand am 29. November kurz vor der K√ºste von Sinaloa, Mexiko.	[82, 74, 74]	76.6667	[0.14575458522479776, -0.27396814399966013, -0.6270457621312975]	-0.25175310696871994	-0.5289904475212097
2778	A handful of forces rallied in Masindi to plan a counterattack to retake Kampala.	Eine Handvoll Kr√§fte versammelten sich in Masindi, um einen Gegenangriff zu planen, um Kampala zur√ºckzuerobern.	[74, 82, 74]	76.6667	[-0.614933996345165, 0.031867639766508006, -0.6270457621312975]	-0.40337070623665144	-0.23895490169525146
3088	The Granma ran aground in a mangrove swamp at Playa Las Coloradas, close to Los Cayuelos, on 2 December 1956.	Die Granma landete am 2. Dezember 1956 in einem Mangrovensumpfgebiet am Playa Las Coloradas in der N√§he von Los Cayuelos.	[100, 90, 73, 50, 77, 70]	76.6667	[0.2654514735602496, -0.0443348266575098, -0.7100200690414104, -0.89218775095613, 0.2584368235714535, 0.017024862353596727]	-0.18427158119495837	-0.3566022515296936
3313	Large shrubs in this shrubbery area include Cotoneaster sp.	Zu den gro√üen Str√§uchern in diesem Buschgebiet geh√∂rt auch der Zwereaster sp.	[88, 58, 84]	76.6667	[-0.2233081539990433, -2.1363111594850905, 0.134417580881137]	-0.7417339108676656	-0.6008127331733704
3900	She replenished, loaded ammunition and repaired mount #5.	Sie f√ºllte, lud Munition und reparierte Halterung # 5.	[84, 76, 70]	76.6667	[-0.5812548086821103, 0.1719071704805337, -0.9952782871301464]	-0.46820864177724103	-0.40155014395713806
3948	Louisa, daughter of Richard Molesworth, 3rd Viscount Molesworth, and widow of William Ponsonby, 1st Baron Ponsonby, in 1823.	Louisa, Tochter von Richard Molesworth, 3. Viscount Molesworth und Witwe von William Ponsonby, 1. Baron Ponsonby, 1823.	[78, 75, 77]	76.6667	[-0.23458970556018363, -0.4685902305312789, -1.8873338990185842]	-0.8635046117033488	-0.1138296127319336
4176	The story arc Superman Reborn smooths over the discrepancies between the two versions of Superman and Lois Lane.	Der Erz√§hlbogen Superman Reborn gl√§ttet die Diskrepanzen zwischen den beiden Versionen von Superman und Lois Lane.	[75, 83, 72]	76.6667	[-0.4685902305312789, 0.2408406579210431, -0.719843458479854]	-0.3158643436966966	-0.24279630184173584
4312	Other Burr operatives included William P. Van Ness and John Swartwout, the latter of whom dueled with De Witt Clinton in 1802 in New Jersey.	Zu den anderen Burr-Aktivisten z√§hlten William P. Van Ness und John Swartwout, von denen dieser sich 1802 in New Jersey mit De Witt Clinton duckte.	[85, 68, 77]	76.6667	[0.4310128033135338, -2.0130414274143784, -0.6127649914292829]	-0.7315978718433759	-0.3510248064994812
4557	In 1996, Carter joined the Hot Boys along with rappers Juvenile, B.G., and Turk.	1996 kam Carter zusammen mit Rapper Juvenile, B.G. und Turk zu den Hot Boys.	[77, 84, 69]	76.6667	[-1.8873338990185842, 0.33592673061728845, -0.720244941698305]	-0.7572173700332003	-0.29515016078948975
5105	On June 12, 1952, Aaron signed with Braves' scout Dewey Griggs.	Am 12. Juni 1952 unterzeichnete Aaron mit dem Pfadfinder Dewey Griggs von Braves.	[75, 85, 70]	76.6667	[-0.5198479236489196, 0.35378059459537986, -1.2608678885313718]	-0.47564507252830385	-0.21133768558502197
5343	Maria then ends her engagement with Luke, which also devastates him.	Maria beendet dann ihre Verlobung mit Lukas, die ihn ebenfalls verw√ºstet.	[78, 70, 82]	76.6667	[-0.23458970556018363, -1.1657187729600478, 0.6405984906688512]	-0.2532366626171267	-0.4411127269268036
5430	Looking fully recovered from earlier concussions, Dickenson went 27 for 37 with three touchdowns and no interceptions.	Ausgehend von fr√ºheren Auswirkungen erholt, Dickenson ging 27 f√ºr 37 mit drei Touchdowns und keine Abh√∂rungen.	[65, 88, 77]	76.6667	[-2.2815014184266786, 0.7162710214022698, -0.6127649914292829]	-0.7259984628178971	-0.3606414794921875
5624	During Abu Bakr's era, he actively participated as his secretary and main adviser.	W√§hrend Abu Bakrs √Ñra nahm er aktiv als Sekret√§r und Hauptberater teil.	[81, 76, 73]	76.6667	[0.13986954506776642, 0.1719071704805337, -0.785501293731316]	-0.15790819272767198	-0.3539373278617859
6429	He overdosed on barbiturates, and cut an artery in his right arm with a razor blade.	Er √ºberdosiert Barbiturate und schneidet eine Arterie in seinem rechten Arm mit einer Rasierklinge.	[78, 91, 61]	76.6667	[0.006776364268776851, -0.37993944549444536, -1.3462443712772572]	-0.5731358175009752	-0.3264928162097931
6465	Anticipating this imminent offensive action, Stuart ordered his tired troopers back into bivouac around Brandy Station.	Im Vorgriff auf diese bevorstehende offensive Aktion befahl Stuart seinen m√ºden Truppen, wieder in Biwak um Brandy Station zu gehen.	[80, 89, 61]	76.6667	[-0.04441756016769294, -0.13382149032827656, -1.9024041152942153]	-0.6935477219300616	-0.5410578846931458
6581	mcen221.4 cruel pain and a powerful spasm sei3ed her.	mcen221.4 grausame Schmerzen und ein m√§chtiger Kr√§mpfe ergriff sie.	[69, 84, 77]	76.6667	[-1.4193234201313905, 0.33592673061728845, -1.8873338990185842]	-0.9902435295108954	-0.34686020016670227
6867	They closely resemble the bacterial 70S ribosome and not the 80S cytoplasmic ribosomes, which are coded for by nuclear DNA.	Sie √§hneln dem bakteriellen 70S-Ribosom und nicht den 80S-zytoplasmischen Ribosomen, die durch nukleare DNA kodiert sind.	[81, 77, 72]	76.6667	[0.13986954506776642, 0.3948448277206306, -0.9439568253313346]	-0.13641415084764585	-0.28798484802246094
6943	Colonel of the Army and Honorary Chamberlain of Princess Madame Marie Ad√©la√Øde of France.	Oberst der Armee und Ehrenkammerin von Prinzessin Madame Marie Ad√©la√Øde von Frankreich.	[100, 93, 79, 50, 68, 70]	76.6667	[0.2654514735602496, 0.22412516435479046, -0.13950363286393827, -0.89218775095613, -0.11585824492267038, 0.017024862353596727]	-0.10682468807901697	-0.2618635296821594
3426	Bromeliads collect moisture from rain and humidity in the bases of their leaves, which also nurture frogs, lizards and various insects.	Bromelien sammeln Feuchtigkeit aus Regen und Feuchtigkeit in den Bl√§ttern, die auch Fr√∂sche, Eidechsen und verschiedene Insekten n√§hren.	[100, 92, 85, 68, 56, 60]	76.8333	[0.2654514735602496, 0.1346385006840237, 0.4310128033135338, -0.1672172840175087, -0.6149183362481689, -0.3435374010636478]	-0.04909504062858639	-0.30999428033828735
6122	Chimaeras differ from other cartilagenous fish, having lost both the spiracle and the fifth gill slit.	Chimaeras unterscheiden sich von anderen kartilagenen Fischen, da sie sowohl das Wunder als auch den f√ºnften Kiemenschlitz verloren haben.	[100, 100, 84, 67, 55, 55]	76.8333	[0.2654514735602496, 0.37321150863630664, 0.33592673061728845, -0.20749342106965435, -0.6565066771919604, -0.5238185327722701]	-0.06887148637000669	-0.3476792275905609
213	Young then participated in a feud with Rellik, losing to Rellik on Impact!.	Junge dann nahm an einer Fehde mit Rellik, verlieren Rellik auf Impact!.	[82, 73, 76]	77	[0.14575458522479776, -0.49690580123975703, -0.31013469893126033]	-0.22042863831540652	-0.33748123049736023
474	2005 Les Soir√©es de Mercure 2nd edition, Galerie Weiller, Paris, France.	2005 Les Soir√©es de Mercure 2nd edition, Galerie Weiller, Paris, Frankreich.	[82, 76, 73]	77	[0.6405984906688512, -0.4247618509526743, -0.49690580123975703]	-0.09368972050786005	-0.08815258741378784
562	On the ensuing kickoff to Oklahoma, returner Juaquin Iglesias fumbled the ball and Missouri recovered on Oklahoma's 46 yard line.	Am darauffolgenden Start nach Oklahoma fummelte der R√ºckkehrer Juaquin Iglesias den Ball und Missouri erholte sich auf Oklahomas 46 Yard Line.	[90, 77, 64]	77	[0.9064431667947606, -0.2741483157955598, -1.0297319696340956]	-0.13247903954496495	-0.3133116662502289
692	In 2012, Southern Columbia High School 11th graders ranked 3rd out of 18 high schools in the CSIU 16 region for math achievement.	Im Jahr 2012 belegte Southern Columbia High School den 3. Platz von 18 High Schools in der CSIU 16 Region f√ºr mathematische Leistungen.	[77, 66, 88]	77	[-0.15167916733124173, -1.5591163169214985, -0.2233081539990433]	-0.6447012127505946	-0.48871731758117676
796	Crook dispatched the third brigade under Colonel Carr B.	Crook schickte die dritte Brigade unter Oberst Carr B.	[84, 75, 72]	77	[0.24647627631908922, -0.4685902305312789, -0.719843458479854]	-0.31398580423068123	-0.18838657438755035
967	Two days later Louis XVI banished Necker by a lettre de cachet for his very public exchange of pamphlets.	Zwei Tage sp√§ter verbannte Louis XVI Necker durch einen Briefkasten f√ºr seinen sehr √∂ffentlichen Austausch von Brosch√ºren.	[85, 76, 70]	77	[0.4310128033135338, 0.1719071704805337, -1.2608678885313718]	-0.21931597157910143	-0.4745427966117859
1031	Jardine nevertheless won praise from Wisden for his captaincy and his batting.	Dennoch erhielt Jardine Lob von Wisden f√ºr seine Kapit√§ne und seine Schl√§ge.	[93, 72, 66]	77	[0.22412516435479046, -0.8051061417376557, -0.9302329440642391]	-0.5037379738157014	-0.4844692051410675
1457	He also gradually extended his investments into the prebendary holdings.	Nach und nach erweiterte er auch seine Investitionen in die pr√§bend√§ren Betriebe.	[88, 69, 74]	77	[0.6756935494242516, -1.4193234201313905, -0.27396814399966013]	-0.3391993382355996	-0.5684508085250854
1504	In that era, offences punishable by caning were similar to those punishable by birching or flogging in England and Wales.	In dieser Zeit waren Straftaten, die mit Stacheln geahndet wurden, denen √§hnlich, die mit Birken oder Auspeitschen in England und Wales geahndet wurden.	[77, 73, 81]	77	[-0.48107322703145927, -0.7100200690414104, -0.8497147996944105]	-0.6802693652557602	-0.4819474518299103
1627	The religious orders began retaking Philippine parishes.	Die Ordensgemeinschaften begannen philippinische Pfarreien zur√ºckzuerobern.	[89, 65, 77]	77	[-0.13382149032827656, -1.4707086506113731, -0.3129034373523029]	-0.6391445260973175	-0.3765124976634979
2025	They will sometimes deliberately consume insects such as cicadas as well.	Manchmal fressen sie auch absichtlich Insekten wie Zikaden.	[84, 76, 71]	77	[0.33592673061728845, 0.1719071704805337, -1.1024123569313533]	-0.19819281861117707	-0.4085257649421692
2087	When the bonfire burnt down, they scattered the ashes, vying with each other who should scatter them most.	Als das Feuer brannte, zerstreuten sie die Asche und stritten miteinander, wer sie am meisten zerstreuen sollte.	[77, 83, 71]	77	[-1.8873338990185842, 0.2408406579210431, -1.1024123569313533]	-0.9163018660096315	-0.30952706933021545
2160	The bumping continued with Willy T. Ribbs posting a solid run of 217.711 mph to bump Olivier Grouillard.	Das Bumping fortgesetzt mit Willy T. Ribbs Entsendung einer soliden Lauf von 217,711 mph auf Olivier Grouillard bump.	[84, 70, 77]	77	[0.33592673061728845, -1.8340681000728447, -0.6127649914292829]	-0.7036354536282797	-0.33248868584632874
2365	Bradford interrupts and rebukes his townsmen, welcoming the newcomers and even promising Pence shelter in his own house.	Bradford unterbricht und tadelt seine Stadtbewohner, empf√§ngt die Neuank√∂mmlinge und verspricht sogar Pence Schutz in seinem eigenen Haus.	[73, 81, 77]	77	[-0.7100200690414104, -0.05110000284418722, -0.3129034373523029]	-0.3580078364126335	-0.3429136872291565
4372	The N7 originates from the N1 at Wingfield Interchange near Edgemead.	Die N7 stammt aus der N1 am Wingfield Interchange bei Edgemead.	[87, 74, 70]	77	[-0.31279481766981004, -0.27396814399966013, -0.9952782871301464]	-0.5273470829332055	-0.21072590351104736
4670	The statutes are enforced by local police, sheriffs and deputy sheriffs, and constables and deputy constables.	Die Statuten werden von der lokalen Polizei, Sheriffs und stellvertretenden Sheriffs, sowie Konstallationen und stellvertretenden Konstallationen durchgesetzt.	[78, 82, 71]	77	[-0.23458970556018363, 1.5095331139211152, -1.1024123569313533]	0.05751035047652612	-0.38941171765327454
5617	Aurora sailed for New Zealand in 1839 under Captain Theophilus Heale.	Aurora segelte 1839 unter Captain Theophilus Heale nach Neuseeland.	[77, 85, 69]	77	[-0.32967577825642896, 0.35378059459537986, -1.4193234201313905]	-0.46507286793081315	-0.16180871427059174
5762	Count de Loredani cannot satisfy his wife, who elopes.	Graf de Loredani kann seine Frau, die lockt, nicht befriedigen.	[76, 78, 77]	77	[-1.2971481180482443, -0.23458970556018363, -0.6127649914292829]	-0.714834271679237	-0.3062739968299866
5864	A female battalion from the National Guard defended the Place Blanche during the repression.	Eine Bataillonin der Nationalgarde verteidigte den Place Blanche w√§hrend der Repression.	[100, 91, 81, 65, 75, 50]	77	[0.2654514735602496, 0.04515183701325695, 0.05066851252855241, -0.28804569517394557, 0.1752601416838704, -0.7040996644808922]	-0.07593556581148474	-0.3268723785877228
6950	He speculates that this probing may represent a biopsy of the olfactory mucous membrane.	Er spekuliert, dass diese Untersuchung eine Biopsie der olfaktorischen Schleimhaut darstellen kann.	[85, 70, 76]	77	[0.35378059459537986, -1.2608678885313718, 0.1719071704805337]	-0.24506004115181942	-0.23446881771087646
253	They do this by transporting and metabolising the thyroglobulin contained in the colloid.	Dazu transportieren und metabolisieren sie das in der Kolloide enthaltene Thyroglobulin.	[79, 72, 81]	77.3333	[-0.00874184656673593, -0.719843458479854, 0.4821429590688326]	-0.08214744865925244	-0.37632861733436584
633	There were ecclesiastical petitions, and those from the shires dealt mainly in annulling debts and amercements of both individuals and towns.	Es gab kirchliche Petitionen, und jene aus den Schrecken befassten sich haupts√§chlich mit der Annullierung von Schulden und Amercements sowohl von Einzelpersonen als auch von St√§dten.	[85, 74, 73]	77.3333	[0.35378059459537986, -0.6270457621312975, -0.49690580123975703]	-0.2567236562585582	-0.500597357749939
755	Major Lewis Merrill and Captain Frederick Benteen, a veteran of the Little Bighorn, each led a battalion of the 7th.	Major Lewis Merrill und Captain Frederick Benteen, ein Veteran des Little Bighorn, f√ºhrten jeweils ein Bataillon des 7. Jahrhunderts.	[69, 73, 90]	77.3333	[-1.4193234201313905, -0.9792112043577104, -0.0443348266575098]	-0.8142898170488703	-0.22614575922489166
1321	He resigned on June 20, handing the reins to Karl Buresch, who could.	Er trat am 20. Juni zur√ºck und √ºbergab die Z√ºgel Karl Buresch, der konnte.	[89, 79, 64]	77.3333	[-0.13382149032827656, -0.13950363286393827, -1.0297319696340956]	-0.43435236427543683	-0.31605595350265503
1359	The 1996 Khobar Towers bombing, killing 19 US servicemen.	Die Khobar Towers von 1996 bombardierten 19 US-Soldaten.	[71, 84, 77]	77.3333	[-1.1024123569313533, 0.33592673061728845, 0.3948448277206306]	-0.12388026619781144	-0.27531176805496216
1552	Emilio Aguinaldo immediately rushed to the hospital, clad only in his pajamas.	Emilio Aguinaldo eilte sofort ins Krankenhaus, nur in den Pyjama gekleidet.	[90, 77, 65]	77.3333	[-0.0443348266575098, -0.32967577825642896, -0.974591313304727]	-0.4495339727395553	-0.3178260922431946
1666	Such archaizing was a common literary topos, and implied similar geographic origins and nomadic lifestyle but not direct filiation.	Eine solche Archaisierung war ein gemeinsamer literarischer Topos und implizierte √§hnliche geografische Urspr√ºnge und nomadischen Lebensstil, aber nicht direkte Filiation.	[85, 70, 77]	77.3333	[0.35378059459537986, -1.2608678885313718, 0.3948448277206306]	-0.17074748873845377	-0.40576204657554626
1687	Bracher accused both J√ºrgen Habermas and Ernst Nolte of both "...tabooing the concept of totalitarianism and inflating the formula of fascism".	Bracher beschuldigte sowohl J√ºrgen Habermas als auch Ernst Nolte, "das Konzept des Totalitarismus tabuisiert und die Formel des Faschismus aufgeblasen zu haben".	[79, 78, 75]	77.3333	[0.16523189586879544, -0.23458970556018363, -0.05103048675956321]	-0.04012943215031713	-0.3294902741909027
2303	In securing the previous stitch in a wale, the next stitch can pass through the previous loop from either below or above.	Bei der Sicherung der vorherigen Stich in einem Wale, kann die n√§chste Stich durch die vorherige Schleife von unten oder oben passieren.	[85, 80, 67]	77.3333	[0.4310128033135338, 1.0636577994409213, -1.7362344833314276]	-0.08052129352565747	-0.41591623425483704
4212	Dreadnought designs experimented with different layouts.	Dreadnought Designs experimentiert mit verschiedenen Layouts.	[87, 75, 70]	77.3333	[-0.31279481766981004, -0.5198479236489196, -1.139524360883304]	-0.6573890340673446	-0.2017088085412979
4768	She defeated Anna Tatishvili and Monica Puig before losing to Anastasia Pavlyuchenkova in the quarterfinals.	Sie besiegte Anna Tatishvili und Monica Puig, bevor sie Anastasia Pavlyuchenkova im Viertelfinale verlor.	[88, 100, 95, 68, 53, 60]	77.3333	[0.7162710214022698, 0.2654514735602496, 0.40309849169632395, -0.1672172840175087, -0.7396833590795435, -0.3435374010636478]	0.022397157083023894	-0.16253280639648438
6004	With Nova Prime and Jhiaxus gone, Omega Supreme imprisons Monstructor.	Nachdem Nova Prime und Jhiaxus verschwunden sind, inhaftiert Omega Supreme Monstructor.	[80, 81, 71]	77.3333	[-0.04441756016769294, 1.2865954566810183, -1.1024123569313533]	0.046588513193990634	-0.29699429869651794
6403	To examine Fresnel's first memoir and supplements on double refraction, the Acad√©mie des Sciences appointed Amp√®re, Arago, Fourier, and Poisson.	Um Fresnel 's erste Memoiren und Erg√§nzungen zur Doppelbrechung zu untersuchen, ernannte die Acad√©mie des Sciences Amp√®re, Arago, Fourier und Poisson.	[81, 70, 81]	77.3333	[0.05066851252855241, -1.8340681000728447, -0.3853798995650292]	-0.7229264957031072	-0.19789956510066986
6492	Under this banner, the Ice Road Truckers show garnered very good ratings.	Unter diesem Banner haben die Ice Road Truckers sehr gute Bewertungen erhalten.	[77, 81, 74]	77.3333	[-0.15167916733124173, 0.05066851252855241, -0.27396814399966013]	-0.1249929329341165	-0.42386579513549805
4246	Because of the relationship of the former housemate Cora.	Wegen der Beziehung des ehemaligen Housemate Cora.	[100, 100, 100, 51, 66, 48]	77.5	[0.2654514735602496, 0.8505318100501577, 0.37321150863630664, -0.8519116139039844, -0.19903492681025348, -0.7762121171643411]	-0.05632731093864418	-0.3942868113517761
241	Burgoyne would later blame La Corne for deserting him, while La Corne countered that Burgoyne never respected the Indians.	Burgoyne w√ºrde sp√§ter La Corne beschuldigen, ihn verlassen zu haben, w√§hrend La Corne konterkarierte, dass Burgoyne die Indianer nie respektierte.	[100, 100, 80, 51, 70, 65]	77.6667	[0.2654514735602496, 0.37321150863630664, -0.04441756016769294, -0.8519116139039844, -0.032681563035087305, -0.16325626935502552]	-0.07560067071087231	-0.4135507345199585
968	In 1681 he instituted the policy of dragonnades, to intimidate Huguenot families to convert to Roman Catholicism or emigrate.	Im Jahre 1681 leitete er die Politik der Dragonnaden ein, um hugenottische Familien einzusch√ºchtern, sich zum Katholizismus zu bekehren oder auszuwandern.	[75, 65, 93]	77.6667	[-0.4685902305312789, -1.6419599044306112, 0.22412516435479046]	-0.6288083235356998	-0.3654569983482361
1132	Goblin spirituality revolves around unggue, the collection of bodily secretions such as earwax in magical pots.	Goblin Spiritualit√§t dreht sich um unggue, die Sammlung von k√∂rperlichen Sekrete wie Ohrenwachs in magische T√∂pfe.	[83, 75, 75]	77.6667	[-0.6707414723528771, -0.05103048675956321, -0.5198479236489196]	-0.41387329425378666	-0.31684571504592896
1183	Illingworth edged Simpson into Harvey's hands for a duck.	Illingworth eingefasst Simpson in Harvey 's H√§nde f√ºr eine Ente.	[92, 73, 68]	77.6667	[0.1346385006840237, -0.49690580123975703, -1.1854504325226372]	-0.5159059110261235	-0.2842859625816345
1215	During the feud, Gangrel introduced Christian, Edge's storyline brother, as his ally.	W√§hrend der Fehde stellte Gangrel Christian, Edge 's Storyline Bruder, als seinen Verb√ºndeten vor.	[90, 65, 78]	77.6667	[-0.0443348266575098, -2.2804070591605323, -0.23458970556018363]	-0.8531105304594085	-0.20385436713695526
1487	John Chiles led the Longhorns with 54 yards on 9 carries.	John Chiles f√ºhrte die Longhorns mit 54 Yards auf 9 Tr√§gern.	[84, 76, 73]	77.6667	[-0.5812548086821103, 0.1719071704805337, -0.7100200690414104]	-0.3731225690809956	-0.24390313029289246
1662	Headlines branded Netanyahu a "liar" and dubbed the affair a "fiasco".	Schlagzeilen nannten Netanjahu einen "L√ºgner" und nannten die Aff√§re ein "Fiasko".	[81, 74, 78]	77.6667	[0.13986954506776642, -0.27396814399966013, 0.006776364268776851]	-0.04244074488770563	-0.30215567350387573
1911	A pathway traverses the island in the low saddle area of the lazaret.	Ein Pfad durchquert die Insel im flachen Sattelbereich des Lazarets.	[85, 72, 76]	77.6667	[0.35378059459537986, -0.9439568253313346, 0.1719071704805337]	-0.13942302008514038	-0.4647694230079651
2056	Fossilized bryozoans and tiny shells, or ooids, make the limestone porous.	Fossilized bryozoans und winzige Muscheln oder Ooide, machen den Kalkstein por√∂s.	[77, 84, 72]	77.6667	[-0.15167916733124173, 0.33592673061728845, -0.719843458479854]	-0.17853196506460242	-0.3177928328514099
2622	He opposes zealously the idea of God, and preaches revolt against Him."	Er widersetzt sich eifrig der Vorstellung Gottes und predigt Aufstand gegen ihn ".	[77, 79, 77]	77.6667	[-0.15735323820123828, 0.8407201422008245, -0.15167916733124173]	0.17722924555611483	-0.307849645614624
2793	For pregnancy 100 mg/day; for lactation 155 mg/day.	F√ºr Schwangerschaft 100 mg / Tag; f√ºr Stillzeit 155 mg / Tag.	[100, 78, 100, 60, 68, 60]	77.6667	[0.2654514735602496, -0.23458970556018363, 0.8505318100501577, -0.48942638043467374, -0.11585824492267038, -0.3435374010636478]	-0.01123807472846137	-0.2554781436920166
2840	Mr Paxman likened the dominance of Scots at Westminster to past British rule in India.	Herr Paxman verglich die Dominanz der Schotten in Westminster mit der fr√ºheren britischen Herrschaft in Indien.	[84, 71, 78]	77.6667	[0.24647627631908922, -1.1024123569313533, 0.6177824849607275]	-0.07938453188384553	-0.2499416470527649
2942	However, in western China the mosques resemble those of the middle east, with tall, slender minarets, curvy arches and dome shaped roofs.	Im Westen Chinas √§hneln die Moscheen denen des Mittleren Ostens, mit hohen, schlanken Minaretten, kurvigen B√∂gen und kuppelf√∂rmigen D√§chern.	[87, 73, 73]	77.6667	[0.568389231147961, -0.785501293731316, -0.49690580123975703]	-0.23800595460770402	-0.28464755415916443
3171	Concerned that they might try and enslave the Indians she ascends into the Oracle.	In Sorge, dass sie versuchen k√∂nnten, die Indianer zu versklaven, steigt sie in das Orakel auf.	[81, 74, 78]	77.6667	[0.4821429590688326, -0.614933996345165, 0.6177824849607275]	0.16166381589479836	-0.3844955563545227
3173	One of Thirsk's aides diverts suspicion, posing as a Charisian agent.	Einer der Assistenten von Thirsk lenkt den Verdacht ab und posiert als Charisischer Agent.	[65, 74, 94]	77.6667	[-0.9432932546496776, -0.614933996345165, 0.3136118280255572]	-0.41487180765642845	-0.4582275450229645
3248	Alternative explanations, misconceptions, and controversies	Alternative Erkl√§rungen, Missverst√§ndnisse und Kontroversen	[81, 71, 81]	77.6667	[0.05066851252855241, -0.9427811157199508, 0.4821429590688326]	-0.13665654804085528	-0.17905613780021667
3376	Major lava flows have formed vast plateaus that overlie Paleozoic sandstone.	Gr√∂√üere Lavastr√∂me haben riesige Plateaus gebildet, die pal√§ozoischen Sandstein √ºberragen.	[91, 76, 66]	77.6667	[0.04515183701325695, -0.4247618509526743, -1.4596167900387038]	-0.6130756013260404	-0.4844686686992645
3386	ZOG Ate My Brains, New Internationalist, October 2004.	ZOG Ate My Brains, New Internationalist, Oktober 2004.	[78, 74, 81]	77.6667	[-1.1181747907067108, -0.614933996345165, -0.3853798995650292]	-0.7061628955389683	-0.14455696940422058
4129	First Epistle of John, ascribed to John the Apostle.	Erster Brief des Johannes, dem Apostel Johannes zugeschrieben.	[83, 73, 77]	77.6667	[0.28848093670226876, -0.49690580123975703, -0.15167916733124173]	-0.12003467728957666	-0.34844130277633667
4180	Rule, John C., Louis XIV and the craft of kingship 1969.	Regel, John C., Louis XIV und das Handwerk des K√∂nigtums 1969.	[100, 100, 100, 68, 48, 50]	77.6667	[0.2654514735602496, 0.8505318100501577, 0.37321150863630664, -0.1672172840175087, -0.9476250637985012, -0.7040996644808922]	-0.05495787000836472	-0.2202364206314087
4293	While Laura Morgan from All About Soap branded Josh a "hunky newcomer".	W√§hrend Laura Morgan von All About Soap Josh als "hunky newcomer" markierte.	[83, 71, 79]	77.6667	[0.2408406579210431, -0.9427811157199508, 0.16523189586879544]	-0.17890285397670405	-0.29750967025756836
4381	Ontos Verlag, 2011, Michel Weber, "On Religiousness and Religion.	Ontos Verlag, 2011, Michel Weber, "√úber Religion und Religion.	[85, 77, 71]	77.6667	[0.4310128033135338, 0.3948448277206306, -1.1024123569313533]	-0.0921849086323963	-0.13786530494689941
4518	Deposits were associated with pillow basalts alterered to greenstone.	Ablagerungen wurden mit Kopfkissen Basalt zu Greenstone ver√§ndert assoziiert.	[78, 74, 81]	77.6667	[-0.08304754238398711, -0.27396814399966013, 0.4821429590688326]	0.041709090895061786	-0.3165992796421051
4585	In August 1916, the gendarmes return to Kermanshah.	Im August 1916 kehren die Gendarmen nach Kermanshah zur√ºck.	[81, 72, 80]	77.6667	[0.05066851252855241, -0.719843458479854, 0.323687427468814]	-0.11516250616082918	-0.17438456416130066
5443	He also had one interception, three forced fumbles, and three pass breakups.	Er hatte auch ein Abfangen, drei Zwangsmolken und drei Durchbr√ºche.	[79, 82, 72]	77.6667	[-0.13950363286393827, 0.031867639766508006, -0.9439568253313346]	-0.35053093947625497	-0.47681814432144165
5690	On 1 May 305, both Maximian and Diocletian abdicated, leaving Constantius and Galerius as emperors.	Am 1. Mai 305 verzichteten Maximian und Diokletian und lie√üen Constantius und Galerius als Kaiser zur√ºck.	[88, 73, 72]	77.6667	[-0.2233081539990433, -0.49690580123975703, -0.8051061417376557]	-0.5084400323254853	-0.2841218411922455
5734	The smugglers wounded one of the officers and safely escaped with the contraband.	Die Schmuggler verwundeten einen der Offiziere und flohen sicher mit dem Schmuggel.	[78, 79, 76]	77.6667	[-0.08304754238398711, 0.8407201422008245, -0.31013469893126033]	0.14917930029519233	-0.3215378224849701
6097	Then the male will itself urinate there and sniff at its own scent before leaving.	Dann uriniert das M√§nnchen selbst dort und schn√ºffelt an seinem eigenen Duft, bevor es weggeht.	[88, 74, 71]	77.6667	[0.7162710214022698, -0.27396814399966013, -1.1024123569313533]	-0.22003649317624788	-0.5206940174102783
6237	In the 1931 Azais and Chambard reported 82 stelae from Waheno.	1931 meldeten Azais und Chambard 82 Stelen aus Waheno.	[92, 71, 70]	77.6667	[0.1346385006840237, -0.9001922144339011, -1.139524360883304]	-0.6350260248777272	-0.17373432219028473
6305	Question marks adorning his costuming in the 1980s seem to imply the "Who" moniker.	Fragezeichen, die seine Kost√ºme in den 1980er Jahren schm√ºcken, scheinen den Moniker "Who" zu implizieren.	[72, 93, 68]	77.6667	[-0.9439568253313346, -0.21257256679872272, -0.8261045005564989]	-0.660877964228852	-0.3845701515674591
6734	The Giants acquired outfielder Michael Morse and starting pitcher Tim Hudson in the offseason.	Die Giants erwarb Au√üenfeldspieler Michael Morse und Startkrug Tim Hudson in der Nebensaison.	[87, 81, 65]	77.6667	[-0.31279481766981004, 0.05066851252855241, -1.2949202670220439]	-0.5190155240544339	-0.29547423124313354
6864	The power stroke of the forewing pushes down the hindwing in unison.	Der Kraftanschlag des Stirnfl√ºgels dr√ºckt das Hindernis im Einklang herunter.	[84, 71, 78]	77.6667	[0.33592673061728845, -0.9427811157199508, 0.006776364268776851]	-0.20002600694462855	-0.8180906772613525
4171	For example, Tuareg religious ceremonies contain allusions to matrilineal spirits, as well as to fertility, menstruation, the earth and ancestresses.	Zum Beispiel enthalten Tuareg religi√∂se Zeremonien Anspielungen auf matrilineale Geister, sowie auf Fruchtbarkeit, Menstruation, die Erde und Vorfahren.	[100, 90, 83, 67, 62, 65]	77.8333	[0.2654514735602496, -0.0443348266575098, 0.2408406579210431, -0.20749342106965435, -0.36538829058541966, -0.16325626935502552]	-0.0456967793643861	-0.28194501996040344
174	From Enlightenment to Romanticism in 18th Century Europe Holmes, Richard.	Von Aufkl√§rung zur Romantik im Europa des 18. Jahrhunderts Holmes, Richard.	[85, 78, 71]	78	[0.03978801125824122, -0.23458970556018363, -1.744581436402078]	-0.6464610435680068	-0.2887985110282898
345	The French brutally sacked L√ºbeck during and after the fighting.	Die Franzosen haben L√ºbeck w√§hrend und nach den K√§mpfen brutal entlassen.	[80, 72, 82]	78	[-0.04441756016769294, -0.719843458479854, 0.6405984906688512]	-0.041220842659565236	-0.34302377700805664
400	Thermodynamics and Statistical Mechanics, Oxford University Press, Oxford UK, .	Thermodynamik und Statistische Mechanik, Oxford University Press, Oxford UK,.	[83, 81, 70]	78	[0.1391719580427986, 0.4821429590688326, -1.1657187729600478]	-0.18146795194947218	-0.16196861863136292
834	The court received new hoops, poles, backboards and benches.	Das Gericht erhielt neue Reifen, Stangen, R√ºckw√§nde und B√§nke.	[65, 78, 91]	78	[-2.0531455465314647, -0.5649932668121473, 0.04515183701325695]	-0.8576623254434517	-0.26896801590919495
961	Belfast elected 7 Sinn F√©in, 5 DUP, 2 SDLP, 3 Alliance Party, 1 UUP, 1 Green and 1 PBPA MLAs.	Belfast w√§hlte 7 Sinn F√©in, 5 DUP, 2 SDLP, 3 Alliance Party, 1 UUP, 1 Green und 1 PBPA MLAs.	[73, 72, 89]	78	[-0.785501293731316, -1.062054791866823, -0.13382149032827656]	-0.660459191975472	-0.1284535974264145
1243	The Utah Lake watershed drains 3846 sqmi over mostly mountainous terrain.	Die Utah Lake Wasserscheide entw√§ssert 3846 Quadratkilometer √ºber √ºberwiegend bergiges Gel√§nde.	[84, 72, 78]	78	[0.24647627631908922, -0.9439568253313346, 0.6177824849607275]	-0.02656602135050597	-0.4522632658481598
1415	The latter left a corrosive record of their first encounter, dismissing Ralea as a "clown" with "aristocratic manias".	Letztere hinterlie√üen einen korrosiven Rekord ihrer ersten Begegnung, indem sie Ralea als "Clown" mit "aristokratischen Manias" abwiesen.	[91, 76, 67]	78	[0.04515183701325695, -0.4247618509526743, -0.8643100006459896]	-0.41464000486180236	-0.3478541076183319
1463	They could not, however, prevent around six hundred Turkish reinforcements reaching the redoubt.	Sie konnten jedoch nicht verhindern, dass etwa sechshundert t√ºrkische Verst√§rkungen in Zweifel kommen.	[95, 74, 65]	78	[0.40309849169632395, -0.614933996345165, -0.974591313304727]	-0.39547560598452264	-0.4442559778690338
1478	lathes, drills, gantry crane, mills and grinders etc.	Drehmaschinen, Bohrer, Portalkran, M√ºhlen und Schleifmaschinen usw.	[76, 81, 77]	78	[-0.4247618509526743, -0.0754366785097826, -0.15167916733124173]	-0.21729256559789956	-0.3525731861591339
1767	Bianca thanks Marissa and apologizes for doubting her.	Bianca bedankt sich bei Marissa und entschuldigt sich f√ºr ihren Zweifel.	[92, 75, 67]	78	[0.1346385006840237, -0.5198479236489196, -1.181227721089917]	-0.5221457146849376	-0.2254323959350586
2496	Punk balked at Laurinaitis' promotion and verbally attacked him as a dull yes man.	Punk balkte bei Laurinaitis Promotion und attackierte ihn verbal als dumpfer Ja-Mann.	[86, 76, 72]	78	[0.4610849128716704, -0.31013469893126033, -0.719843458479854]	-0.18963108151314798	-0.47437480092048645
2938	However, Ravenswood grew during the 1870s and 1880s, despite the goldfield's "refractory" ores, and "mundic problem".	Ravenswood wuchs jedoch in den 1870er und 1880er Jahren, trotz der "feuerfesten" Erze des Goldfeldes und des "mundischen Problems".	[90, 82, 62]	78	[-0.0443348266575098, 0.14575458522479776, -1.140013282292833]	-0.3461978412418483	-0.2713839113712311
3112	Langmuir patented the hard vacuum triode, but De Forest and AT&T successfully asserted priority and invalidated the patent.	Langmuir patentierte die harte Vakuumtriode, aber De Forest und AT & T behaupteten erfolgreich Priorit√§t und l√∂sten das Patent aus.	[84, 76, 74]	78	[0.33592673061728845, 0.1719071704805337, -0.6270457621312975]	-0.03973728701115845	-0.32785215973854065
3708	Virginia Rappe suffered from chronic cystitis, a condition that liquor irritated dramatically.	Virginia Rappe litt an chronischer Zystitis, einer Erkrankung, die Alkohol dramatisch reizte.	[83, 78, 73]	78	[0.2408406579210431, 0.6177824849607275, -0.785501293731316]	0.024373949716818166	-0.28466957807540894
4084	Neurons fired in a pattern resembling human neuronal patterns.	Neuronen feuerten in einem Muster, das menschlichen neuronalen Mustern √§hnelt.	[83, 80, 71]	78	[0.1391719580427986, 0.323687427468814, -0.9427811157199508]	-0.15997391006944606	-0.2953502833843231
4143	A monsoon trough spawned Tropical Depression 04W east of the Philippines on May 13.	Ein Monsuntrog verursachte am 13. Mai eine Tropische Depression 04W √∂stlich der Philippinen.	[84, 84, 66]	78	[0.33592673061728845, 0.24647627631908922, -1.894690014931446]	-0.43742900266502277	-0.3540436029434204
4305	Early on October 1, Melor intensified further from a severe tropical storm into a typhoon.	Anfang Oktober intensivierte sich Melor weiter von einem schweren Tropensturm zu einem Taifun.	[80, 76, 78]	78	[-0.04441756016769294, 0.1719071704805337, 0.006776364268776851]	0.0447553248605392	-0.4067164361476898
4706	She often behaved bossy and had a feud with Manuela and Anne.	Sie benahm sich oft bossy und hatte eine Fehde mit Manuela und Anne.	[87, 73, 74]	78	[-0.31279481766981004, -0.49690580123975703, -0.614933996345165]	-0.4748782050849107	-0.34783971309661865
4764	Ismet Bajramoviƒá, 42, Bosnian reputed organized crime figure and wartime commander, suicide by gunshot.	Ismet Bajramoviƒá, 42, bosnischer Angestellter des organisierten Verbrechens und Kriegskommandeur, Selbstmord durch Schuss.	[88, 72, 74]	78	[0.7162710214022698, -0.719843458479854, -0.6270457621312975]	-0.21020606640296055	-0.322588175535202
5063	Poultry includes chickens, ducks, geese, turkeys, and quail.	Gefl√ºgel umfasst H√ºhner, Enten, G√§nse, Truth√§hne und Wachtel.	[83, 70, 81]	78	[0.28848093670226876, -1.1657187729600478, 0.4821429590688326]	-0.1316982923963155	-0.1907658874988556
5077	4th International Biennial of Tapestry, Lausanne, Switzerland.	4. Internationale Biennale f√ºr Tapisserie, Lausanne, Schweiz.	[78, 82, 74]	78	[-1.7937345349934175, 0.6405984906688512, -0.614933996345165]	-0.5893566802232437	-0.26189932227134705
6098	Leslie refuses Martin's apology and confession of his failure at Catherine's graveside.	Leslie lehnt Martins Entschuldigung und Gest√§ndnis seines Scheiterns an Katharinas Grab ab.	[84, 72, 78]	78	[0.24647627631908922, -0.9439568253313346, 0.6177824849607275]	-0.02656602135050597	-0.28385961055755615
6324	Musicologist Henry Pleasants noted, "Vaughan who sings easily down to a contralto low D, ascends to a pure and accurate soprano high C."	Der Musikwissenschaftler Henry Pleasants bemerkte: "Vaughan, der leicht zu einem Contralto low D singt, steigt zu einem reinen und pr√§zisen Sopranhoch C auf".	[73, 93, 68]	78	[-0.785501293731316, -0.21257256679872272, -0.8261045005564989]	-0.6080594536955125	-0.3597601056098938
6404	He also continued to argue that Charles should remarry a Protestant princess, or legitimise James Scott, 1st Duke of Monmouth.	Er argumentierte auch, dass Charles eine protestantische Prinzessin wiederheiraten oder James Scott, 1. Duke of Monmouth, legitimieren sollte.	[72, 92, 70]	78	[-0.8051061417376557, 0.1346385006840237, -1.1053869298342949]	-0.591951523629309	-0.33476775884628296
2923	He has starred in Too Close for Comfort, Spaceballs and Ned's Declassified School Survival Guide.	Er spielte in Too Close for Comfort, Spaceballs und Ned 's Declassified School Survival Guide.	[100, 87, 89, 55, 70, 68]	78.1667	[0.2654514735602496, -0.31279481766981004, 0.8113570940985152, -0.6908070656954018, -0.032681563035087305, -0.05508759032985217]	-0.002427078178564425	-0.23824837803840637
431	Tesla, Nikola, My Inventions, Parts I through V published in the Electrical Experimenter monthly magazine from February through June 1919.	Tesla, Nikola, My Inventions, Parts I bis V erschienen von Februar bis Juni 1919 im Monatsmagazin Electrical Experimenter.	[80, 87, 68]	78.3333	[-0.04441756016769294, 0.568389231147961, -1.577778951731409]	-0.35126909358371367	-0.23184078931808472
599	However, destriers were not as large as draught horses, averaging between and .	Jedoch waren Fu√üg√§nger nicht so gro√ü wie Zugpferde, zwischen und durchschnittlich.	[70, 85, 80]	78.3333	[-1.2608678885313718, 0.4310128033135338, 1.0636577994409213]	0.07793423807436113	-0.49510642886161804
804	34, to impeach President George H. W. Bush for starting the Gulf War.	34, Pr√§sident George H. W. Bush f√ºr den Beginn des Golfkrieges zu verklagen.	[82, 62, 91]	78.3333	[0.14575458522479776, -1.110579489363207, 0.45906575125885857]	-0.16858638429318354	-0.3262927532196045
809	504 and 257 Squadrons engaged the Dorniers with 20 Hurricanes.	504 und 257 Squadrons engagierten die Dorniers mit 20 Hurricanes.	[84, 63, 88]	78.3333	[0.9575095538688884, -1.8076470794488364, -0.2233081539990433]	-0.3578152265263304	-0.2657448947429657
960	In her passion, she stabs Lilla and throws her off a cliff.	In ihrer Leidenschaft stach sie Lilla und warf sie von einer Klippe.	[84, 63, 88]	78.3333	[0.9575095538688884, -1.8076470794488364, -0.2233081539990433]	-0.3578152265263304	-0.35949045419692993
988	The elves move prince Sandalon and the other children to the elf fortress of the Crowed Horns escorted by ten elves and unicorns.	Die Elfen bewegen Prinz Sandalon und die anderen Kinder in die Elfenfestung der von zehn Elfen und Einh√∂rnern begleiteten H√∂rner.	[77, 68, 90]	78.3333	[-0.15167916733124173, -1.3934291419032734, -0.0443348266575098]	-0.5298143786306749	-0.2976498603820801
1290	Nearby archeological digs attest early influences by Chinese, Hindu and Moro traders.	Nahe gelegene arch√§ologische Ausgrabungen belegen fr√ºhe Einfl√ºsse chinesischer, hinduistischer und Moro-H√§ndler.	[91, 77, 67]	78.3333	[0.04515183701325695, -0.32967577825642896, -0.8691339001191329]	-0.38455261378743505	-0.40506333112716675
1507	These early galleys apparently lacked a keel meaning they lacked stiffness along their length.	Diesen fr√ºhen Galeeren fehlte es anscheinend an einem Kiel, was bedeutet, dass ihnen entlang ihrer L√§nge Steifigkeit fehlte.	[83, 78, 74]	78.3333	[0.2408406579210431, 0.6177824849607275, -0.6270457621312975]	0.07719246025015769	-0.4298480153083801
1955	A 720p resolution dupes 1080p but 1080p does not dupe 720p.	Ein 720p Aufl√∂sung dupes 1080p aber 1080p nicht dupe 720p.	[80, 87, 68]	78.3333	[0.323687427468814, -0.31279481766981004, -2.7297281752450844]	-0.9062785218153602	-0.2677127420902252
1968	Officeholders were particularly persistent and socially and economically advantaged.	Die Beamten waren besonders hartn√§ckig und sozial und wirtschaftlich benachteiligt.	[78, 75, 82]	78.3333	[-1.1181747907067108, -0.05103048675956321, 0.14575458522479776]	-0.3411502307471588	-0.4340636134147644
3607	In Angel Heart and Silhouette in Red, Bohlen cited his songwriting credits under the pseudonyms of Steve Benson, Jennifer Blake and Howard Houston.	In Angel Heart und Silhouette in Red zitierte Bohlen seine Songwriting-Credits unter den Pseudonymen Steve Benson, Jennifer Blake und Howard Houston.	[93, 72, 70]	78.3333	[0.22412516435479046, -0.8051061417376557, -1.1053869298342949]	-0.5621226357390534	-0.1514315903186798
3809	Adverting to a new cornet vacancy, Lord William Lennox was duly dispatched to Spain in early 1813.	Anfang 1813 wurde Lord William Lennox nach Spanien entsandt, um eine neue Korallenvakanz anzustreben.	[77, 77, 81]	78.3333	[-1.2076614543774775, 0.3948448277206306, 0.05066851252855241]	-0.2540493713760981	-0.7552629113197327
3891	Beer's correspondents replied around December 1816.	Die Korrespondenten von Beer antworteten um Dezember 1816.	[89, 84, 62]	78.3333	[0.8113570940985152, -0.5812548086821103, -1.110579489363207]	-0.2934924013156007	-0.37639859318733215
4009	Bower leaves, and his club foot reminds Tuppence of the brothers Oakwood.	Bower verl√§sst, und sein Schl√§gerfu√ü erinnert Tuppence an die Br√ºder Oakwood.	[86, 73, 76]	78.3333	[-0.4022814813405768, -0.49690580123975703, -0.4247618509526743]	-0.441316377844336	-0.3005664050579071
4278	Publius Cornelius Merenda, failed candidate to the consulship in 217 BC.	Publius Cornelius Merenda, gescheiterter Kandidat f√ºr das Konsulat in 217 BC.	[88, 76, 71]	78.3333	[0.6756935494242516, -0.31013469893126033, -0.9427811157199508]	-0.19240742174231984	-0.2449948936700821
[truncated: 5,824 more rows]

## Sheet: dev
index	original	translation	scores	mean	z_scores	z_mean	model_scores	fluent_inadequate
[truncated: 1,000 more rows]

## Sheet: test
index	original	translation	scores	mean	z_scores	z_mean	model_scores	fluent_inadequate	Column1	Column2
[truncated: 1,000 more rows]

## Sheet: Grenzfälle
However, after a few victories, the campaign falters.	Doch nach ein paar Siegen scheitert die Kampagne.	[100, 100, 95, 70, 90, 100]	92.5	[0.9278538515065428, 0.9907560639635818, 0.7460596756908127, -0.9797947139299322, 0.9229845854602209, 0.2661041225404445]	0.47899393087194503	-0.5641522407531738
[truncated: 58 more rows]
